# Supplementary material for: Transcriptome Analysis of Nodes and Buds from High and Low Tillering Switchgrass Inbred Lines
Source: PLoS One. 2013 Dec 30;8(12):e83772. doi: 10.1371/journal.pone.0083772 (PMC3875486; doi:10.1371/journal.pone.0083772)
Supplement: File S5 — List of probesets up regulated in nodes of low tillering line. (XLSX) [file pone.0083772.s005.xlsx]

## Sheet: Low nodes
File S5: List of probe sets up regulated in nodes of lowtillering line
Rice hit short	probeset_id	PviUT sequence ID	Ave LN	Ave HN	Ave LB	Ave HB	HN:LN	HB:LB
LOC_Os12g44330	KanlowCTG45906_at	KanlCTG45906	18.8632	9.25906	10.9811	8.64745	0.490853	0.787486
LOC_Os12g43930	AP13CTG23513_at	AP13CTG23513	1433.6	508.769	397.669	394.998	0.354889	0.993283
LOC_Os12g43490	AP13ITG68090_at	AP13ISTG68090	314.13	16.8709	167.767	190.183	0.0537067	1.13362
LOC_Os12g43450	KanlowCTG36837_at	KanlCTG36837	234.081	11.243	395.093	134.91	0.0480305	0.341463
LOC_Os12g43430	AP13ITG42000_at	AP13ISTG42000	1515.63	584.197	6888.62	7887.89	0.385449	1.14506
LOC_Os12g43380	AP13ITG62990_at	AP13ISTG62990	687.401	59.5879	739.576	596.401	0.0866858	0.806409
LOC_Os12g42884	KanlowCTG20599_s_at	KanlCTG20599	389.56	155.451	87.5967	84.5784	0.399041	0.965542
LOC_Os12g42660	KanlowCTG46145_s_at	KanlCTG46145	80.9812	23.8419	20.3949	12.9112	0.294412	0.633061
LOC_Os12g42090	KanlowCTG27107_s_at	KanlCTG27107	159.79	71.5682	348.967	139.955	0.447889	0.401054
LOC_Os12g41170	KanlowCTG20291_s_at	KanlCTG20291	41.9366	17.5086	601.011	617.744	0.417502	1.02784
LOC_Os12g40890	KanlowCTG01538RC_s_at	KanlCTG01538-RC	221.322	100.152	968.856	858.516	0.452518	0.886113
LOC_Os12g40070	AlamoCTG06364_at	AlamCTG06364	68.6743	11.3914	88.1145	33.5942	0.165876	0.381256
LOC_Os12g40070	AlamoCTG06364_s_at	AlamCTG06364	1184.7	201.99	1951.75	717.315	0.170498	0.367524
LOC_Os12g38970	AlamoCTG07058_s_at	AlamCTG07058	806.596	386.702	534.563	400.092	0.479425	0.748447
LOC_Os12g38460	KanlowCTG42309_s_at	KanlCTG42309	390.76	177.332	240.662	128.667	0.453814	0.534639
LOC_Os12g38140	AP13ITG69235_at	AP13ISTG69235	1759.02	641.46	8964.67	7384.64	0.36467	0.823749
LOC_Os12g37860	KanlowCTG15169_at	KanlCTG15169	84.0578	24.6165	60.1815	34.5361	0.292852	0.573867
LOC_Os12g37650	AP13ITG73685_s_at	AP13ISTG73685	621.802	222.39	3744.49	3798.59	0.357654	1.01445
LOC_Os12g37650	KanlowCTG16592_s_at	KanlCTG16592	190.06	59.5079	1102.42	1146.33	0.3131	1.03983
LOC_Os12g37590	AP13CTG07059_at	AP13CTG07059	586.694	281.127	439.85	286.026	0.479172	0.65028
LOC_Os12g37560	KanlowCTG13192_at	KanlCTG13192	785.858	31.8518	494.559	351.53	0.0405312	0.710794
LOC_Os12g36920	AP13CTG23487_s_at	AP13CTG23487	266.974	115.36	411.567	195.366	0.432103	0.474687
LOC_Os12g36830	OTHSWCTG12073_s_at	OthsCTG12073	1495.12	540.257	5296.66	5148.85	0.361346	0.972094
LOC_Os12g36830	AP13CTG23238_s_at	AP13CTG23238	547.01	138.141	4255.81	5386.3	0.252539	1.26563
LOC_Os12g36730	AP13CTG30144_at	AP13CTG30144	44.8645	18.1789	30.9999	21.6299	0.405195	0.697741
LOC_Os12g36310	AP13ITG45551_at	AP13ISTG45551	62.2675	23.2829	70.8084	23.1832	0.373917	0.327408
LOC_Os12g35630	AP13CTG01408_s_at	AP13CTG01408	362.047	170.745	720.182	420.788	0.47161	0.58428
LOC_Os12g34524	KanlowCTG21342RC_at	KanlCTG21342-RC	100.448	16.8469	35.5916	24.8722	0.167717	0.698824
LOC_Os12g34220	AlamoCTG04229_at	AlamCTG04229	125.862	54.402	89.8845	55.1949	0.432235	0.614065
LOC_Os12g34012	AP13CTG32229_at	AP13CTG32229	57.5084	24.8179	23.7721	20.5748	0.431553	0.8655
LOC_Os12g33958	AP13CTG35065_at	AP13CTG35065	54.471	19.3713	12.4516	9.77784	0.355626	0.785269
LOC_Os12g33956	AP13ITG53743_at	AP13ISTG53743	71.1217	34.416	45.7413	41.555	0.483904	0.908478
LOC_Os12g33230	AP13CTG23591_s_at	AP13CTG23591	187.443	82.7603	181.832	107.34	0.441521	0.590326
LOC_Os12g33160	AP13CTG16524_at	AP13CTG16524	80.3444	14.1721	40.7948	11.6779	0.176392	0.286259
LOC_Os12g33160	AP13CTG16524_s_at	AP13CTG16524	178.634	15.5085	74.3605	19.2278	0.0868168	0.258575
LOC_Os12g32760	AP13CTG73219_at	AP13CTG73219	54.8638	12.6031	33.2772	28.9904	0.229715	0.871178
LOC_Os12g32620	KanlowCTG02584_s_at	KanlCTG02584	88.4937	37.3633	1248.02	1552.13	0.422214	1.24368
LOC_Os12g29820	AP13ITG55891_s_at	AP13ISTG55891	574.04	133.071	83.5996	63.7882	0.231814	0.76302
LOC_Os12g29820	AP13CTG07539_at	AP13CTG07539	63.7428	22.1818	18.1979	20.5353	0.34799	1.12844
LOC_Os12g29520	AP13ITG44076_s_at	AP13ISTG44076	121.168	19.1822	120.84	71.5906	0.158311	0.592443
LOC_Os12g29520	AP13ITG44077_s_at	AP13ISTG44077	250.181	50.9449	214.99	138.622	0.203632	0.644782
LOC_Os12g28159	AlamoCTG13308_at	AlamCTG13308	48.6195	18.9871	57.294	18.0221	0.390525	0.314555
LOC_Os12g28100	AP13ITG51304_at	AP13ISTG51304	110.026	48.2116	67.4252	44.0269	0.438184	0.652973
LOC_Os12g25200	KanlowCTG07131_s_at	KanlCTG07131	191.345	68.7511	71.8068	313.364	0.359304	4.36399
LOC_Os12g23180	KanlowCTG12939_s_at	KanlCTG12939	48.1815	19.1762	93.0744	48.8696	0.398	0.52506
LOC_Os12g22620	AP13ITG38870_s_at	AP13ISTG38870	132.311	65.0197	156.002	98.4191	0.491418	0.630882
LOC_Os12g22080	AP13CTG08333_at	AP13CTG08333	539.324	252.5	241.354	154.347	0.468178	0.639504
LOC_Os12g20410	OTHSWSLT36458_at	OthsSGLT36458	101.199	33.5473	104.132	54.8877	0.331498	0.527096
LOC_Os12g19381	KanlowCTG11367_at	KanlCTG11367	1419.58	607.208	3480.27	3433.41	0.427738	0.986533
LOC_Os12g19381	KanlowCTG04206_x_at	KanlCTG04206	164.531	51.5919	908.993	407.403	0.313569	0.448191
LOC_Os12g18140	AP13ITG68031_x_at	AP13ISTG68031	124.691	53.2764	79.0711	48.5029	0.427266	0.613409
LOC_Os12g18140	OTHSWCTG10996_at	OthsCTG10996	151.2	65.3511	80.7868	40.9298	0.432217	0.506639
LOC_Os12g18130	AP13CTG06549_s_at	AP13CTG06549	562.227	253.21	244.26	204.617	0.450369	0.837701
LOC_Os12g16650	KanlowCTG18726_s_at	KanlCTG18726	217.795	35.1446	3688.5	3410.34	0.161365	0.924589
LOC_Os12g16650	AP13ITG55585_s_at	AP13ISTG55585	59.5069	18.2674	1978.8	1462.09	0.30698	0.738879
LOC_Os12g16520	AP13ITG77133_at	AP13ISTG77133	69.5577	32.3346	44.9433	44.7616	0.464861	0.995957
LOC_Os12g16410	OTHSWSLT33356_s_at	OthsSGLT33356	1965.33	806.247	432.618	369.966	0.410235	0.855179
LOC_Os12g15920	AP13ITG69994_at	AP13ISTG69994	41.8436	17.1128	144.508	147.065	0.40897	1.01769
LOC_Os12g15470	AP13CTG02161_at	AP13CTG02161	289.155	126.265	17.8765	21.4436	0.436668	1.19954
LOC_Os12g15420	AP13CTG00164_at	AP13CTG00164	138.304	61.2867	120.4	92.6802	0.443131	0.769766
LOC_Os12g14699	KanlowCTG44828_at	KanlCTG44828	56.3547	26.5801	35.5062	12.6521	0.471657	0.356335
LOC_Os12g14699	AP13ITG40328_s_at	AP13ISTG40328	217.521	97.0866	121.522	82.7821	0.446333	0.681209
LOC_Os12g13660	KanlowSLT48069_at	KanlSGLT48069	42.8229	18.7672	80.4798	51.0367	0.43825	0.634155
LOC_Os12g13640	AP13ITG73872_s_at	AP13ISTG73872	174.958	76.6603	900.766	1723.65	0.438164	1.91353
LOC_Os12g13640	KanlowCTG14782_s_at	KanlCTG14782	229.956	110.518	1038.92	1985.08	0.480604	1.91072
LOC_Os12g13470	AP13CTG30297_at	AP13CTG30297	259.63	90.564	224.546	151.693	0.34882	0.675554
LOC_Os12g13150	AP13CTG03759_at	AP13CTG03759	187.16	72.8784	171.321	108.554	0.389392	0.633633
LOC_Os12g12420	AP13ITG67188_at	AP13ISTG67188	106.955	51.0367	124.951	81.0259	0.477177	0.648463
LOC_Os12g10740	AP13ITG66311_at	AP13ISTG66311	55.7487	20.4758	32.63	26.7016	0.367288	0.818315
LOC_Os12g09700	KanlowCTG21109_s_at	KanlCTG21109	248.569	112.747	8042.69	8783.34	0.453585	1.09209
LOC_Os12g09700	AP13CTG16043_at	AP13CTG16043	100.109	40.5198	350.244	79.6976	0.404758	0.227549
LOC_Os12g09700	AP13ITG76677_at	AP13ISTG76677	35.6776	12.0524	590.179	294.074	0.337813	0.498279
LOC_Os12g09700	AP13CTG12001_at	AP13CTG12001	79.2041	34.4019	199.207	66.4863	0.434345	0.333755
LOC_Os12g09540	AP13CTG24348_at	AP13CTG24348	104.435	44.6704	183.669	119.93	0.427733	0.652969
LOC_Os12g09300	KanlowCTG17550_at	KanlCTG17550	926.462	306.273	132.993	105.544	0.330584	0.793606
LOC_Os12g09240	AP13CTG30096_at	AP13CTG30096	157.345	69.3441	52.7415	31.6707	0.440715	0.60049
LOC_Os12g08790	AP13CTG44617_s_at	AP13CTG44617	147.122	62.1544	201.581	182.348	0.422469	0.904591
LOC_Os12g08770	KanlowCTG05795_s_at	KanlCTG05795	1128.38	434.575	5008.42	3115.88	0.385133	0.622129
LOC_Os12g08770	KanlowCTG04189_s_at	KanlCTG04189	347.7	173.22	2105.78	1458.23	0.498189	0.692488
LOC_Os12g08730	KanlowCTG04517_s_at	KanlCTG04517	57.4132	26.7748	210.86	92.0967	0.466353	0.436768
LOC_Os12g08210	OTHSWCTG09953_at	OthsCTG09953	130.413	48.8133	80.3097	72.0885	0.374297	0.897631
LOC_Os12g08090	AP13ITG54071_s_at	AP13ISTG54071	3093.47	1291.84	102.183	96.7684	0.417604	0.947012
LOC_Os12g07820	AP13CTG33347_s_at	AP13CTG33347	505.818	148.098	263.602	113.906	0.292789	0.432113
LOC_Os12g07820	AP13ITG33342_s_at	AP13ISTG33342	132.565	58.8453	113.088	49.1798	0.443898	0.434879
LOC_Os12g07820	KanlowCTG32372_at	KanlCTG32372	84.5479	34.507	59.965	34.2256	0.408135	0.570759
LOC_Os12g07820	AP13ITG48428_s_at	AP13ISTG48428	286.362	107.9	267.579	124.983	0.376795	0.467089
LOC_Os12g07720	AP13CTG06526_at	AP13CTG06526	258.714	53.653	584.296	463.067	0.207383	0.792522
LOC_Os12g07580	AP13ITG63877_at	AP13ISTG63877	128.482	60.2676	147.651	152.515	0.469074	1.03294
LOC_Os12g07440	OTHSWSLT29474_s_at	OthsSGLT29474	285.051	34.783	27.7747	24.0527	0.122024	0.865991
LOC_Os12g06980	KanlowCTG18633_s_at	KanlCTG18633	136.2	64.8934	405.908	294.095	0.476458	0.724536
LOC_Os12g06980	AP13CTG04642_s_at	AP13CTG04642	174.274	81.595	539.713	401.717	0.468198	0.744316
LOC_Os12g06640	AP13CTG12245_at	AP13CTG12245	72.8462	32.1159	62.2499	35.4448	0.440873	0.569395
LOC_Os12g06200	AP13CTG07049_s_at	AP13CTG07049	359.676	172.512	109.137	100.97	0.479632	0.925166
LOC_Os12g06180	KanlowCTG25171_s_at	KanlCTG25171	76.2574	26.7936	170.481	241.47	0.351358	1.41641
LOC_Os12g06160	AP13CTG23806_at	AP13CTG23806	117.688	54.0949	349.74	234.891	0.459648	0.671617
LOC_Os12g06060	AP13CTG10685_at	AP13CTG10685	604.799	293.262	111.433	68.3285	0.484892	0.613179
LOC_Os12g05120	AP13CTG29320RC_s_at	AP13CTG29320-RC	203.701	74.8465	2469.73	2070.01	0.367433	0.838153
LOC_Os12g04290	AP13CTG15068_at	AP13CTG15068	64.3615	16.0035	24.6079	12.7182	0.24865	0.516831
LOC_Os12g04020	AP13CTG02430_at	AP13CTG02430	75.8573	8.78606	28.2472	31.8164	0.115824	1.12636
LOC_Os12g03970	KanlowCTG44383_s_at	KanlCTG44383	128.618	45.131	237.012	136.812	0.350892	0.577235
LOC_Os12g02870	AP13CTG14531_s_at	AP13CTG14531	51.7314	24.4719	91.0291	103.168	0.473056	1.13335
LOC_Os12g02870	KanlowCTG38684_s_at	KanlCTG38684	311.96	103.938	1435.94	1027.71	0.333177	0.715703
LOC_Os12g02870	AP13ITG62936RC_at	AP13ISTG62936-RC	68.0703	22.1809	264.972	296.621	0.325853	1.11944
LOC_Os12g02640	AP13CTG01898_s_at	AP13CTG01898	516.007	176.987	342.913	178.014	0.342994	0.519124
LOC_Os12g02540	KanlowCTG20734_s_at	KanlCTG20734	28.1692	14.0384	258.801	201.562	0.49836	0.778828
LOC_Os12g02385	AP13CTG10189_s_at	AP13CTG10189	123.614	10.3388	45.0978	11.6924	0.0836375	0.259268
LOC_Os12g02385	AP13ITG36334_s_at	AP13ISTG36334	121.331	8.94173	72.7555	8.12746	0.073697	0.111709
LOC_Os12g02340	KanlowCTG32616_at	KanlCTG32616	238.066	77.2014	466.736	249.215	0.324286	0.533953
LOC_Os12g02310	AP13CTG53160_at	AP13CTG53160	2420.76	586.271	11113.6	12131.4	0.242184	1.09159
LOC_Os12g02310	KanlowCTG08193_x_at	KanlCTG08193	692.681	57.5915	4897.34	4345.86	0.0831428	0.88739
LOC_Os12g02300	KanlowCTG02898_at	KanlCTG02898	295.302	59.9247	2889.22	2817.18	0.202927	0.975065
LOC_Os12g02300	KanlowCTG02898_s_at	KanlCTG02898	1091.2	200.16	10998.4	9741.98	0.183431	0.885762
LOC_Os12g02300	KanlowCTG45934_s_at	KanlCTG45934	430.58	144.338	5537.46	3138.16	0.335218	0.566714
LOC_Os12g02300	AP13CTG58480_x_at	AP13CTG58480	372.226	53.6702	5192.51	3848.29	0.144187	0.741122
LOC_Os12g02130	KanlowCTG08271_s_at	KanlCTG08271	510.256	250.732	329.7	241.389	0.491384	0.732148
LOC_Os12g01510	AP13CTG07649_s_at	AP13CTG07649	273.505	74.414	376.109	223.862	0.272075	0.595204
LOC_Os12g01380	KanlowCTG27783_at	KanlCTG27783	134.324	30.4165	104.996	17.0078	0.22644	0.161985
LOC_Os12g01190	AP13ITG39799_s_at	AP13ISTG39799	211.634	73.2839	149.755	83.7201	0.346277	0.559046
LOC_Os12g01190	AP13ITG67927_s_at	AP13ISTG67927	25.7493	9.1518	15.0366	11.9404	0.355419	0.794091
LOC_Os12g01140	KanlowCTG41462_s_at	KanlCTG41462	678.133	208.87	242.214	110.16	0.308008	0.454806
LOC_Os12g01030	AP13ITG39826_s_at	AP13ISTG39826	203.639	64.1246	46.5403	39.5868	0.314893	0.850593
LOC_Os11g47780	KanlowCTG37335_at	KanlCTG37335	135.259	60.7875	24.2583	18.7194	0.449416	0.77167
LOC_Os11g47780	AP13ITG49371_s_at	AP13ISTG49371	34.8552	11.8833	7.64748	6.75543	0.340934	0.883354
LOC_Os11g47460	OTHSWSLT23010_s_at	OthsSGLT23010	209.826	100.347	31.2752	20.2759	0.478238	0.648307
LOC_Os11g47460	OTHSWCTG22577_s_at	OthsCTG22577	255.459	113.434	8.32211	7.77121	0.444038	0.933803
LOC_Os11g47460	KanlowCTG22427_s_at	KanlCTG22427	1633	684.458	11.6756	13.5271	0.419141	1.15858
LOC_Os11g46960	AP13ITG52093_at	AP13ISTG52093	22.0425	7.87349	13.0867	12.6883	0.357195	0.969552
LOC_Os11g46210	AP13CTG01764_s_at	AP13CTG01764	370.949	170.272	754.898	537.468	0.459017	0.711974
LOC_Os11g45990	AP13ITG65978_at	AP13ISTG65978	455.098	85.9499	237.012	178.544	0.18886	0.753313
LOC_Os11g44810	AP13ITG41592_at	AP13ISTG41592	135.311	56.1187	179.773	144.007	0.414737	0.801051
LOC_Os11g43640	AP13CTG37349_s_at	AP13CTG37349	815.588	191.506	560.278	256.098	0.234807	0.457091
LOC_Os11g43640	AP13CTG37351_x_at	AP13CTG37351	435.062	121.448	382.764	170.671	0.27915	0.445892
LOC_Os11g43620	AP13ITG75804_at	AP13ISTG75804	127.632	57.0031	107.761	48.5321	0.44662	0.450366
LOC_Os11g42970	AP13ITG71944_at	AP13ISTG71944	657.256	163.711	30.8032	24.4912	0.249083	0.795085
LOC_Os11g42350	AlamoCTG11249_s_at	AlamCTG11249	289.017	122.798	349.841	182.912	0.424881	0.522845
LOC_Os11g42160	AP13CTG01712_at	AP13CTG01712	521.478	258.004	360.933	233.245	0.494754	0.646227
LOC_Os11g41850	AP13ITG65010_at	AP13ISTG65010	50.6424	20.6059	50.9947	32.6755	0.40689	0.640764
LOC_Os11g41150	AP13CTG24201_s_at	AP13CTG24201	47.6723	22.4419	270.655	289.517	0.470755	1.06969
LOC_Os11g41150	AP13ITG60212_at	AP13ISTG60212	65.472	24.9626	173.662	148.721	0.381272	0.856381
LOC_Os11g41150	KanlowCTG09236_s_at	KanlCTG09236	78.0707	28.8463	424.979	476.063	0.369489	1.1202
LOC_Os11g41130	AP13CTG20019_at	AP13CTG20019	76.4704	12.21	136.733	45.294	0.15967	0.331259
LOC_Os11g41130	AP13ITG42058_s_at	AP13ISTG42058	91.5485	32.2518	117.863	71.1507	0.352292	0.603675
LOC_Os11g41100	OTHSWCTG07454_s_at	OthsCTG07454	143.655	15.4921	90.8375	72.066	0.107843	0.793351
LOC_Os11g40610	AP13ITG45231_s_at	AP13ISTG45231	141.575	60.6001	315.241	104.132	0.428042	0.330326
LOC_Os11g39450	AP13CTG11881_at	AP13CTG11881	206.624	42.1733	58.8977	28.4918	0.204106	0.483751
LOC_Os11g38920	KanlowCTG43994_s_at	KanlCTG43994	178.634	83.2855	417.34	373.781	0.466234	0.895627
LOC_Os11g38010	AP13ITG41829_at	AP13ISTG41829	466.288	225.224	477.334	318.469	0.483015	0.667183
LOC_Os11g37980	KanlowCTG37739_s_at	KanlCTG37739	93.4927	46.073	116.362	61.915	0.492798	0.53209
LOC_Os11g37970	KanlowCTG21678_s_at	KanlCTG21678	623.315	102.908	2136.91	2782.6	0.165098	1.30216
LOC_Os11g37970	KanlowCTG06492_s_at	KanlCTG06492	370.949	134.522	2584.06	2504.03	0.362642	0.969028
LOC_Os11g37940	AP13ITG73684_at	AP13ISTG73684	144.021	68.0319	615.241	228.565	0.472373	0.371505
LOC_Os11g37940	KanlowCTG27681_s_at	KanlCTG27681	346.091	78.8008	1852.71	1269.58	0.227688	0.685256
LOC_Os11g37670	AP13CTG23533_s_at	AP13CTG23533	241.389	37.8063	1067.17	1090.15	0.15662	1.02153
LOC_Os11g37120	AP13CTG22532_at	AP13CTG22532	95.3782	40.0855	29.7221	20.7758	0.420279	0.699001
LOC_Os11g35550	AP13ITG35539_s_at	AP13ISTG35539	167.151	34.1122	100.781	30.6713	0.20408	0.304337
LOC_Os11g35050	AP13ITG69124_s_at	AP13ISTG69124	286.362	140.658	486.066	408.751	0.491189	0.840937
LOC_Os11g34750	AP13CTG30920_at	AP13CTG30920	191.456	53.4469	99.0537	60.3473	0.279161	0.609238
LOC_Os11g34350	AP13CTG04167_at	AP13CTG04167	814.805	285.12	778.746	729.394	0.349924	0.936627
LOC_Os11g33240	AP13CTG26790_s_at	AP13CTG26790	468.957	229.956	220.589	222.861	0.490358	1.0103
LOC_Os11g33240	AP13CTG23003_at	AP13CTG23003	101.147	47.8639	42.2119	45.7501	0.473211	1.08382
LOC_Os11g33090	KanlowCTG44721_s_at	KanlCTG44721	279.185	71.8792	332.089	190.735	0.257461	0.574349
LOC_Os11g32810	AP13CTG09413_s_at	AP13CTG09413	78.2659	26.8157	53.3327	37.7076	0.342624	0.707025
LOC_Os11g32650	AP13CTG22312_at	AP13CTG22312	74.8777	33.9021	269.251	224.416	0.452766	0.833486
LOC_Os11g32260	KanlowCTG43499_at	KanlCTG43499	315.446	82.2656	561.625	222.909	0.260792	0.3969
LOC_Os11g31770	AP13CTG13650_at	AP13CTG13650	184.841	90.564	114.588	86.2975	0.489957	0.753112
LOC_Os11g31640	AlamoCTG08827_at	AlamCTG08827	53.4469	15.7055	41.7898	10.3547	0.293852	0.247781
LOC_Os11g31590	AP13ITG69363_s_at	AP13ISTG69363	82.808	24.3456	142.622	79.1054	0.294	0.554652
LOC_Os11g30360	AP13ITG74033_at	AP13ISTG74033	263.425	43.2822	1187.3	1310.32	0.164306	1.10362
LOC_Os11g30140	OTHSWCTG19039_at	OthsCTG19039	100.109	17.09	42.6376	19.2355	0.170714	0.45114
LOC_Os11g29650	AP13ITG43488_at	AP13ISTG43488	512.049	176.086	734.256	596.573	0.343885	0.812487
LOC_Os11g29290	AP13CTG27701_at	AP13CTG27701	254.531	99.2369	147.616	93.8624	0.389882	0.635857
LOC_Os11g28950	AP13CTG31183_at	AP13CTG31183	615.862	100.085	25.5715	24.7414	0.162512	0.967538
LOC_Os11g27540	AP13ITG67617_s_at	AP13ISTG67617	92.4314	32.4475	1414.88	1375	0.351044	0.971814
LOC_Os11g25980	KanlowCTG24240_at	KanlCTG24240	85.4793	40.9573	40.6182	44.7863	0.479149	1.10262
LOC_Os11g25860	AP13ITG67442_s_at	AP13ISTG67442	644.126	242.214	99.4889	68.1344	0.376035	0.684844
LOC_Os11g24610	AlamoCTG07855_at	AlamCTG07855	41.707	19.3935	48.4404	34.4177	0.464995	0.710516
LOC_Os11g24610	KanlowCTG03851_s_at	KanlCTG03851	229.264	106.902	358.399	173.096	0.466281	0.482968
LOC_Os11g24060	AP13ITG76875_s_at	AP13ISTG76875	1181.21	530.068	255.238	245.053	0.448751	0.960094
LOC_Os11g23050	AlamoCTG12504_at	AlamCTG12504	228.205	103.606	105.99	52.2308	0.454003	0.49279
LOC_Os11g19730	AP13ITG47688_s_at	AP13ISTG47688	109.962	39.0418	88.6811	52.0291	0.355047	0.586699
LOC_Os11g19460	AP13ITG36447_at	AP13ISTG36447	471.861	231.534	135.867	93.5798	0.490682	0.688762
LOC_Os11g18940	AP13CTG16274_at	AP13CTG16274	132.603	64.707	516.928	775.039	0.487975	1.49932
LOC_Os11g18940	KanlowCTG32866RC_s_at	KanlCTG32866-RC	117.377	46.6882	180.201	170.137	0.397762	0.944152
LOC_Os11g18730	AP13ITG73650RC_s_at	AP13ISTG73650-RC	68.699	20.4639	401.705	190.037	0.297878	0.473077
LOC_Os11g18194	KanlowCTG04767_s_at	KanlCTG04767	946.503	225.354	283.681	291.111	0.238091	1.02619
LOC_Os11g17290	AP13CTG11694_s_at	AP13CTG11694	216.766	81.0104	177.442	97.0898	0.373723	0.547165
LOC_Os11g17290	KanlowCTG44104_s_at	KanlCTG44104	139.132	60.4996	135.298	67.8117	0.434836	0.501202
LOC_Os11g14520	KanlowCTG45390_s_at	KanlCTG45390	247.494	27.4741	114.896	49.0172	0.111009	0.426621
LOC_Os11g14160	AP13ITG42248_at	AP13ISTG42248	24.8722	9.82504	11.0479	6.74334	0.395021	0.610372
LOC_Os11g14140	KanlowCTG23145_at	KanlCTG23145	123.025	61.0875	69.4941	45.1203	0.496546	0.649268
LOC_Os11g13890	OTHSWSLT30886_s_at	OthsSGLT30886	345.024	167.734	5541.45	3347.38	0.486152	0.604062
LOC_Os11g13890	KanlowCTG00728_at	KanlCTG00728	124.088	48.8509	1205.74	900.896	0.39368	0.747173
LOC_Os11g13850	AP13CTG32184_s_at	AP13CTG32184	33.6038	14.8708	31.0339	25.0212	0.442534	0.806254
LOC_Os11g12740	KanlowCTG23086_s_at	KanlCTG23086	2284.25	710.011	131.144	94.887	0.310829	0.723533
LOC_Os11g11990	KanlowCTG12405_s_at	KanlCTG12405	442.909	139.827	1315.36	1196.84	0.315702	0.909888
LOC_Os11g11990	KanlowCTG42546_s_at	KanlCTG42546	580.162	43.8909	323.147	35.3166	0.0756528	0.109289
LOC_Os11g11650	AP13CTG07520_at	AP13CTG07520	43.4403	11.8608	7.78143	6.63262	0.273036	0.852365
LOC_Os11g11370	KanlowSLT48699_at	KanlSGLT48699	86.0738	38.0775	103.609	66.7367	0.442382	0.644119
LOC_Os11g10680	AlamoCTG09809_s_at	AlamCTG09809	10593.3	5263.1	347.825	230.089	0.496832	0.661508
LOC_Os11g10550	AP13CTG11212_at	AP13CTG11212	358.313	113.531	154.377	73.2733	0.31685	0.47464
LOC_Os11g10384	KanlowCTG44911RC_s_at	KanlCTG44911-RC	39.6971	11.0786	37.9711	29.5498	0.279077	0.778219
LOC_Os11g10384	KanlowCTG44911RC_at	KanlCTG44911-RC	15.6279	7.39066	13.4003	21.7399	0.472916	1.62235
LOC_Os11g10100	KanlowCTG39332_at	KanlCTG39332	456.854	164.897	129.498	109.706	0.360941	0.847168
LOC_Os11g09020	AP13ITG69656_at	AP13ISTG69656	80.4417	36.8299	24.2676	25.7384	0.457846	1.06061
LOC_Os11g08950	KanlowCTG08338_s_at	KanlCTG08338	179.234	88.4937	232.347	250.738	0.493732	1.07915
LOC_Os11g08870	AP13CTG17916_at	AP13CTG17916	114.957	15.7858	88.882	21.5897	0.137319	0.242904
LOC_Os11g08660	AlamoCTG14084_at	AlamCTG14084	31.7723	7.17121	28.0682	7.59047	0.225706	0.270429
LOC_Os11g08080	KanlowCTG47544_at	KanlCTG47544	214.536	97.5307	170.076	124.969	0.454611	0.734783
LOC_Os11g07020	KanlowCTG45734_s_at	KanlCTG45734	1128.59	453.516	4560.6	3136.65	0.401841	0.687771
LOC_Os11g06610	AP13ITG69158_at	AP13ISTG69158	169.566	74.5212	128.968	100.805	0.439482	0.78163
LOC_Os11g06390	AP13ITG42133_at	AP13ISTG42133	66.6024	24.5298	54.1969	50.4122	0.368302	0.930168
LOC_Os11g06040	AP13CTG06469_at	AP13CTG06469	181.78	81.5895	94.3736	65.118	0.448837	0.690002
LOC_Os11g05556	OTHSWCTG01705_at	OthsCTG01705	91.4825	14.8253	123.835	127.595	0.162056	1.03036
LOC_Os11g05480	AP13CTG28848_s_at	AP13CTG28848	187.16	41.8781	27.3788	13.4655	0.223756	0.491824
LOC_Os11g05470	AP13CTG04287_s_at	AP13CTG04287	2661.93	1156.62	335.684	284.077	0.434505	0.846263
LOC_Os11g05390	AP13CTG13652_s_at	AP13CTG13652	235.591	63.9813	9.787	10.3031	0.271578	1.05274
LOC_Os11g05120	AP13CTG29081_at	AP13CTG29081	92.0923	27.7088	137.664	127.687	0.300881	0.927523
LOC_Os11g05050	KanlowCTG22506_at	KanlCTG22506	17.3302	8.52806	19.4944	8.67479	0.492092	0.44499
LOC_Os11g05050	KanlowCTG07216_s_at	KanlCTG07216	3472.35	227.037	2968.31	90.8682	0.0653841	0.0306128
LOC_Os11g04980	AP13CTG01318_at	AP13CTG01318	67.9701	25.9682	668.636	558.343	0.382053	0.835048
LOC_Os11g04980	AlamoCTG13944_s_at	AlamCTG13944	102.658	24.4201	303.692	164.065	0.237879	0.540236
LOC_Os11g04954	AP13ITG60981_at	AP13ISTG60981	146.021	60.6001	85.1094	58.1199	0.415008	0.682885
LOC_Os11g04900	AP13ITG73630_at	AP13ISTG73630	368.546	116.429	674.42	411.567	0.315915	0.610254
LOC_Os11g04740	KanlowCTG19140_s_at	KanlCTG19140	535.599	209.322	519.459	275.527	0.390818	0.530411
LOC_Os11g04300	AP13CTG19856_s_at	AP13CTG19856	154.347	35.6468	64.6682	66.4906	0.230952	1.02818
LOC_Os11g03820	KanlowCTG39623_at	KanlCTG39623	83.9941	33.6305	125.414	127.128	0.400391	1.01367
LOC_Os11g03540	AP13CTG03306_at	AP13CTG03306	125.82	53.1389	22.0346	20.2462	0.422341	0.918837
LOC_Os11g03200	KanlowCTG47499_s_at	KanlCTG47499	1552.69	348.85	1951	1148.41	0.224675	0.588627
LOC_Os11g03160	AP13CTG04528_at	AP13CTG04528	146.049	60.9685	673.74	499.731	0.417452	0.741727
LOC_Os11g02369	KanlowCTG35464_at	KanlCTG35464	283.354	69.8868	1333.73	1201.01	0.246641	0.900493
LOC_Os11g02305	KanlowCTG12375_at	KanlCTG12375	256.154	82.072	18.8416	19.073	0.320401	1.01228
LOC_Os11g01880	AP13CTG04551_at	AP13CTG04551	396.329	10.1987	255.79	10.0951	0.0257329	0.0394664
LOC_Os11g01780	AlamoCTG03304_at	AlamCTG03304	281.492	133.551	84.481	63.7264	0.47444	0.754328
LOC_Os10g43060	OTHSWCTG05281_s_at	OthsCTG05281	870.501	396.215	657.509	540.257	0.455157	0.821673
LOC_Os10g42100	AP13ITG49471_s_at	AP13ISTG49471	1028.94	492.526	559.418	556.566	0.478671	0.994901
LOC_Os10g41650	KanlowCTG39169RC_at	KanlCTG39169-RC	140.8	62.2675	96.2107	66.9889	0.442241	0.696272
LOC_Os10g41590	AP13ITG68062_at	AP13ISTG68062	394.865	172.649	358.313	169.533	0.437235	0.473142
LOC_Os10g41520	KanlowCTG47592_at	KanlCTG47592	81.2031	39.7922	47.5607	31.2482	0.490033	0.657018
LOC_Os10g40900	AP13ITG55598_at	AP13ISTG55598	143.614	67.9334	109.548	99.0722	0.473029	0.904369
LOC_Os10g40810	AP13CTG55540_s_at	AP13CTG55540	181.024	53.033	1260.72	1086.15	0.292961	0.861531
LOC_Os10g40730	AP13ITG73595_s_at	AP13ISTG73595	508.476	176.137	3083.41	2063.48	0.346402	0.669221
LOC_Os10g40730	KanlowCTG08024_s_at	KanlCTG08024	250.948	123.747	3003.06	2740.34	0.493116	0.912516
LOC_Os10g40720	KanlowCTG17198_at	KanlCTG17198	278.231	114.896	1551.64	1453.4	0.412953	0.936686
LOC_Os10g40720	AP13CTG27439_s_at	AP13CTG27439	3655.99	1679.09	8995.63	9442.86	0.45927	1.04972
LOC_Os10g40700	AP13ITG74644_x_at	AP13ISTG74644	234.867	92.5702	1515.99	1202.02	0.394138	0.792894
LOC_Os10g40614	KanlowCTG17276_s_at	KanlCTG17276	279.172	105.291	4186.99	4545.23	0.377156	1.08556
LOC_Os10g40614	KanlowCTG33265_at	KanlCTG33265	90.2231	32.3362	1557.72	1618.35	0.358403	1.03893
LOC_Os10g40100	KanlowSLT56381_at	KanlSGLT56381	109.655	16.2144	96.7405	76.7702	0.147867	0.793569
LOC_Os10g39980	AP13CTG28675_s_at	AP13CTG28675	146.631	48.1968	17.7907	18.9645	0.328694	1.06598
LOC_Os10g39980	AP13ITG44848_s_at	AP13ISTG44848	264.125	125.203	16.154	14.2173	0.474029	0.880112
LOC_Os10g39840	AP13ITG38712_s_at	AP13ISTG38712	102.547	36.7725	560.494	571.062	0.358592	1.01885
LOC_Os10g39780	AP13CTG09720_s_at	AP13CTG09720	233.755	35.1439	121.552	119.861	0.150345	0.986091
LOC_Os10g39680	AP13ITG67741_at	AP13ISTG67741	165.521	77.7383	321.116	239.86	0.46966	0.746958
LOC_Os10g39410	KanlowCTG06868_at	KanlCTG06868	101.602	40.2399	1756.06	1423.35	0.396055	0.810538
LOC_Os10g39410	KanlowCTG06565_at	KanlCTG06565	40.8016	14.5778	1897.1	1734.18	0.357285	0.91412
LOC_Os10g39140	AP13CTG35407_s_at	AP13CTG35407	100.253	31.8278	116.6	44.3917	0.317475	0.380717
LOC_Os10g38630	AP13ITG43231_s_at	AP13ISTG43231	404.744	173.129	1680.97	1269.49	0.427749	0.755214
LOC_Os10g38196	AP13ITG47641_s_at	AP13ISTG47641	287.227	81.6973	100.094	76.6603	0.284435	0.765881
LOC_Os10g37570	AP13ITG43294RC_at	AP13ISTG43294-RC	120.331	53.0816	365.825	249.095	0.441129	0.680915
LOC_Os10g37190	AP13ITG63211_at	AP13ISTG63211	188.747	63.6006	216.828	136.239	0.336962	0.628329
LOC_Os10g36500	AP13CTG24119_s_at	AP13CTG24119	225.354	55.3708	359.547	346.091	0.245706	0.962577
LOC_Os10g36420	AP13ITG69042_at	AP13ISTG69042	38.3541	14.2424	149.755	143.531	0.371341	0.958435
LOC_Os10g35644	AP13ITG67908_at	AP13ISTG67908	134.444	62.9783	28.2465	34.6721	0.468433	1.22748
LOC_Os10g35294	AP13ITG56035_at	AP13ISTG56035	186.81	84.2059	257.836	217.531	0.450758	0.843679
LOC_Os10g35130	AP13ITG55377_at	AP13ISTG55377	44.7935	20.1851	21.1484	19.099	0.450625	0.903095
LOC_Os10g35070	AP13ITG32848_s_at	AP13ISTG32848	263.8	113.029	15.0414	9.22139	0.428466	0.613068
LOC_Os10g34470	AP13CTG27069_at	AP13CTG27069	126.695	61.2054	186.471	214.296	0.483092	1.14922
LOC_Os10g33830	AP13CTG07941_at	AP13CTG07941	110.358	44.983	138.261	110.628	0.407609	0.800144
LOC_Os10g33370	AP13ITG70932_s_at	AP13ISTG70932	60.5491	28.9425	699.564	602.869	0.478001	0.861779
LOC_Os10g33250	KanlowCTG08860_s_at	KanlCTG08860	559.095	77.3961	337.826	93.7037	0.138431	0.277372
LOC_Os10g33170	AP13ITG40807_at	AP13ISTG40807	43.1125	9.75933	427.01	325.161	0.226369	0.761483
LOC_Os10g32920	AP13CTG26232_at	AP13CTG26232	44.5964	21.7312	20.6062	21.5618	0.487287	1.04637
LOC_Os10g32880	OTHSWCTG08044_at	OthsCTG08044	175.564	17.4479	147.206	53.1798	0.0993825	0.36126
LOC_Os10g32730	AP13CTG10299_s_at	AP13CTG10299	92.4376	37.4119	64.9932	35.9914	0.404726	0.553771
LOC_Os10g32060	AP13ITG66409_at	AP13ISTG66409	170.712	38.9954	522.808	411.693	0.228427	0.787464
LOC_Os10g31864	KanlowCTG44029_s_at	KanlCTG44029	123.747	12.8066	115.429	39.9811	0.103491	0.346369
LOC_Os10g31120	AP13ITG60284_s_at	AP13ISTG60284	636.968	149.612	272.007	127.226	0.234881	0.467729
LOC_Os10g31120	AlamoSLT16319_at	AlamSGLT16319	64.5706	26.4593	28.4867	20.1359	0.409773	0.706852
LOC_Os10g30090	KanlowCTG38918RC_at	KanlCTG38918-RC	68.4486	23.1034	97.8707	59.525	0.33753	0.608201
LOC_Os10g29650	AP13CTG02965RC_s_at	AP13CTG02965-RC	280.2	126.437	158.778	124.07	0.451239	0.781405
LOC_Os10g28710	KanlowCTG01705_at	KanlCTG01705	185.107	86.4872	112.612	87.435	0.467228	0.776427
LOC_Os10g28360	AP13CTG03722_at	AP13CTG03722	526.394	160.558	414.457	414.855	0.305014	1.00096
LOC_Os10g28200	AP13CTG10399_s_at	AP13CTG10399	53.6856	26.3333	71.3827	82.1708	0.49051	1.15113
LOC_Os10g28120	AP13CTG58805_at	AP13CTG58805	1676.51	212.311	132.981	230.233	0.126638	1.73132
LOC_Os10g28080	KanlowCTG46582_s_at	KanlCTG46582	33.2081	6.59808	32.1113	38.0555	0.198689	1.18511
LOC_Os10g28060	KanlowCTG12692_s_at	KanlCTG12692	274.381	39.808	2188.46	1938.27	0.145083	0.885677
LOC_Os10g28020	AP13CTG05137_s_at	AP13CTG05137	87.7939	35.506	39.4588	22.5655	0.404425	0.571876
LOC_Os10g27370	AP13CTG07043_at	AP13CTG07043	48.6716	13.7423	46.835	29.5569	0.282348	0.631086
LOC_Os10g27370	AP13CTG05766_at	AP13CTG05766	243.881	48.8015	170.566	93.0565	0.200104	0.545573
LOC_Os10g25780	KanlowCTG00342_s_at	KanlCTG00342	744.452	296.141	1951.42	1871.57	0.397797	0.95908
LOC_Os10g25600	AlamoCTG11839_at	AlamCTG11839	71.8433	35.1392	27.7776	15.6741	0.489109	0.564272
LOC_Os10g25450	AP13CTG11638_at	AP13CTG11638	130.257	53.0343	520.953	252.864	0.407151	0.485387
LOC_Os10g22484	AP13CTG07588_at	AP13CTG07588	85.6459	40.0855	50.3953	41.4205	0.468038	0.821913
LOC_Os10g19880	AP13CTG08420_at	AP13CTG08420	186.269	77.4959	204.425	104.661	0.416042	0.511978
LOC_Os10g19270	KanlowCTG17398_at	KanlCTG17398	63.5594	23.6606	514.027	437.598	0.372259	0.851313
LOC_Os10g18220	KanlowCTG21016_at	KanlCTG21016	397.554	119.901	104.063	51.0624	0.301597	0.49069
LOC_Os10g17990	AP13ITG77631_at	AP13ISTG77631	39.2794	16.4818	151.802	147.26	0.419605	0.970075
LOC_Os10g17260	AP13ITG74940_at	AP13ISTG74940	49.072	23.8382	571.308	525.711	0.485779	0.920188
LOC_Os10g14920	OTHSWSLT39565_s_at	OthsSGLT39565	27.2371	11.2161	11.2323	11.2779	0.411796	1.00406
LOC_Os10g14920	AP13CTG18478_at	AP13CTG18478	751.909	159.802	41.5111	38.8224	0.212528	0.93523
LOC_Os10g12620	KanlowCTG40808_s_at	KanlCTG40808	353.38	163.711	111.968	53.2764	0.463272	0.475816
LOC_Os10g11200	KanlowCTG39656_s_at	KanlCTG39656	46.8249	10.7901	26.0825	17.1064	0.230435	0.655858
LOC_Os10g10990	OTHSWCTG02188_at	OthsCTG02188	442.686	183.158	517.354	1045.74	0.413744	2.02133
LOC_Os10g08970	AlamoCTG05721_at	AlamCTG05721	79.6746	18.1547	70.4642	13.1501	0.227861	0.186621
LOC_Os10g08026	AP13ITG69190_at	AP13ISTG69190	28.6489	8.20685	137.403	172.483	0.286463	1.2553
LOC_Os10g06810	AP13CTG17993_at	AP13CTG17993	108.407	44.1763	103.609	114.184	0.407505	1.10206
LOC_Os10g06130	AP13CTG05301_at	AP13CTG05301	527.014	228.616	598.705	329.858	0.433795	0.550953
LOC_Os10g05750	AP13CTG15608_at	AP13CTG15608	43.3212	13.1098	2838.41	2538.92	0.302617	0.894488
LOC_Os10g05750	AP13CTG15608_s_at	AP13CTG15608	58.4849	23.7022	2847.39	2377.48	0.40527	0.834968
LOC_Os10g05750	KanlowCTG13907_s_at	KanlCTG13907	56.5147	25.9946	2470.98	2179.83	0.459961	0.882173
LOC_Os10g05600	AP13ITG71525_s_at	AP13ISTG71525	56.1513	17.7722	952.583	694.648	0.316506	0.729226
LOC_Os10g05520	KanlowSLT54404_at	KanlSGLT54404	88.1108	36.0017	26.7936	15.7012	0.408596	0.586006
LOC_Os10g04770	AP13CTG04309_at	AP13CTG04309	1049.45	441.114	770.705	404.511	0.420327	0.524858
LOC_Os10g04730	KanlowCTG40626_s_at	KanlCTG40626	290.583	77.5379	56.1149	65.0821	0.266836	1.1598
LOC_Os10g04730	AP13ITG50188_s_at	AP13ISTG50188	80.016	36.2302	33.9585	36.4151	0.452786	1.07234
LOC_Os10g04730	AP13CTG23027_at	AP13CTG23027	243.278	73.7724	64.1725	75.1423	0.303243	1.17094
LOC_Os10g04674	AP13CTG10241_s_at	AP13CTG10241	348.666	167.159	62.7371	32.7474	0.479425	0.521979
LOC_Os10g04674	AP13CTG10241_at	AP13CTG10241	420.242	162.627	100.448	51.5458	0.386984	0.513157
LOC_Os10g04640	AP13CTG29144_at	AP13CTG29144	294.095	107.844	140.658	88.0876	0.366699	0.626253
LOC_Os10g04470	AP13CTG18414_at	AP13CTG18414	118.918	55.1419	20.7132	15.8769	0.463699	0.766511
LOC_Os10g04270	OTHSWCTG08469_s_at	OthsCTG08469	138.473	45.2925	40.4516	29.7554	0.327085	0.735579
LOC_Os10g02360	AP13CTG02396_s_at	AP13CTG02396	103.26	45.3507	163.159	127.804	0.439189	0.783305
LOC_Os10g01480	AP13CTG10544_s_at	AP13CTG10544	659.875	317.739	114.222	120.84	0.481514	1.05793
LOC_Os10g01110	AP13CTG27808_at	AP13CTG27808	26.2531	12.5866	98.5152	103.241	0.479434	1.04797
LOC_Os09g39260	AP13CTG12428_s_at	AP13CTG12428	70.7956	26.2142	62.8652	21.8188	0.37028	0.347073
LOC_Os09g39210	AP13ITG77790_at	AP13ISTG77790	108.087	12.5106	298.523	10.642	0.115746	0.0356489
LOC_Os09g38910	AP13CTG31285_at	AP13CTG31285	84.9662	37.9076	55.4155	34.9015	0.446149	0.629815
LOC_Os09g38900	AlamoCTG12361_at	AlamCTG12361	213.306	76.1989	111.818	50.2182	0.357228	0.449107
LOC_Os09g38840	AP13CTG10159_at	AP13CTG10159	444.503	212.489	188.82	155.421	0.478039	0.823116
LOC_Os09g38772	AlamoCTG12993_at	AlamCTG12993	160.619	65.0309	190.914	50.1265	0.404875	0.26256
LOC_Os09g38630	AP13ITG69853_at	AP13ISTG69853	401.861	130.69	377.104	313.003	0.32521	0.830019
LOC_Os09g38530	KanlowCTG45630RC_x_at	KanlCTG45630-RC	274.018	121.107	921.284	724.095	0.441968	0.785962
LOC_Os09g38130	KanlowCTG26181_at	KanlCTG26181	220.939	52.5808	96.0077	48.8978	0.237988	0.509311
LOC_Os09g37920	AP13CTG19568_s_at	AP13CTG19568	46.6697	20.7616	177.298	150.181	0.444863	0.84705
LOC_Os09g37590	AlamoCTG14498_s_at	AlamCTG14498	205.079	56.6922	372.297	174.891	0.276441	0.469761
LOC_Os09g37520	KanlowCTG40358_s_at	KanlCTG40358	122.812	24.8507	2105.63	1318.86	0.202347	0.626351
LOC_Os09g37330	AP13CTG09274_at	AP13CTG09274	105.389	36.6332	48.9174	73.0527	0.3476	1.49339
LOC_Os09g37330	AP13CTG12104_at	AP13CTG12104	61.9261	15.4205	29.3584	26.0862	0.249015	0.888544
LOC_Os09g37270	KanlowCTG14400_s_at	KanlCTG14400	202.562	63.2273	483.056	472.797	0.312138	0.978762
LOC_Os09g37230	AP13CTG01319_at	AP13CTG01319	446.407	220.131	231.556	217.552	0.493116	0.939523
LOC_Os09g37230	AP13CTG01319_s_at	AP13CTG01319	932.666	381.378	456.736	344.9	0.408912	0.755141
LOC_Os09g37230	OTHSWCTG03270_at	OthsCTG03270	858.104	406.61	422.327	360.788	0.473847	0.854286
LOC_Os09g37200	AP13ITG56970_at	AP13ISTG56970	235.568	84.0578	181.058	100.08	0.35683	0.552749
LOC_Os09g37100	KanlowCTG21769_s_at	KanlCTG21769	817.698	403.802	661.748	370.985	0.493827	0.560613
LOC_Os09g36930	AP13ITG54227_at	AP13ISTG54227	155.6	77.0532	415.963	574.068	0.495201	1.38009
LOC_Os09g36860	AP13ITG65361_s_at	AP13ISTG65361	1052.81	472.775	396.215	325.489	0.449058	0.821496
LOC_Os09g36130	KanlowCTG40854_s_at	KanlCTG40854	501.475	94.0319	1053.02	396.441	0.187511	0.376481
LOC_Os09g36080	AP13ITG43083_at	AP13ISTG43083	1178.08	486.3	205.074	116.723	0.412791	0.569177
LOC_Os09g35810	AP13CTG22653_at	AP13CTG22653	123.573	18.804	6.75853	6.74611	0.152169	0.998162
LOC_Os09g35760	KanlowCTG07355_at	KanlCTG07355	51.6697	21.8105	238.1	121.941	0.422113	0.51214
LOC_Os09g34900	AP13CTG02655_at	AP13CTG02655	635.966	102.224	445.733	252.482	0.160738	0.566442
LOC_Os09g34180	AP13ITG58462_s_at	AP13ISTG58462	144.703	62.3017	768.061	709.329	0.43055	0.923532
LOC_Os09g34090	KanlowCTG39415_at	KanlCTG39415	132.285	56.6895	58.8934	39.8488	0.428541	0.676625
LOC_Os09g33920	AP13CTG15070_at	AP13CTG15070	294.074	124.951	575.862	508.659	0.424896	0.8833
LOC_Os09g33580	KanlowCTG23284_at	KanlCTG23284	233.245	49.9808	1601.28	1595.88	0.214285	0.99663
LOC_Os09g33490	AP13ITG60228_at	AP13ISTG60228	249.724	119.454	109.896	105.012	0.478345	0.955558
LOC_Os09g33460	AP13ITG57364_at	AP13ISTG57364	75.5582	30.3216	453.537	395.662	0.401302	0.872391
LOC_Os09g33450	AP13ITG65837_at	AP13ISTG65837	597.046	231.756	671.324	403.123	0.388172	0.60049
LOC_Os09g32940	AP13CTG54178_s_at	AP13CTG54178	260.329	98.3813	156.532	72.5899	0.377912	0.463739
LOC_Os09g32710	AP13CTG03961_at	AP13CTG03961	168.435	79.0711	173.983	99.7426	0.469446	0.573288
LOC_Os09g32540	KanlowCTG20801_at	KanlCTG20801	47.2174	23.3252	146.526	87.1497	0.493996	0.594775
LOC_Os09g32540	AP13CTG23219_s_at	AP13CTG23219	43.1488	19.9828	279.775	313.116	0.463114	1.11917
LOC_Os09g32430	AlamoCTG02818_at	AlamCTG02818	135.259	36.377	91.654	55.3955	0.268943	0.604398
LOC_Os09g31518	KanlowCTG30166_at	KanlCTG30166	177.149	36.7476	43.5937	40.9691	0.207439	0.939793
LOC_Os09g31502	KanlowCTG37161_at	KanlCTG37161	15.4018	5.08747	34.9105	5.2115	0.330316	0.149282
LOC_Os09g31502	KanlowCTG35650RC_s_at	KanlCTG35650-RC	33.3717	14.774	90.1971	52.1953	0.442709	0.578681
LOC_Os09g31502	KanlowCTG21568_at	KanlCTG21568	787.183	331.993	350.923	1074.94	0.421748	3.06317
LOC_Os09g31478	AP13CTG32405_at	AP13CTG32405	151.802	62.0349	109.203	64.8419	0.408656	0.593775
LOC_Os09g31230	AP13CTG27464_s_at	AP13CTG27464	136.252	63.1189	488.193	363.787	0.46325	0.74517
LOC_Os09g30486	OTHSWSLT30710_s_at	OthsSGLT30710	86.9597	35.389	1413.45	1054.41	0.406959	0.74598
LOC_Os09g30474	AlamoCTG06784_at	AlamCTG06784	94.3799	25.6619	49.4336	31.6844	0.271899	0.640949
LOC_Os09g30350	AP13CTG05464_at	AP13CTG05464	364.087	152.742	231.556	151.766	0.419521	0.655417
LOC_Os09g30130	KanlowCTG42918_at	KanlCTG42918	33.8644	15.1547	55.5911	48.6516	0.447513	0.875169
LOC_Os09g30130	KanlowCTG46799_s_at	KanlCTG46799	191.5	70.6914	51.0624	55.3805	0.369146	1.08457
LOC_Os09g30130	AP13CTG57305_s_at	AP13CTG57305	36.7592	13.0864	58.3252	51.6719	0.356004	0.885927
LOC_Os09g30130	KanlowCTG43501_at	KanlCTG43501	56.8914	18.0948	58.3807	21.4049	0.318058	0.366644
LOC_Os09g30070	KanlowCTG25229_at	KanlCTG25229	85.6294	41.707	359.547	333.344	0.487064	0.927122
LOC_Os09g29150	AlamoCTG10988_s_at	AlamCTG10988	582.641	174.258	413.04	144.821	0.299082	0.350622
LOC_Os09g29060	AP13ITG40508_at	AP13ISTG40508	96.4878	42.3881	44.9811	43.2926	0.439311	0.962462
LOC_Os09g28910	KanlowCTG02933_x_at	KanlCTG02933	308.954	144.654	219.044	144.508	0.468206	0.659722
LOC_Os09g28690	AP13ITG55805_at	AP13ISTG55805	291.237	135.444	1278.29	1184.7	0.465065	0.926788
LOC_Os09g28450	OTHSWCTG16306_at	OthsCTG16306	60.1295	29.9288	77.7159	55.9359	0.49774	0.719748
LOC_Os09g28110	AlamoCTG14501_at	AlamCTG14501	113.796	41.4833	91.0209	64.2874	0.364539	0.706293
LOC_Os09g27610	AP13CTG05841_at	AP13CTG05841	31.1369	11.7603	48.1864	30.2804	0.377695	0.628401
LOC_Os09g27580	KanlowCTG19215_s_at	KanlCTG19215	54.7742	20.1199	35.0273	43.0453	0.367325	1.22891
LOC_Os09g26999	AP13ITG72266_s_at	AP13ISTG72266	82.7032	40.9298	333.046	350.009	0.494899	1.05093
LOC_Os09g26960	KanlowCTG12490_s_at	KanlCTG12490	255.797	32.9216	148.07	55.8237	0.128702	0.377008
LOC_Os09g26780	KanlowCTG41887_s_at	KanlCTG41887	999.607	378.835	1473.55	1759.4	0.378984	1.19399
LOC_Os09g26680	AP13CTG26692_x_at	AP13CTG26692	60.3821	18.7366	8.8459	10.2449	0.3103	1.15815
LOC_Os09g25625	VS16ITG23094_s_at	VS16ISTG23094	1478.58	584.085	2113.2	1847.36	0.39503	0.874197
LOC_Os09g25625	AP13CTG02684_s_at	AP13CTG02684	2241.17	962.903	3199.13	2693.02	0.429644	0.841798
LOC_Os09g25625	AP13CTG22598_at	AP13CTG22598	167.988	81.244	231.519	330.746	0.483629	1.42859
LOC_Os09g25580	AP13ITG51959_x_at	AP13ISTG51959	100.436	50.0544	54.0305	50.4122	0.498369	0.933033
LOC_Os09g25580	AP13ITG35753_s_at	AP13ISTG35753	979.464	388.845	299.086	178.157	0.396998	0.595671
LOC_Os09g25460	AP13ITG74189_at	AP13ISTG74189	4359.76	2113.2	2411.48	2656.33	0.484706	1.10153
LOC_Os09g25460	AP13ITG77430_at	AP13ISTG77430	450.376	209.886	145.04	150.717	0.466025	1.03914
LOC_Os09g25430	AP13CTG10609_at	AP13CTG10609	50.2522	23.2231	5.98109	4.77329	0.462132	0.798064
LOC_Os09g25000	KanlowCTG43768_at	KanlCTG43768	49.9252	15.406	261.436	222.866	0.308582	0.852471
LOC_Os09g24954	AP13ITG36716_s_at	AP13ISTG36716	626.127	87.561	355.838	185.653	0.139845	0.521734
LOC_Os09g24900	AP13CTG17211_at	AP13CTG17211	81.6679	21.4089	12.8005	18.7014	0.262146	1.461
LOC_Os09g24530	AP13CTG08755_s_at	AP13CTG08755	377.422	104.691	320.915	221.343	0.277386	0.689724
LOC_Os09g24530	OTHSWCTG11645_s_at	OthsCTG11645	266.218	69.3961	208.81	151.171	0.260674	0.723962
LOC_Os09g23140	OTHSWCTG36819_s_at	OthsCTG36819	52.7111	23.7031	22.9245	19.2401	0.449679	0.839284
LOC_Os09g22050	AP13ITG62491_at	AP13ISTG62491	56.5595	13.7453	55.2043	26.6412	0.243024	0.482593
LOC_Os09g21460	AP13ITG60293_s_at	AP13ISTG60293	637.121	285.175	776.047	748.028	0.447599	0.963895
LOC_Os09g20830	KanlowCTG37209_at	KanlCTG37209	103.567	41.404	64.6682	32.0769	0.399781	0.496023
LOC_Os09g20830	AP13CTG31977_at	AP13CTG31977	169.043	80.0767	122.397	65.2929	0.473706	0.533452
LOC_Os09g20000	AP13ITG60424_s_at	AP13ISTG60424	491.249	154.387	41.724	52.7576	0.314274	1.26444
LOC_Os09g19930	KanlowCTG02222_s_at	KanlCTG02222	133.439	47.8671	1687.08	1409.77	0.358719	0.83563
LOC_Os09g19900	KanlowSLT49783_at	KanlSGLT49783	74.5591	28.7443	51.9954	38.08	0.385523	0.732372
LOC_Os09g19790	AlamoCTG13082_s_at	AlamCTG13082	461.717	221.407	282.257	130.843	0.479528	0.463561
LOC_Os09g19710	AP13CTG07939_at	AP13CTG07939	377.739	156.07	110.39	76.5391	0.413168	0.693353
LOC_Os09g18450	AP13ITG42815_s_at	AP13ISTG42815	1752.52	371.038	520.953	506.951	0.211717	0.973122
LOC_Os09g17600	AP13CTG10666_s_at	AP13CTG10666	2836.98	1217.78	463.045	410.158	0.429252	0.885783
LOC_Os09g17600	AP13CTG19564_at	AP13CTG19564	79.3432	38.5361	38.4914	22.7193	0.485689	0.590245
LOC_Os09g15850	KanlowCTG42042_s_at	KanlCTG42042	102.559	24.9357	46.4132	44.787	0.243135	0.964963
LOC_Os09g15170	AP13CTG19012_s_at	AP13CTG19012	110.927	54.4063	384.843	306.465	0.490471	0.796338
LOC_Os09g10930	AP13CTG08964_at	AP13CTG08964	38.8234	16.464	13.977	13.9178	0.424076	0.995759
LOC_Os09g10600	AP13CTG29153_s_at	AP13CTG29153	73.545	25.9921	93.4452	29.9604	0.353418	0.32062
LOC_Os09g10600	AP13CTG29817_s_at	AP13CTG29817	56.2659	24.761	71.0598	27.9558	0.440072	0.393413
LOC_Os09g10340	KanlowCTG08479RC_s_at	KanlCTG08479-RC	172.649	39.8622	2743.3	2857.05	0.230886	1.04146
LOC_Os09g08910	AP13CTG22518_at	AP13CTG22518	401.861	24.2513	8452.82	1531.06	0.0603475	0.18113
LOC_Os09g07830	AP13CTG00200RC_at	AP13CTG00200-RC	319.603	138.354	584.576	465.071	0.432892	0.795569
LOC_Os09g07160	AlamoCTG07701_at	AlamCTG07701	96.0015	37.1802	50.9192	37.6667	0.387288	0.739734
LOC_Os09g07020	KanlowCTG31979_at	KanlCTG31979	30.1707	14.591	18.1614	12.5866	0.483613	0.693041
LOC_Os09g04790	KanlowCTG03491_at	KanlCTG03491	55.9416	9.56326	179.157	244.162	0.170951	1.36284
LOC_Os09g04710	KanlowCTG42407_s_at	KanlCTG42407	66.2376	24.6826	916.858	598.418	0.372638	0.652683
LOC_Os09g03939	AP13CTG13391_s_at	AP13CTG13391	138.688	43.2926	47.8487	38.7386	0.312158	0.809607
LOC_Os09g03160	AP13CTG22712_s_at	AP13CTG22712	31.1159	11.6497	34.6963	24.6874	0.374396	0.711528
LOC_Os09g02660	KanlowCTG36736_at	KanlCTG36736	72.2646	24.3393	251.616	136.897	0.336808	0.544072
LOC_Os09g02360	AP13ITG73961_at	AP13ISTG73961	63.5961	31.3414	1463.72	1266.35	0.49282	0.86516
LOC_Os09g02284	KanlowCTG26387_at	KanlCTG26387	22.5883	7.68107	21.4875	7.91207	0.340047	0.368218
LOC_Os09g01300	AP13CTG30882_at	AP13CTG30882	146.523	73.0106	80.1941	68.699	0.498287	0.856659
LOC_Os09g01300	KanlowCTG46506_at	KanlCTG46506	41.4572	20.3856	12.8654	15.409	0.491726	1.19771
LOC_Os08g44360	AP13CTG24895_at	AP13CTG24895	157.586	49.4335	1090.15	1109.77	0.313691	1.018
LOC_Os08g44290	AP13CTG06968_x_at	AP13CTG06968	926.357	462.338	2006.05	1714.37	0.499093	0.854602
LOC_Os08g43760	KanlowCTG47129_at	KanlCTG47129	68.1606	31.7118	108.425	23.019	0.465251	0.212304
LOC_Os08g43500	AlamoCTG12552_at	AlamCTG12552	494.154	86.6392	329.747	55.9842	0.175328	0.169779
LOC_Os08g43490	AP13ITG45354_s_at	AP13ISTG45354	427.729	188.109	178.475	148.113	0.439785	0.829881
LOC_Os08g43490	AP13ITG58894_at	AP13ISTG58894	295.132	131.142	35.5384	31.4134	0.44435	0.88393
LOC_Os08g43350	AP13ITG67371_at	AP13ISTG67371	63.6327	30.8156	852.177	932.532	0.484272	1.09429
LOC_Os08g43290	KanlowCTG05398_s_at	KanlCTG05398	459.869	83.688	314.267	80.1697	0.181982	0.2551
LOC_Os08g43040	KanlowCTG03653_at	KanlCTG03653	76.385	31.7529	1274.06	711.642	0.415696	0.558563
LOC_Os08g42730	KanlowCTG31077_at	KanlCTG31077	43.6377	20.7251	20.3235	13.1372	0.474937	0.646405
LOC_Os08g42670	AlamoCTG04044_at	AlamCTG04044	110.703	54.2772	96.5673	46.7226	0.490294	0.483834
LOC_Os08g42470	AP13CTG04979_at	AP13CTG04979	59.1714	19.5627	290.081	178.531	0.330611	0.615454
LOC_Os08g42440	AlamoCTG12810_at	AlamCTG12810	518.722	75.4854	78.9144	58.6914	0.145522	0.743735
LOC_Os08g42110	AP13ITG45154_s_at	AP13ISTG45154	109.179	23.6772	75.8683	33.6214	0.216865	0.443155
LOC_Os08g42040	KanlowCTG03543_s_at	KanlCTG03543	266.929	105.893	1912	2702.61	0.396709	1.4135
LOC_Os08g42010	AP13CTG71226_at	AP13CTG71226	537.468	173.662	469.509	310.177	0.323111	0.660642
LOC_Os08g41710	AP13CTG18178_at	AP13CTG18178	104.943	26.5359	141.057	69.5928	0.25286	0.493365
LOC_Os08g41390	AP13CTG16773_s_at	AP13CTG16773	193.609	37.9017	81.5481	38.72	0.195764	0.474813
LOC_Os08g41190	AlamoCTG07188_at	AlamCTG07188	52.5808	21.1852	39.8201	36.1757	0.402908	0.908478
LOC_Os08g41100	AP13ITG77205_at	AP13ISTG77205	41.6429	19.9072	43.0453	44.4798	0.478044	1.03333
LOC_Os08g40180	KanlowCTG43121_s_at	KanlCTG43121	484.486	159.733	1957.79	2013.8	0.329695	1.02861
LOC_Os08g40170	AP13CTG15523_at	AP13CTG15523	33.1571	15.9668	472.775	377.422	0.481549	0.798313
LOC_Os08g40160	AP13CTG12793_s_at	AP13CTG12793	697.403	130.238	293.262	184.583	0.186747	0.629412
LOC_Os08g40140	OTHSWSLT27877_at	OthsSGLT27877	120.726	26.1754	71.8751	30.7031	0.216817	0.427173
LOC_Os08g40140	OTHSWSLT27876_s_at	OthsSGLT27876	393.478	56.5595	249	130.37	0.143743	0.523573
LOC_Os08g40140	OTHSWSLT27876_at	OthsSGLT27876	168.362	16.3927	74.8058	31.4928	0.0973659	0.420994
LOC_Os08g40140	KanlowCTG44272_at	KanlCTG44272	76.7049	14.3942	53.4018	18.9393	0.187657	0.354656
LOC_Os08g39370	AP13ITG64714RC_at	AP13ISTG64714-RC	209.383	96.6311	42.8525	37.8514	0.461504	0.883295
LOC_Os08g39370	AP13ITG40473_at	AP13ISTG40473	20.2696	9.84109	12.1161	10.3852	0.485509	0.857144
LOC_Os08g39350	KanlowCTG40708_x_at	KanlCTG40708	615.241	223.743	264.189	221.407	0.363668	0.838063
LOC_Os08g39310	KanlowCTG20039_s_at	KanlCTG20039	221.343	81.3136	292.043	171.259	0.367365	0.586417
LOC_Os08g39300	AP13ITG40105_at	AP13ISTG40105	12.5778	5.95903	9.55133	7.28645	0.473775	0.762873
LOC_Os08g39150	AP13CTG13743_s_at	AP13CTG13743	304.713	82.2689	69.9445	232.526	0.269988	3.32443
LOC_Os08g39080	AP13CTG25323_at	AP13CTG25323	174.425	48.0085	131.276	113.775	0.275238	0.86668
LOC_Os08g38990	AP13CTG04909_at	AP13CTG04909	193.047	83.2939	260.551	311.021	0.43147	1.1937
LOC_Os08g38810	AP13CTG18845_at	AP13CTG18845	115.363	24.0759	15.3482	15.6948	0.208697	1.02259
LOC_Os08g38410	AP13CTG08567_at	AP13CTG08567	181.78	83.3579	66.001	84.2418	0.458565	1.27637
LOC_Os08g38300	KanlowCTG02079_at	KanlCTG02079	1494.05	382.691	5618.81	4544.8	0.256144	0.808854
LOC_Os08g36490	KanlowCTG45743_s_at	KanlCTG45743	42.0142	13.8022	92.2516	99.4602	0.328513	1.07814
LOC_Os08g36490	AP13CTG06925_at	AP13CTG06925	119.176	54.0123	385.797	324.041	0.453215	0.839928
LOC_Os08g36420	AP13CTG11061_at	AP13CTG11061	18.4664	7.21624	11.1582	8.82054	0.390777	0.790497
LOC_Os08g36020	AP13CTG11256_at	AP13CTG11256	229.572	109.991	389.485	420.343	0.479114	1.07923
LOC_Os08g35960	AP13ITG43393_s_at	AP13ISTG43393	72.5533	32.9516	35.6913	23.6942	0.45417	0.663865
LOC_Os08g35960	KanlowCTG39039RC_at	KanlCTG39039-RC	209.972	71.5266	45.6635	19.7457	0.340648	0.432417
LOC_Os08g35960	AlamoCTG12698_s_at	AlamCTG12698	588.36	212.816	184.273	103.279	0.361711	0.560469
LOC_Os08g35960	AlamoCTG12698_at	AlamCTG12698	574.123	243.969	158.927	70.5419	0.424942	0.443865
LOC_Os08g35960	OTHSWSLT32595_at	OthsSGLT32595	19.8658	7.97359	11.6728	9.35297	0.401372	0.801262
LOC_Os08g35090	KanlowCTG41543_s_at	KanlCTG41543	88.0537	31.4245	704.277	729.271	0.356879	1.03549
LOC_Os08g34984	AP13ITG55985_at	AP13ISTG55985	98.5152	39.0373	9.89557	8.72663	0.396257	0.881873
LOC_Os08g34970	KanlowCTG05830_at	KanlCTG05830	457.46	64.2257	299.252	285.079	0.140396	0.952638
LOC_Os08g34900	AP13ITG68961_s_at	AP13ISTG68961	505.934	214.536	1652.16	1601.36	0.42404	0.969249
LOC_Os08g34700	AP13ITG57242_at	AP13ISTG57242	690.409	236.92	27.8928	14.8133	0.343159	0.531078
LOC_Os08g34240	AP13CTG21322_s_at	AP13CTG21322	117.863	27.7317	88.9538	61.6242	0.235287	0.692766
LOC_Os08g33740	KanlowCTG45767_s_at	KanlCTG45767	67.448	33.4102	134.189	98.7495	0.495348	0.735897
LOC_Os08g33720	AP13CTG07488_s_at	AP13CTG07488	1572.47	755.715	745.579	823.386	0.48059	1.10436
LOC_Os08g33488	AP13ITG57957_at	AP13ISTG57957	307.446	132.094	212.311	103.659	0.42965	0.488242
LOC_Os08g32970	AP13CTG29433_s_at	AP13CTG29433	196.838	88.3394	32.5247	19.3305	0.448792	0.594333
LOC_Os08g32170	AP13CTG10284_at	AP13CTG10284	120.363	48.0208	2328.22	1205.22	0.398967	0.517657
LOC_Os08g32120	AP13CTG12043_at	AP13CTG12043	184.273	90.7272	673.578	526.508	0.492352	0.781658
LOC_Os08g32060	AP13ITG38006_s_at	AP13ISTG38006	3666.11	788.771	1093.76	1027.86	0.215152	0.939748
LOC_Os08g31340	AP13ITG41959_at	AP13ISTG41959	59.5879	19.4605	233.133	187.421	0.326584	0.803923
LOC_Os08g31228	AP13CTG06995_at	AP13CTG06995	87.0752	33.0882	153.277	128.028	0.379995	0.835273
LOC_Os08g30770	KanlowCTG45263_at	KanlCTG45263	302.334	62.6965	194.948	167.159	0.207375	0.857453
LOC_Os08g30740	AP13CTG29336_at	AP13CTG29336	293.445	134.85	82.6428	76.6552	0.459542	0.927548
LOC_Os08g30710	AlamoCTG08172_at	AlamCTG08172	268.734	39.8201	177.298	113.796	0.148177	0.641836
LOC_Os08g28860	AP13ITG41552_at	AP13ISTG41552	1309.88	576.03	768.394	630.407	0.439759	0.820421
LOC_Os08g28640	AlamoCTG02670_s_at	AlamCTG02670	283.273	130.891	133.262	83.0102	0.462065	0.622908
LOC_Os08g28600	AP13CTG12986_at	AP13CTG12986	407.324	97.6806	79.2763	29.5833	0.23981	0.373167
LOC_Os08g27090	AP13ITG73686_at	AP13ISTG73686	479.366	94.0725	489.588	359.961	0.196244	0.735233
LOC_Os08g27090	AP13ITG41810_x_at	AP13ISTG41810	747.023	354.724	849.55	507.683	0.474851	0.597591
LOC_Os08g26880	KanlowCTG31543_s_at	KanlCTG31543	60.474	8.17489	6.97796	6.82698	0.13518	0.978363
LOC_Os08g26820	AP13CTG24578RC_at	AP13CTG24578-RC	240.206	117.068	105.098	90.5917	0.487365	0.861976
LOC_Os08g25460	OTHSWCTG22082_at	OthsCTG22082	110.469	22.2613	132.469	131.611	0.201515	0.993521
LOC_Os08g25260	AP13ITG62662RC_at	AP13ISTG62662-RC	423.572	21.5897	326.358	110.663	0.0509707	0.339086
LOC_Os08g25010	AP13ITG47492_at	AP13ISTG47492	18.1113	8.08949	9.23085	10.4107	0.446654	1.12782
LOC_Os08g23290	OTHSWSLT23632_at	OthsSGLT23632	92.0908	16.0275	47.1154	37.1427	0.17404	0.788336
LOC_Os08g23150	AP13CTG12424_at	AP13CTG12424	2633.87	800.87	1340.74	1261.45	0.304066	0.940858
LOC_Os08g23150	AP13CTG06562_at	AP13CTG06562	146.711	69.9792	250.181	330.969	0.476988	1.32292
LOC_Os08g20492	AP13ITG37873_s_at	AP13ISTG37873	530.374	21.265	411.594	194.016	0.0400943	0.471378
LOC_Os08g20400	AP13CTG35004_s_at	AP13CTG35004	764.369	106.527	272.479	141.779	0.139366	0.520331
LOC_Os08g20400	AP13CTG35002_s_at	AP13CTG35002	427.822	106.122	201.562	141.074	0.248052	0.699906
LOC_Os08g18044	KanlowSLT52854_at	KanlSGLT52854	111.772	45.0529	43.7227	20.5082	0.403079	0.46905
LOC_Os08g16660	AP13ITG70706RC_s_at	AP13ISTG70706-RC	105.911	36.8862	856.137	1042.96	0.348275	1.21821
LOC_Os08g16010	AP13ITG59387_at	AP13ISTG59387	150.253	61.2867	163.395	79.6159	0.407891	0.487261
LOC_Os08g14830	OTHSWSLT33635_at	OthsSGLT33635	91.4694	44.5097	35.3635	31.4245	0.486608	0.888614
LOC_Os08g14640	KanlowCTG17866_at	KanlCTG17866	1370.86	583.593	332.009	214.199	0.425712	0.645159
LOC_Os08g14440	AP13CTG04055_at	AP13CTG04055	840.485	159.501	849.407	374.014	0.189772	0.440324
LOC_Os08g13570	AP13CTG16199_at	AP13CTG16199	66.1709	28.3443	40.9829	31.0355	0.428349	0.757281
LOC_Os08g12020	AlamoCTG12289_at	AlamCTG12289	63.3025	24.5603	60.4981	103.614	0.387983	1.71269
LOC_Os08g10310	AP13CTG06237_at	AP13CTG06237	923.142	263.222	286.197	146.99	0.285138	0.513598
LOC_Os08g10310	AP13CTG06237_s_at	AP13CTG06237	922.969	314.507	435.794	207.215	0.340756	0.475489
LOC_Os08g10030	KanlowCTG16014_at	KanlCTG16014	464.514	194.686	319.949	207.577	0.419118	0.648782
LOC_Os08g09950	AP13CTG22101_s_at	AP13CTG22101	29.0176	9.31047	1136.19	932.8	0.320856	0.820987
LOC_Os08g09940	AlamoCTG14400_s_at	AlamCTG14400	81.3019	36.8149	45.1961	27.5174	0.452817	0.608846
LOC_Os08g09450	AP13ITG52966_s_at	AP13ISTG52966	59.0273	29.4078	221.146	164.85	0.498206	0.745435
LOC_Os08g09250	AP13CTG00865_at	AP13CTG00865	820.315	15.6767	1414.47	562.227	0.0191106	0.397482
LOC_Os08g09240	KanlowCTG14492_s_at	KanlCTG14492	1872.25	23.4259	1025.57	313.906	0.0125122	0.306078
LOC_Os08g09230	AP13ITG76620_at	AP13ISTG76620	23.7002	11.3396	25.3042	17.609	0.478461	0.695892
LOC_Os08g09010	AP13CTG03338_at	AP13CTG03338	28.8164	14.231	118.013	192.015	0.49385	1.62707
LOC_Os08g08990	OTHSWCTG07807_at	OthsCTG07807	102.199	15.0854	28.4539	20.1359	0.147609	0.707667
LOC_Os08g08990	AP13ITG70820_s_at	AP13ISTG70820	87.435	18.281	18.6357	16.1872	0.209081	0.868611
LOC_Os08g08820	KanlowCTG47167_s_at	KanlCTG47167	69.0723	18.2023	307.744	321.407	0.263525	1.0444
LOC_Os08g08820	KanlowCTG03522_x_at	KanlCTG03522	926.224	312.455	4624.93	4211.15	0.337342	0.910533
LOC_Os08g08220	KanlowCTG43533_s_at	KanlCTG43533	381.873	164.026	92.7373	57.316	0.429531	0.618047
LOC_Os08g08220	AP13CTG16304_s_at	AP13CTG16304	694.999	309.805	174.92	108.383	0.445763	0.619616
LOC_Os08g07880	AP13CTG27110_s_at	AP13CTG27110	52.8923	25.2122	40.5392	21.4129	0.47667	0.528202
LOC_Os08g07380	AP13CTG04146_at	AP13CTG04146	519.493	223.911	213.505	58.5856	0.431018	0.274399
LOC_Os08g07330	AP13CTG09812_s_at	AP13CTG09812	306.761	34.6756	952.126	57.5084	0.113038	0.0604
LOC_Os08g06530	KanlowCTG23080_at	KanlCTG23080	55.0349	21.0453	230.809	114.967	0.382399	0.498106
LOC_Os08g06480	AP13ITG75245_s_at	AP13ISTG75245	49.8361	23.3003	67.6683	23.7666	0.467538	0.351223
LOC_Os08g06460	AP13CTG22479_at	AP13CTG22479	317.373	123.667	167.875	153.921	0.389657	0.916877
LOC_Os08g06110	KanlowCTG21800_s_at	KanlCTG21800	4083.81	1906.17	13328.4	10441.2	0.466763	0.783379
LOC_Os08g06010	AP13CTG04312_s_at	AP13CTG04312	1188.74	427.215	1339.52	1374.8	0.359385	1.02634
LOC_Os08g05890	AlamoCTG09170_at	AlamCTG09170	519.946	123.752	949.031	437.063	0.238009	0.460536
LOC_Os08g04590	AP13CTG10236_s_at	AP13CTG10236	174.551	10.8303	81.7307	9.6613	0.0620468	0.118209
LOC_Os08g04590	AP13CTG09644_at	AP13CTG09644	614.052	142.539	423.45	299.223	0.232129	0.706631
LOC_Os08g04590	KanlowCTG46140_s_at	KanlCTG46140	570.075	239.699	543.154	284.077	0.420468	0.523014
LOC_Os08g04590	AP13CTG04420_at	AP13CTG04420	1398.96	576.085	1119.1	670.986	0.411796	0.599575
LOC_Os08g04570	KanlowCTG41538_s_at	KanlCTG41538	1196.89	355.133	1010.51	671.066	0.296713	0.664088
LOC_Os08g04500	AlamoCTG11840_s_at	AlamCTG11840	581.669	76.9422	27.7654	27.0965	0.132278	0.975909
LOC_Os08g04500	KanlowCTG44591_s_at	KanlCTG44591	4054.83	747.131	106.894	122.626	0.184257	1.14718
LOC_Os08g03570	AP13CTG05449_at	AP13CTG05449	129.345	58.0812	188.055	135.001	0.449042	0.717883
LOC_Os08g03350	AP13CTG10274_at	AP13CTG10274	83.1777	38.3191	178.544	293.558	0.46069	1.64418
LOC_Os08g03290	AlamoCTG11807_at	AlamCTG11807	56.0568	25.9919	33.7531	28.7519	0.463672	0.851831
LOC_Os08g02250	AP13ITG77517_at	AP13ISTG77517	2695.74	1046.42	1009.93	740.162	0.388176	0.732887
LOC_Os08g01940	KanlowCTG19060_at	KanlCTG19060	113.531	54.4488	205.094	435.627	0.479592	2.12404
LOC_Os08g01620	AP13CTG27655_at	AP13CTG27655	237.212	104.51	139.316	71.28	0.440578	0.511642
LOC_Os08g01620	AP13CTG05206_at	AP13CTG05206	50.0886	11.2477	32.4685	9.61315	0.224555	0.296076
LOC_Os08g01510	KanlowCTG19751_s_at	KanlCTG19751	168.338	48.0007	50.388	28.5419	0.285145	0.566442
LOC_Os08g01510	AP13CTG29778_at	AP13CTG29778	143.044	14.437	17.6309	12.1685	0.100927	0.690179
LOC_Os08g01510	AP13ITG38902_s_at	AP13ISTG38902	69.7929	32.5689	160.913	123.747	0.466651	0.769028
LOC_Os08g01490	AP13CTG27032_s_at	AP13CTG27032	76.7081	32.6849	30.0655	26.3093	0.426095	0.875069
LOC_Os08g01450	AP13CTG23980_at	AP13CTG23980	939.018	287.02	508.512	550.683	0.30566	1.08293
LOC_Os07g49400	KanlowCTG08520_at	KanlCTG08520	411.341	161.457	205.073	124.503	0.392515	0.607115
LOC_Os07g49010	AP13CTG32096_s_at	AP13CTG32096	298.752	149.261	239.699	146.523	0.499616	0.611281
LOC_Os07g48870	KanlowCTG47123_at	KanlCTG47123	37.1644	7.44282	9.36286	6.75909	0.200267	0.721905
LOC_Os07g48870	KanlowCTG47123_s_at	KanlCTG47123	164.325	44.499	55.5228	47.4431	0.270799	0.854479
LOC_Os07g48870	AP13ITG76086_at	AP13ISTG76086	279.212	61.0875	108.949	84.4724	0.218785	0.775343
LOC_Os07g48450	KanlowCTG35681_at	KanlCTG35681	86.5732	30.3258	116.442	67.3362	0.350291	0.578283
LOC_Os07g48410	KanlowCTG44289_s_at	KanlCTG44289	972.833	477.897	677.97	380.622	0.491242	0.561415
LOC_Os07g48410	AP13CTG24068_s_at	AP13CTG24068	119.703	52.7149	74.044	41.8179	0.440382	0.56477
LOC_Os07g48270	AP13CTG28360_at	AP13CTG28360	187.475	33.499	179.234	42.3731	0.178685	0.236412
LOC_Os07g48200	KanlowSLT55061_at	KanlSGLT55061	48.1815	22.3293	32.0931	24.35	0.463441	0.758731
LOC_Os07g48030	OTHSWCTG11822_at	OthsCTG11822	225.476	34.0159	348.75	342.542	0.150863	0.982201
LOC_Os07g48030	OTHSWCTG11822_s_at	OthsCTG11822	335.025	55.5308	439.85	421.719	0.165751	0.95878
LOC_Os07g48030	KanlowCTG12983_at	KanlCTG12983	149.892	55.3423	101.482	39.4733	0.369214	0.388969
LOC_Os07g48010	KanlowCTG38403_s_at	KanlCTG38403	384.068	47.5059	440.864	430.704	0.123691	0.976956
LOC_Os07g47350	KanlowCTG19429_s_at	KanlCTG19429	752.978	373.529	265.187	238.948	0.49607	0.901056
LOC_Os07g47300	AP13CTG03478_at	AP13CTG03478	71.2594	29.9152	89.2829	51.6595	0.419807	0.578605
LOC_Os07g47210	KanlowCTG38236_s_at	KanlCTG38236	542.026	176.074	211.833	81.8595	0.324844	0.386434
LOC_Os07g47110	AP13CTG11735_at	AP13CTG11735	372.539	124.512	128.049	69.5307	0.334225	0.543
LOC_Os07g47110	AP13CTG11735_s_at	AP13CTG11735	119.842	40.2718	34.5652	21.4074	0.336042	0.619333
LOC_Os07g47110	OTHSWCTG37446_s_at	OthsCTG37446	32.1508	13.4853	11.679	10.127	0.419438	0.867112
LOC_Os07g47100	KanlowCTG34457_at	KanlCTG34457	299.209	141.983	165.564	92.9334	0.47453	0.561313
LOC_Os07g47030	AP13ITG73430_at	AP13ISTG73430	363.926	97.5116	208.062	135.311	0.267943	0.650343
LOC_Os07g46840	AP13CTG59006_at	AP13CTG59006	343.333	92.8576	438.088	376.29	0.27046	0.858937
LOC_Os07g46840	AP13ITG43451RC_s_at	AP13ISTG43451-RC	355.278	34.192	432.036	434.044	0.0962401	1.00465
LOC_Os07g46780	AP13ITG49080_at	AP13ISTG49080	57.117	9.08709	23.5974	13.9328	0.159096	0.590437
LOC_Os07g46780	KanlowCTG24565_s_at	KanlCTG24565	566.137	78.3693	314.401	176.682	0.138428	0.561962
LOC_Os07g46780	AP13CTG20338RC_s_at	AP13CTG20338-RC	1374.8	140.191	596.473	247.077	0.101972	0.414231
LOC_Os07g46780	KanlowCTG15234_s_at	KanlCTG15234	1176.72	128.197	447.272	205.079	0.108944	0.45851
LOC_Os07g46690	KanlowCTG11063_at	KanlCTG11063	196.135	75.5853	118.127	66.9981	0.385374	0.567172
LOC_Os07g46690	AP13CTG09813_at	AP13CTG09813	205.094	82.5222	120.677	110.31	0.402363	0.914095
LOC_Os07g46620	AlamoCTG14043_s_at	AlamCTG14043	1992.19	541.401	1309.69	795.096	0.271762	0.607087
LOC_Os07g46480	AP13ITG59997_at	AP13ISTG59997	580.538	181.037	6230.27	6585.19	0.311843	1.05697
LOC_Os07g46380	KanlowCTG04176_s_at	KanlCTG04176	605.38	258.69	145.18	97.9647	0.427318	0.674781
LOC_Os07g46330	AP13CTG06479_at	AP13CTG06479	167.778	54.6329	125.559	85.0359	0.325626	0.677261
LOC_Os07g46280	AP13CTG13915_s_at	AP13CTG13915	282.257	40.2244	111.062	44.9272	0.14251	0.404525
LOC_Os07g46170	KanlowCTG37984_at	KanlCTG37984	2361.06	942.838	301.333	216.703	0.399329	0.719149
LOC_Os07g45060	AP13CTG23282_at	AP13CTG23282	185.313	76.4679	242.41	171.403	0.412642	0.707077
LOC_Os07g44890	AP13ITG70194_at	AP13ISTG70194	77.6076	19.7934	48.1783	22.465	0.255045	0.46629
LOC_Os07g44730	AlamoCTG04970_s_at	AlamCTG04970	279.547	99.0656	148.113	80.7273	0.354379	0.545039
LOC_Os07g44730	AP13CTG28048_s_at	AP13CTG28048	310.296	122.833	139.586	76.9273	0.395857	0.551111
LOC_Os07g44690	AP13ITG58107_at	AP13ISTG58107	169.303	26.5359	1052.81	1105.37	0.156736	1.04992
LOC_Os07g44690	KanlowCTG31602_s_at	KanlCTG31602	111.834	23.432	787.183	648.207	0.209525	0.823453
LOC_Os07g44650	AP13ITG62206_at	AP13ISTG62206	1722.16	695.399	3480.83	864.073	0.403796	0.248237
LOC_Os07g44610	AP13CTG27048_at	AP13CTG27048	365.93	165.996	165.996	140.1	0.453629	0.843993
LOC_Os07g43540	AP13CTG16725_s_at	AP13CTG16725	215.465	90.2014	110.761	59.9506	0.418637	0.54126
LOC_Os07g43050	KanlowCTG16090_s_at	KanlCTG16090	91.9143	22.1442	84.8277	25.2508	0.240922	0.297671
LOC_Os07g43010	AP13CTG20082_s_at	AP13CTG20082	1574.1	630.482	291.394	332.44	0.400535	1.14086
LOC_Os07g42960	AP13CTG13882_at	AP13CTG13882	84.4566	9.64646	42.7585	10.9976	0.114218	0.257203
LOC_Os07g42860	AP13CTG23622_at	AP13CTG23622	176.707	85.9752	260.827	174.891	0.486541	0.670525
LOC_Os07g42610	AP13ITG60432_at	AP13ISTG60432	1316.48	416.873	191.801	196.739	0.316656	1.02575
LOC_Os07g42420	AP13CTG05158_at	AP13CTG05158	225.3	104.606	1366.68	1075.01	0.464296	0.786585
LOC_Os07g42410	KanlowCTG15437_s_at	KanlCTG15437	142.526	14.9289	56.5821	44.7892	0.104745	0.791578
LOC_Os07g41460	AP13ITG70897_at	AP13ISTG70897	2305.01	1142.12	109.569	128.151	0.495497	1.16958
LOC_Os07g40986	AP13ITG39554_s_at	AP13ISTG39554	463.846	170.088	290.025	129.865	0.366691	0.447771
LOC_Os07g40986	KanlowCTG45812_s_at	KanlCTG45812	253.349	93.4721	175.512	101.186	0.368945	0.57652
LOC_Os07g40510	AP13CTG29708_s_at	AP13CTG29708	285.531	142.539	223.7	127.046	0.499208	0.567927
LOC_Os07g40510	AP13CTG07242_s_at	AP13CTG07242	284.05	136.357	122.785	128.077	0.480047	1.0431
LOC_Os07g40460	KanlowCTG41054_at	KanlCTG41054	76.7565	15.0324	23.645	14.3557	0.195845	0.607134
LOC_Os07g39980	AP13CTG01219_s_at	AP13CTG01219	113.384	54.3219	110.085	252.627	0.479095	2.29484
LOC_Os07g39840	AP13CTG01468_s_at	AP13CTG01468	141.636	50.9584	72.1768	56.7467	0.359783	0.786218
LOC_Os07g39280	AP13CTG17737_x_at	AP13CTG17737	101.579	42.6201	106.163	39.8622	0.419575	0.375481
LOC_Os07g39280	KanlowCTG46490_s_at	KanlCTG46490	33.9198	16.8341	21.6598	9.53217	0.49629	0.440086
LOC_Os07g39280	AP13CTG23163_x_at	AP13CTG23163	131.901	40.9573	155.451	21.7822	0.310516	0.140123
LOC_Os07g39280	OTHSWCTG17354_at	OthsCTG17354	50.1237	23.9182	15.4678	10.4955	0.477183	0.678536
LOC_Os07g38960	KanlowCTG05960_at	KanlCTG05960	1682.1	760.076	7211.32	6022.09	0.451861	0.835088
LOC_Os07g38830	KanlowCTG27802_s_at	KanlCTG27802	116.973	57.3311	231.634	124.527	0.490122	0.537602
LOC_Os07g38230	AP13CTG38597_s_at	AP13CTG38597	175.461	31.692	85.0379	43.2739	0.180621	0.508877
LOC_Os07g38230	OTHSWCTG18844_s_at	OthsCTG18844	841.05	354.895	524.601	308.805	0.421966	0.588648
LOC_Os07g37920	AP13CTG21412_s_at	AP13CTG21412	286.264	60.4148	13.2606	11.1436	0.211046	0.840353
LOC_Os07g37850	AP13ITG43286_s_at	AP13ISTG43286	257.787	64.4634	2538.98	1939.2	0.250065	0.763771
LOC_Os07g37850	KanlowCTG06613_s_at	KanlCTG06613	156.532	23.1558	1911.04	1351.47	0.14793	0.707192
LOC_Os07g37850	KanlowCTG09752_s_at	KanlCTG09752	173.17	85.2454	1384.56	910.962	0.492263	0.657941
LOC_Os07g37550	KanlowCTG00765_at	KanlCTG00765	455.481	116.442	1904.53	852.791	0.255645	0.447771
LOC_Os07g37510	AP13ITG71945_at	AP13ISTG71945	405.901	135.562	156.502	150.906	0.333977	0.964242
LOC_Os07g37420	KanlowCTG11724_s_at	KanlCTG11724	115.984	39.0006	812.206	697.499	0.336258	0.858772
LOC_Os07g37320	KanlowCTG03019_s_at	KanlCTG03019	886.648	226.167	79.9623	94.1539	0.255082	1.17748
LOC_Os07g37240	AP13CTG26038_at	AP13CTG26038	747.131	323.07	7473.16	5894.76	0.432414	0.78879
LOC_Os07g36940	KanlowCTG43511_s_at	KanlCTG43511	540.75	120.969	277.376	198.857	0.223705	0.716921
LOC_Os07g36870	AP13CTG20820_s_at	AP13CTG20820	172.589	68.2272	36.3784	28.686	0.395315	0.788545
LOC_Os07g36870	KanlowCTG42063_s_at	KanlCTG42063	665.135	170.072	171.292	96.1212	0.255695	0.561155
LOC_Os07g36530	AP13CTG15325_at	AP13CTG15325	592.224	175.925	362.047	301.304	0.297058	0.832224
LOC_Os07g36530	AP13CTG15325_s_at	AP13CTG15325	357.155	148.964	183	187.249	0.417084	1.02322
LOC_Os07g36530	AP13ITG46211_s_at	AP13ISTG46211	74.2433	20.4115	37.2143	22.7552	0.274926	0.611465
LOC_Os07g36530	AP13CTG12778_at	AP13CTG12778	268.753	44.5036	132.634	28.2899	0.165593	0.213293
LOC_Os07g36520	AP13ITG67283_s_at	AP13ISTG67283	643.653	96.3077	641.368	219.925	0.149627	0.342899
LOC_Os07g36470	KanlowCTG22560_s_at	KanlCTG22560	1755.64	814.942	1792.18	1362.18	0.464185	0.760065
LOC_Os07g36190	KanlowSLT51678_at	KanlSGLT51678	597.046	43.7424	443.341	56.1025	0.0732648	0.126545
LOC_Os07g36080	AP13CTG23338_at	AP13CTG23338	14.9989	7.06315	142.065	115.161	0.470912	0.810618
LOC_Os07g36080	AP13CTG23339_s_at	AP13CTG23339	958.887	447.723	7011.1	4888.17	0.46692	0.697204
LOC_Os07g35610	KanlowCTG18567_s_at	KanlCTG18567	57.4808	26.6641	277.843	273.466	0.463879	0.984246
LOC_Os07g35610	AP13CTG25403_at	AP13CTG25403	56.6427	28.0731	226.754	237.207	0.495617	1.0461
LOC_Os07g35110	KanlowCTG22482_s_at	KanlCTG22482	70.5829	15.2554	39.5735	16.307	0.216134	0.412068
LOC_Os07g35050	AP13CTG05780_x_at	AP13CTG05780	88.7237	39.3285	35.025	33.8246	0.443269	0.965728
LOC_Os07g35050	KanlowCTG46392_s_at	KanlCTG46392	29.9152	10.782	9.22819	9.47542	0.36042	1.02679
LOC_Os07g35050	AP13CTG15308_at	AP13CTG15308	119.532	11.0043	93.1101	33.9438	0.0920622	0.364556
LOC_Os07g34980	AP13CTG32578_s_at	AP13CTG32578	46.7464	14.4884	47.7341	21.2917	0.309937	0.446047
LOC_Os07g34006	AP13CTG14158_at	AP13CTG14158	546.018	243.278	67.4479	77.0382	0.44555	1.14219
LOC_Os07g33850	AP13ITG63292RC_at	AP13ISTG63292-RC	146.049	66.7623	30.6963	18.856	0.457121	0.614275
LOC_Os07g33760	AP13CTG16059_at	AP13CTG16059	218.406	70.4137	153.513	192.015	0.322399	1.25081
LOC_Os07g33730	OTHSWSLT35244_at	OthsSGLT35244	30.2855	14.0652	25.601	16.7372	0.46442	0.653772
LOC_Os07g33440	AP13ITG58844_at	AP13ISTG58844	700.516	107.893	1842.57	2385.6	0.15402	1.29472
LOC_Os07g33440	AP13ITG72766_at	AP13ISTG72766	67.4548	28.9572	127.119	168.848	0.429283	1.32827
LOC_Os07g33200	KanlowCTG25258_at	KanlCTG25258	134.254	66.4906	75.2418	25.8718	0.495261	0.343849
LOC_Os07g32670	AP13CTG37093_at	AP13CTG37093	65.3511	14.0765	9.61315	8.95978	0.215398	0.932034
LOC_Os07g32660	KanlowCTG23591_s_at	KanlCTG23591	392.609	58.8917	134.189	119.245	0.150001	0.888632
LOC_Os07g32480	KanlowCTG20764_s_at	KanlCTG20764	76.396	30.3913	115.496	108.142	0.397813	0.936327
LOC_Os07g32380	AP13CTG07601_s_at	AP13CTG07601	266.897	129.432	231.391	176.682	0.484951	0.763563
LOC_Os07g32350	OTHSWSLT25392_at	OthsSGLT25392	98.3813	28.6601	67.7288	29.7539	0.291316	0.43931
LOC_Os07g32170	KanlowCTG41639_s_at	KanlCTG41639	2978.88	1384.76	683.834	491.721	0.464861	0.719065
LOC_Os07g32090	AP13ITG36173_s_at	AP13ISTG36173	88.7274	22.1958	216.788	36.9077	0.250158	0.170248
LOC_Os07g32090	AP13ITG36172_s_at	AP13ISTG36172	63.0375	22.0869	200.91	38.187	0.350377	0.19007
LOC_Os07g31960	AP13ITG77481_at	AP13ISTG77481	291.022	90.9161	179.157	211.603	0.312403	1.18111
LOC_Os07g31370	KanlowCTG45159_at	KanlCTG45159	726.584	216.85	305.491	193.76	0.298452	0.634258
LOC_Os07g31370	AP13ITG52896_at	AP13ISTG52896	332.186	110.791	117.829	78.4765	0.333521	0.666019
LOC_Os07g30240	AP13ITG38858_s_at	AP13ISTG38858	99.58	34.1783	61.1809	45.9406	0.343225	0.750898
LOC_Os07g30240	AP13ITG38858_at	AP13ISTG38858	48.8003	18.8333	23.6942	17.2105	0.385927	0.726358
LOC_Os07g28890	AP13CTG19609_at	AP13CTG19609	28.9445	13.3287	6.41841	7.75748	0.460492	1.20863
LOC_Os07g28460	AP13CTG21505_at	AP13CTG21505	54.2386	20.7944	50.1073	25.6644	0.383388	0.512189
LOC_Os07g27320	KanlowCTG30054_at	KanlCTG30054	25.805	12.8957	11.8861	47.29	0.499736	3.97861
LOC_Os07g26550	AlamoSLT16850_at	AlamSGLT16850	125.929	55.9654	82.7821	43.7805	0.444421	0.528864
LOC_Os07g26110	AP13CTG16986_at	AP13CTG16986	56.306	17.9415	539.402	817.502	0.318643	1.51557
LOC_Os07g25810	AP13ITG59805_s_at	AP13ISTG59805	41.9971	19.0218	178.923	242.035	0.452931	1.35273
LOC_Os07g25420	AP13CTG07372_at	AP13CTG07372	42.8178	18.5637	173.75	131.611	0.433552	0.757476
LOC_Os07g25360	KanlowCTG25176_at	KanlCTG25176	140.285	49.8773	123.213	51.61	0.355543	0.418869
LOC_Os07g24190	KanlowCTG47577_s_at	KanlCTG47577	1376.19	648.064	2434.78	2249.56	0.470912	0.923924
LOC_Os07g23990	AP13ITG39966_x_at	AP13ISTG39966	50.7409	24.0845	110.661	89.6171	0.474657	0.809836
LOC_Os07g23880	AP13ITG49469_s_at	AP13ISTG49469	27.1901	8.92458	39.1583	9.82034	0.328229	0.250785
LOC_Os07g23810	AP13ITG70501_at	AP13ISTG70501	114.566	47.6723	38.1287	35.2	0.416112	0.923188
LOC_Os07g22600	OTHSWCTG17434_s_at	OthsCTG17434	823.267	367.234	237.571	300.707	0.446069	1.26576
LOC_Os07g17330	AP13ITG68549_s_at	AP13ISTG68549	82.2103	28.6436	209.79	474.972	0.348418	2.26403
LOC_Os07g17220	AP13ITG33371_s_at	AP13ISTG33371	285.421	130.702	89.729	38.4914	0.457927	0.428974
LOC_Os07g14940	AP13ITG39818_at	AP13ISTG39818	21.2636	8.45696	18.7816	9.95263	0.39772	0.529914
LOC_Os07g14150	AP13CTG64659_s_at	AP13CTG64659	3304.08	1027.86	900.766	702.047	0.311087	0.779389
LOC_Os07g14150	AP13CTG02632_at	AP13CTG02632	523.562	256	1028.6	959.209	0.488958	0.93254
LOC_Os07g14100	AP13ITG55041_at	AP13ISTG55041	35.0477	17.4566	19.2499	13.7686	0.498082	0.715254
LOC_Os07g12830	AP13CTG50518_at	AP13CTG50518	300.275	134.672	189.372	130.039	0.448497	0.686688
LOC_Os07g12810	AP13CTG03196_s_at	AP13CTG03196	1301.95	633.633	949.396	544.25	0.486678	0.573259
LOC_Os07g12200	KanlowCTG18841_at	KanlCTG18841	243.454	45.6791	517.379	2014.86	0.18763	3.89436
LOC_Os07g12110	AP13ITG50096_at	AP13ISTG50096	49.3709	20.3974	31.1257	21.6775	0.413146	0.69645
LOC_Os07g11790	KanlowCTG08343_s_at	KanlCTG08343	28.5032	9.33927	9.65017	8.87741	0.327657	0.919922
LOC_Os07g11790	AP13CTG15902_s_at	AP13CTG15902	82.8716	18.836	27.0043	19.1822	0.227292	0.710338
LOC_Os07g10720	AP13CTG17403_at	AP13CTG17403	85.113	39.2763	93.1638	53.6315	0.461461	0.575669
LOC_Os07g10500	AP13CTG59110_at	AP13CTG59110	235.782	101.799	269.701	143.068	0.431751	0.530468
LOC_Os07g10110	AP13CTG01534_at	AP13CTG01534	237.777	104.271	122.019	111.062	0.438524	0.9102
LOC_Os07g09520	AP13CTG26914_at	AP13CTG26914	69.5527	25.2965	51.2682	71.7896	0.363703	1.40028
LOC_Os07g09140	KanlowCTG26531_s_at	KanlCTG26531	40.3837	8.28709	80.6054	33.8449	0.205209	0.419883
LOC_Os07g08810	KanlowCTG14688_s_at	KanlCTG14688	520.978	253.366	159.257	152.821	0.486327	0.959587
LOC_Os07g08810	AP13CTG32290_at	AP13CTG32290	79.8951	35.2867	34.1417	33.2597	0.441663	0.974167
LOC_Os07g08410	AP13ITG55722_s_at	AP13ISTG55722	834.625	172.649	807.603	374.806	0.206858	0.464097
LOC_Os07g08040	AP13CTG12358_s_at	AP13CTG12358	214.99	94.5369	216.049	106.984	0.439727	0.495182
LOC_Os07g07900	AP13ITG40903_at	AP13ISTG40903	63.9169	31.5966	75.5853	56.2376	0.494339	0.744028
LOC_Os07g07680	KanlowCTG12954_at	KanlCTG12954	504.963	226.921	337.867	208.87	0.449382	0.618203
LOC_Os07g07340	AP13ITG62303_at	AP13ISTG62303	768.061	342.542	441.178	204.425	0.445983	0.463361
LOC_Os07g07270	AlamoCTG02122_s_at	AlamCTG02122	807.952	386.739	709.176	330.746	0.478666	0.46638
LOC_Os07g07070	AP13ITG39784_s_at	AP13ISTG39784	64.6326	32.0981	51.2535	38.3798	0.496624	0.748823
LOC_Os07g06960	KanlowCTG32695_at	KanlCTG32695	47.3399	19.1012	26.6497	19.9569	0.403489	0.748861
LOC_Os07g06880	AP13ITG39384_at	AP13ISTG39384	460.067	212.433	106.522	93.1386	0.461744	0.874359
LOC_Os07g06860	AP13ITG56844_at	AP13ISTG56844	216.01	107.099	27.3274	26.6884	0.495808	0.976616
LOC_Os07g06830	KanlowCTG47105RC_s_at	KanlCTG47105-RC	630.588	26.1389	166.116	70.9034	0.0414516	0.426831
LOC_Os07g06830	AP13ITG72322RC_s_at	AP13ISTG72322-RC	601.415	31.9629	175.638	81.7307	0.0531462	0.465335
LOC_Os07g06550	AlamoCTG08015_at	AlamCTG08015	334.318	124.076	338.985	308.286	0.371131	0.909438
LOC_Os07g06440	AP13CTG07229_at	AP13CTG07229	253.455	111.398	408.928	350.939	0.439517	0.858194
LOC_Os07g05830	AP13ITG64875_at	AP13ISTG64875	243.045	91.4043	126.484	91.2465	0.37608	0.72141
LOC_Os07g05820	AP13ITG53843_at	AP13ISTG53843	133.964	63.5394	240.801	102.626	0.474302	0.426184
LOC_Os07g05620	KanlowCTG16758_s_at	KanlCTG16758	986.947	345.704	173.421	335.763	0.350276	1.93611
LOC_Os07g05620	AP13ITG46213_s_at	AP13ISTG46213	8222.86	3375.45	1530.87	2612.56	0.410496	1.70658
LOC_Os07g05380	AP13ITG39601_s_at	AP13ISTG39601	132.075	65.2599	94.4983	110.026	0.494112	1.16431
LOC_Os07g05000	KanlowCTG41277RC_s_at	KanlCTG41277-RC	24.2513	11.9834	31.1369	17.3894	0.494135	0.558483
LOC_Os07g04810	AP13CTG58904_at	AP13CTG58904	1222.04	582.138	264.239	385.38	0.476365	1.45845
LOC_Os07g03730	AP13ITG73317_at	AP13ISTG73317	35.7953	12.3769	25.9342	22.674	0.345769	0.874292
LOC_Os07g03710	AP13CTG58860_at	AP13CTG58860	174.319	48.8844	111.823	113.906	0.28043	1.01862
LOC_Os07g03250	KanlowCTG36499_at	KanlCTG36499	138.921	51.3473	267.185	329.858	0.369614	1.23457
LOC_Os07g03170	KanlowCTG34825_at	KanlCTG34825	240.541	95.0186	179.046	144.063	0.395021	0.804612
LOC_Os07g03130	AP13ITG71827_at	AP13ISTG71827	280.247	133.551	221.454	216.392	0.476548	0.977139
LOC_Os07g03110	AP13ITG67556_at	AP13ISTG67556	1020.76	166.004	630.725	486.136	0.162629	0.770758
LOC_Os07g03000	KanlowCTG42965_s_at	KanlCTG42965	36.4054	7.70117	12.0837	6.86622	0.211539	0.568224
LOC_Os07g02970	AP13CTG11849_at	AP13CTG11849	77.4512	31.1369	98.0203	43.9412	0.40202	0.448287
LOC_Os07g02810	AP13ITG73667_at	AP13ISTG73667	153.336	56.9734	837.532	163.931	0.371559	0.195732
LOC_Os07g02490	AP13ITG70874_at	AP13ISTG70874	118.199	32.4748	22.0916	20.9039	0.274746	0.946239
LOC_Os07g02480	AP13ITG75211_at	AP13ISTG75211	24.5583	10.8159	10.1085	7.7648	0.440416	0.768143
LOC_Os07g02480	AP13ITG49341_s_at	AP13ISTG49341	122.785	19.3261	25.9845	9.44998	0.157397	0.363678
LOC_Os07g02340	KanlowCTG30368RC_s_at	KanlCTG30368-RC	159.51	64.616	133.435	132.066	0.405091	0.989743
LOC_Os06g51310	AP13ITG49574_s_at	AP13ISTG49574	519.16	40.5198	270.701	89.3687	0.0780488	0.330138
LOC_Os06g51270	AP13ITG38218_at	AP13ISTG38218	222.102	105.929	3011.04	2556.64	0.476937	0.849088
LOC_Os06g50940	KanlowSLT49257_s_at	KanlSGLT49257	261.404	129.94	93.0632	45.8877	0.497083	0.493081
LOC_Os06g50930	AP13ITG38459_s_at	AP13ISTG38459	448.833	192.838	433.627	430.58	0.429644	0.992973
LOC_Os06g50930	AP13ITG38461_at	AP13ISTG38461	18.507	9.00241	10.6458	10.9774	0.486433	1.03114
LOC_Os06g49880	AP13CTG21884_s_at	AP13CTG21884	311.915	140.342	407.403	414.995	0.449938	1.01863
LOC_Os06g49520	AP13ITG67492_at	AP13ISTG67492	305.03	147.552	146.779	153.336	0.48373	1.04467
LOC_Os06g49160	AP13ITG41768_s_at	AP13ISTG41768	178.682	25.0238	1403.69	617.388	0.140047	0.439832
LOC_Os06g49150	AP13CTG18438_at	AP13CTG18438	126.134	53.8662	84.4202	97.7651	0.427054	1.15808
LOC_Os06g49040	KanlowCTG24414_at	KanlCTG24414	807.022	305.584	133.473	62.0711	0.378656	0.465045
LOC_Os06g48180	AP13ITG69856_at	AP13ISTG69856	632.842	273.558	59.6366	91.5001	0.432269	1.5343
LOC_Os06g48160	AP13CTG28985_s_at	AP13CTG28985	399.019	189.727	4837.81	3180.59	0.475485	0.657444
LOC_Os06g47620	AP13ITG40393_at	AP13ISTG40393	807.952	306.672	151.167	84.2175	0.379568	0.557115
LOC_Os06g47600	AP13CTG24019RC_s_at	AP13CTG24019-RC	682.751	194.686	5442.3	5148.85	0.28515	0.94608
LOC_Os06g47600	KanlowCTG43432_s_at	KanlCTG43432	488.044	155.957	3263.53	2740.14	0.319556	0.839625
LOC_Os06g47600	KanlowCTG05082RC_at	KanlCTG05082-RC	1404.51	315.544	7195.13	7064.95	0.224665	0.981907
LOC_Os06g47600	AP13ITG61617RC_at	AP13ISTG61617-RC	630.891	155.719	5914.48	4514.38	0.246825	0.763276
LOC_Os06g47250	OTHSWCTG18289_at	OthsCTG18289	234.301	47.29	162.627	100.109	0.201835	0.615572
LOC_Os06g47220	KanlowCTG02346_at	KanlCTG02346	696.251	134.829	537.507	81.9033	0.19365	0.152376
LOC_Os06g46770	AP13ITG40244_s_at	AP13ISTG40244	985.845	468.062	1230.66	621.683	0.474782	0.505162
LOC_Os06g46770	KanlowCTG00297_at	KanlCTG00297	1399.67	534.063	673.244	768.394	0.381565	1.14133
LOC_Os06g46770	AP13CTG23012_at	AP13CTG23012	330.874	19.144	181.675	71.7895	0.0578588	0.395154
LOC_Os06g46770	VS16ITG02650_s_at	VS16ISTG02650	1467.47	461.858	639.677	457.889	0.31473	0.715813
LOC_Os06g46770	KanlowCTG41729_x_at	KanlCTG41729	12435.8	1146.72	9058.2	6891.27	0.0922112	0.760777
LOC_Os06g46500	KanlowCTG46445_s_at	KanlCTG46445	32.6942	14.2812	816.215	981.482	0.436813	1.20248
LOC_Os06g46310	AP13CTG13722_at	AP13CTG13722	79.1133	8.59088	10.8205	11.7152	0.108589	1.08268
LOC_Os06g46270	AP13ITG61387_at	AP13ISTG61387	267.838	105.131	42.5547	54.998	0.392518	1.29241
LOC_Os06g45890	KanlowSLT50774_s_at	KanlSGLT50774	48.05	23.3557	106.988	90.8506	0.486071	0.849165
LOC_Os06g45890	AP13ITG42385_s_at	AP13ISTG42385	94.0545	46.4235	213.454	193.135	0.493581	0.904805
LOC_Os06g45730	KanlowCTG42973_s_at	KanlCTG42973	90.0697	37.6884	108.997	62.7205	0.418436	0.575436
LOC_Os06g45340	AP13ITG57195_at	AP13ISTG57195	170.835	27.9566	744.72	190.133	0.163647	0.255308
LOC_Os06g45090	AlamoSLT16873_at	AlamSGLT16873	25.1163	12.4393	27.4741	25.4578	0.495266	0.92661
LOC_Os06g45050	KanlowCTG42529_s_at	KanlCTG42529	1557.49	188.725	1770.57	655.159	0.121172	0.370027
LOC_Os06g45020	AlamoCTG13036_s_at	AlamCTG13036	57.4836	23.4792	174.857	225.495	0.40845	1.28959
LOC_Os06g45020	KanlowCTG12342_s_at	KanlCTG12342	420.283	204.375	661.701	828.914	0.486281	1.2527
LOC_Os06g45020	OTHSWCTG37271_at	OthsCTG37271	90.9316	17.2468	48.8825	25.8876	0.189668	0.529588
LOC_Os06g44890	KanlowCTG14812_s_at	KanlCTG14812	441.114	112.594	285.421	71.0278	0.255249	0.248853
LOC_Os06g44890	AP13CTG26002_s_at	AP13CTG26002	359.676	159.28	212.433	111.099	0.442844	0.522983
LOC_Os06g44800	KanlowCTG27610RC_at	KanlCTG27610-RC	23.9375	10.4993	11.2387	11.9175	0.438612	1.06039
LOC_Os06g44800	AP13.12692.m00004_at	AP13_model_12692.m00004	21.2636	8.23756	10.323	8.96938	0.387402	0.868878
LOC_Os06g44450	VS16ITG06652_at	VS16ISTG06652	418.927	28.9403	357.132	157.118	0.069082	0.439943
LOC_Os06g43850	OTHSWCTG12279_s_at	OthsCTG12279	103.116	17.0242	243.068	262.139	0.165098	1.07846
LOC_Os06g43600	KanlowCTG33915_s_at	KanlCTG33915	1229.17	558.907	10888.8	12637.5	0.454704	1.1606
LOC_Os06g43384	KanlowCTG05789_s_at	KanlCTG05789	221.343	71.3108	1287.21	1964.76	0.322173	1.52637
LOC_Os06g43384	KanlowCTG16800_s_at	KanlCTG16800	256.744	24.3197	99.58	192.787	0.0947235	1.936
LOC_Os06g43384	KanlowCTG09557_at	KanlCTG09557	79.4099	8.43301	453.973	747.023	0.106196	1.64552
LOC_Os06g43384	AP13ITG71440_at	AP13ISTG71440	615.33	71.9103	3226.38	4640.74	0.116865	1.43837
LOC_Os06g43350	KanlowCTG39710RC_s_at	KanlCTG39710-RC	666.092	175.697	120.163	115.767	0.263773	0.963411
LOC_Os06g43170	AP13CTG14937_at	AP13CTG14937	111.099	53.9739	861.264	962.441	0.485818	1.11747
LOC_Os06g43044	AP13ITG67128_s_at	AP13ISTG67128	135.091	58.3172	1323.5	1089.92	0.431689	0.823512
LOC_Os06g42620	KanlowCTG35268_at	KanlCTG35268	476.406	237.349	580.538	550.815	0.498207	0.948801
LOC_Os06g41810	AP13CTG11288_at	AP13CTG11288	176.119	39.5112	137.306	78.8614	0.224343	0.574349
LOC_Os06g41640	AlamoCTG10916_at	AlamCTG10916	65.166	28.8573	40.2283	31.6844	0.442828	0.787615
LOC_Os06g40720	AP13CTG13000_at	AP13CTG13000	44.0929	21.8031	24.4295	12.4046	0.494482	0.507771
LOC_Os06g40460	KanlowCTG42085_at	KanlCTG42085	287.359	134.87	281.249	152.792	0.469343	0.543263
LOC_Os06g40190	AP13ITG69676_at	AP13ISTG69676	2741.13	1221.98	1006.7	804.36	0.445796	0.799003
LOC_Os06g40150	AP13ITG67834_at	AP13ISTG67834	112.596	22.8001	484.952	409.281	0.202495	0.843963
LOC_Os06g40150	AP13ITG67834_s_at	AP13ISTG67834	114.839	48.3949	446.589	410.631	0.421417	0.919481
LOC_Os06g40040	AP13ITG73761_s_at	AP13ISTG73761	1640.11	532.052	3501.65	3408.71	0.3244	0.973457
LOC_Os06g40040	AP13ITG73089_at	AP13ISTG73089	127.576	52.9643	699.48	275.033	0.415158	0.393197
LOC_Os06g39960	OTHSWCTG07314_at	OthsCTG07314	136.004	66.9981	166.588	192.338	0.492619	1.15458
LOC_Os06g39760	KanlowCTG45904_s_at	KanlCTG45904	1337.4	578.311	828.914	682.686	0.432414	0.823591
LOC_Os06g38930	OTHSWSLT23704_at	OthsSGLT23704	119.05	33.6681	126.695	224.848	0.282806	1.77472
LOC_Os06g38470	AP13ITG54549_at	AP13ISTG54549	73.7936	13.7757	88.86	42.912	0.186679	0.482917
LOC_Os06g38340	AP13CTG04635_at	AP13CTG04635	94.0725	34.3792	85.0543	48.5469	0.365454	0.570775
LOC_Os06g38294	AP13ITG58698RC_at	AP13ISTG58698-RC	132.543	61.3442	22.3542	20.5664	0.462826	0.920023
LOC_Os06g37810	AP13CTG26312_at	AP13CTG26312	98.3879	49.1906	18.1301	11.0819	0.499967	0.611247
LOC_Os06g37760	AP13CTG08936_s_at	AP13CTG08936	361.569	60.6655	233.245	105.106	0.167784	0.450625
LOC_Os06g37330	AP13ITG63167_at	AP13ISTG63167	43.1125	14.0341	340.176	702.351	0.325523	2.06467
LOC_Os06g37010	KanlowCTG20232_at	KanlCTG20232	69.0504	31.0264	83.0102	64.0984	0.44933	0.772175
LOC_Os06g36700	AP13CTG15507_at	AP13CTG15507	63.4236	27.7894	79.1243	99.0437	0.438156	1.25175
LOC_Os06g36590	AP13CTG13624_at	AP13CTG13624	61.6822	29.1808	16.7195	16.1175	0.473083	0.963991
LOC_Os06g36560	KanlowCTG46245_s_at	KanlCTG46245	786.88	227.812	276.448	206.58	0.289513	0.747263
LOC_Os06g36520	AP13ITG69380_at	AP13ISTG69380	55.5495	22.8208	496.637	455.131	0.410818	0.916426
LOC_Os06g35970	AP13ITG52458_s_at	AP13ISTG52458	302.516	71.1344	2917.09	2752.38	0.235143	0.943538
LOC_Os06g35970	KanlowCTG05197_at	KanlCTG05197	535.856	157.723	3445.06	1826.94	0.294338	0.530309
LOC_Os06g34570	AP13ITG39344_s_at	AP13ISTG39344	604.799	90.1956	586.384	244.735	0.149133	0.417363
LOC_Os06g34450	AP13ITG64786_at	AP13ISTG64786	1885.08	755.987	572.065	467.278	0.401037	0.816828
LOC_Os06g33880	AP13ITG59551_at	AP13ISTG59551	435.104	210.92	1177.28	1403.69	0.484758	1.19231
LOC_Os06g33200	AP13ITG57485_at	AP13ISTG57485	347.366	153.81	3529.08	945.685	0.442791	0.267969
LOC_Os06g29520	AP13ITG75336_at	AP13ISTG75336	193.454	24.9339	198.207	84.0284	0.128888	0.423942
LOC_Os06g25010	AP13CTG59121_at	AP13CTG59121	8196.92	2592.33	1858.6	2694.31	0.316257	1.44965
LOC_Os06g24404	AP13CTG29768_at	AP13CTG29768	75.5908	22.5583	611.285	568.318	0.298427	0.92971
LOC_Os06g24404	AP13CTG29768_s_at	AP13CTG29768	160.898	30.9367	1342.36	1185.47	0.192276	0.883127
LOC_Os06g22960	KanlowCTG00319_at	KanlCTG00319	155.957	53.4454	2767.16	2808.73	0.342692	1.01502
LOC_Os06g22960	KanlowCTG12402_s_at	KanlCTG12402	163.148	72.2646	498.765	598.446	0.44294	1.19986
LOC_Os06g22330	AP13CTG02924_at	AP13CTG02924	128.507	47.5972	416.123	302.399	0.370387	0.726707
LOC_Os06g22330	AP13CTG02924_s_at	AP13CTG02924	66.8204	24.0892	305.804	258.677	0.360506	0.845892
LOC_Os06g22030	AP13ITG36270_s_at	AP13ISTG36270	1585.32	757.438	1368.26	701.946	0.477784	0.513021
LOC_Os06g21980	KanlowCTG43536_at	KanlCTG43536	1337.21	650.321	1132.82	543.623	0.486327	0.479885
LOC_Os06g19590	AP13ITG40117_s_at	AP13ISTG40117	180.524	89.919	198.107	117.522	0.4981	0.593222
LOC_Os06g19010	KanlowCTG20164_s_at	KanlCTG20164	493.349	236.134	27.0364	18.6398	0.478635	0.689433
LOC_Os06g18990	KanlowCTG20770_s_at	KanlCTG20770	2077.84	1001.62	56.189	38.0693	0.482052	0.677521
LOC_Os06g18900	AP13CTG46161_s_at	AP13CTG46161	221.522	47.8639	115.371	128.903	0.216068	1.11729
LOC_Os06g16960	AP13ITG62130_at	AP13ISTG62130	5204.07	1082.41	724.095	220.939	0.207993	0.305124
LOC_Os06g15990	KanlowCTG39117_at	KanlCTG39117	57.0838	25.6958	29.6976	1082.41	0.450143	36.4478
LOC_Os06g15690	AP13CTG08224_at	AP13CTG08224	544.971	252.627	227.608	193.37	0.463561	0.849572
LOC_Os06g15620	KanlowCTG02930_s_at	KanlCTG02930	837.532	292.099	4595.63	4420.94	0.348761	0.961988
LOC_Os06g15620	AP13ITG75959_s_at	AP13ISTG75959	1117.49	227.357	3444.39	3717.29	0.203453	1.07923
LOC_Os06g15570	AlamoCTG09513_at	AlamCTG09513	68.1459	32.9295	58.6886	46.2335	0.48322	0.787776
LOC_Os06g15370	KanlowCTG08316_at	KanlCTG08316	54.8137	25.7914	135.328	216.392	0.470528	1.59902
LOC_Os06g15170	AP13CTG23981_at	AP13CTG23981	149.089	51.6449	179.2	57.8478	0.346402	0.322812
LOC_Os06g14810	AP13ITG40825_s_at	AP13ISTG40825	86.9014	38.5168	586.13	295.104	0.443225	0.503478
LOC_Os06g14620	AP13CTG28967_at	AP13CTG28967	467.927	176.733	1474.54	761.556	0.377693	0.51647
LOC_Os06g13670	AP13CTG19535_at	AP13CTG19535	45.1248	20.8644	166.71	133.487	0.46237	0.800712
LOC_Os06g13570	AP13CTG13723_s_at	AP13CTG13723	2357.11	1140.21	1293.4	784.539	0.48373	0.606573
LOC_Os06g13390	AP13CTG19731_s_at	AP13CTG19731	170.088	62.5745	472.843	302.608	0.367894	0.639976
LOC_Os06g13350	KanlowCTG26347_at	KanlCTG26347	808.766	353.618	38.3202	45.8161	0.437232	1.19561
LOC_Os06g13310	AP13CTG21806_s_at	AP13CTG21806	979.176	348.75	2226.97	1716.46	0.356166	0.770758
LOC_Os06g13310	AP13ITG45489_s_at	AP13ISTG45489	69.5928	29.2214	186.65	138.702	0.419891	0.743116
LOC_Os06g13010	AP13CTG23049_at	AP13CTG23049	236.455	74.8238	179.389	133.551	0.316439	0.744477
LOC_Os06g13000	AlamoSLT16858_at	AlamSGLT16858	152.233	44.9637	69.5928	37.5307	0.295361	0.53929
LOC_Os06g12970	KanlowCTG31004_s_at	KanlCTG31004	278.211	111.046	157.621	89.5869	0.399142	0.568371
LOC_Os06g12970	KanlowCTG31004_at	KanlCTG31004	52.5985	22.8805	79.7901	36.0572	0.435004	0.451901
LOC_Os06g12790	AP13CTG02708_s_at	AP13CTG02708	36.6461	15.5023	90.8375	61.9175	0.423029	0.681629
LOC_Os06g12690	AP13CTG03889_at	AP13CTG03889	2947.8	794.658	1260.81	757.669	0.269576	0.600937
LOC_Os06g11370	AP13CTG09701_s_at	AP13CTG09701	159.931	25.8125	173.129	73.5779	0.161398	0.424989
LOC_Os06g11290	KanlowCTG23007_at	KanlCTG23007	234.143	81.3019	2837.32	5044.71	0.347231	1.77798
LOC_Os06g11190	OTHSWCTG22752_s_at	OthsCTG22752	104.721	33.3891	602.754	288.043	0.318839	0.477878
LOC_Os06g11030	AP13ITG60447_at	AP13ISTG60447	92.7313	44.9466	13.0663	13.9452	0.484697	1.06726
LOC_Os06g10420	AP13ITG45447_s_at	AP13ISTG45447	140.499	61.1461	59.3073	46.0272	0.435207	0.776079
LOC_Os06g10420	AP13ITG45446_s_at	AP13ISTG45446	166.636	69.5307	63.4236	43.3769	0.417262	0.683923
LOC_Os06g09840	AP13CTG04583_s_at	AP13CTG04583	89.0071	44.3446	102.32	56.1187	0.498214	0.548461
LOC_Os06g09840	AP13CTG04583_at	AP13CTG04583	278.231	91.5792	267.102	131.07	0.329148	0.49071
LOC_Os06g09840	KanlowCTG21464_s_at	KanlCTG21464	133.464	46.4667	121.604	67.7077	0.348158	0.556788
LOC_Os06g09630	KanlowCTG42138_at	KanlCTG42138	236.455	117.171	156.498	155.551	0.495532	0.993951
LOC_Os06g09630	AP13CTG18705_s_at	AP13CTG18705	427.729	211.605	429.629	431.377	0.494717	1.00407
LOC_Os06g08860	AP13CTG29185_s_at	AP13CTG29185	15.1373	5.67331	8.22807	7.35903	0.37479	0.894381
LOC_Os06g08320	AP13ITG63296_at	AP13ISTG63296	1598.18	77.7081	1521.94	109.161	0.0486228	0.0717247
LOC_Os06g08120	AP13ITG63009_s_at	AP13ISTG63009	214.742	104.435	113.246	98.7068	0.486327	0.871618
LOC_Os06g06760	KanlowSLT56600_at	KanlSGLT56600	568.222	107.549	539.324	418.806	0.189273	0.776539
LOC_Os06g06420	AP13ITG75507_at	AP13ISTG75507	834.88	373.511	936.573	494.75	0.447384	0.528255
LOC_Os06g05630	KanlowCTG37283_s_at	KanlCTG37283	194.18	65.6193	172.549	81.0259	0.337931	0.469581
LOC_Os06g05590	KanlowCTG36630_at	KanlCTG36630	187.516	62.9855	144.821	46.2957	0.335895	0.319675
LOC_Os06g05550	AP13ITG60686_s_at	AP13ISTG60686	44.0798	20.4603	742.861	815.588	0.464165	1.0979
LOC_Os06g05550	AP13ITG60928_at	AP13ISTG60928	46.5987	15.9357	1059.8	972.272	0.341977	0.91741
LOC_Os06g05180	KanlowCTG14423_s_at	KanlCTG14423	136.363	38.08	13.1233	10.2053	0.279255	0.777649
LOC_Os06g05180	KanlowCTG13436_s_at	KanlCTG13436	1663.53	798.804	1445.09	1007.77	0.480185	0.697372
LOC_Os06g04980	AP13CTG26094_s_at	AP13CTG26094	158.18	43.1208	107.268	50.9743	0.272606	0.475204
LOC_Os06g04780	AP13ITG70830_at	AP13ISTG70830	487.002	231.834	170.712	75.6725	0.476043	0.443275
LOC_Os06g04070	KanlowCTG03811RC_s_at	KanlCTG03811-RC	556.422	243.103	2360.72	2967.88	0.436904	1.25719
LOC_Os06g04030	VS16ITG00900_at	VS16ISTG00900	1634.92	335.469	2195.47	765.528	0.205189	0.348686
LOC_Os06g03860	AP13CTG21881_s_at	AP13CTG21881	1563.83	663.975	352.137	265.028	0.424583	0.752627
LOC_Os06g03660	AP13CTG15950_at	AP13CTG15950	3362.75	1469.25	2576.59	1448.71	0.43692	0.562259
LOC_Os06g03600	AlamoCTG13467_s_at	AlamCTG13467	583.313	284.05	190.771	184.273	0.48696	0.965936
LOC_Os06g02800	AP13CTG15732_s_at	AP13CTG15732	645.86	291.53	170.671	127.265	0.451383	0.745675
LOC_Os06g02710	AP13CTG32587_at	AP13CTG32587	442.686	215.352	326.923	256.927	0.486468	0.785896
LOC_Os06g02160	AP13CTG29361_at	AP13CTG29361	166.164	67.4479	99.58	55.5388	0.405912	0.557731
LOC_Os06g02100	KanlowCTG22674_s_at	KanlCTG22674	77.2417	19.2002	70.3193	34.4326	0.248574	0.48966
LOC_Os06g02100	AP13CTG63173_at	AP13CTG63173	373.781	27.5276	284.22	120.799	0.0736463	0.425018
LOC_Os06g01990	AP13ITG76116_at	AP13ISTG76116	404.657	161.62	212.632	158.18	0.399401	0.743914
LOC_Os06g01990	AP13ITG70657_at	AP13ISTG70657	588.36	229.126	267.799	301.304	0.389433	1.12511
LOC_Os06g01490	AP13CTG08956_s_at	AP13CTG08956	329.747	110.11	3236.71	2693.41	0.333923	0.832144
LOC_Os06g01440	AP13ITG72467_at	AP13ISTG72467	286.087	129.141	243.033	188.76	0.451405	0.776684
LOC_Os06g01440	AP13ITG72467_s_at	AP13ISTG72467	552.618	212.326	160.932	131.207	0.384219	0.815293
LOC_Os06g01440	AlamoCTG13574_s_at	AlamCTG13574	541.245	214.034	106.86	104.661	0.395448	0.97942
LOC_Os05g51130	AP13CTG07265RC_at	AP13CTG07265-RC	168.998	73.7305	15.2224	14.5329	0.436279	0.954702
LOC_Os05g51130	AP13ITG49094_s_at	AP13ISTG49094	393.591	130.314	9.72009	12.8199	0.33109	1.31891
LOC_Os05g51130	AP13CTG05811RC_at	AP13CTG05811-RC	1056.45	209.886	19.1532	18.5901	0.198671	0.970599
LOC_Os05g50970	AP13CTG30892_at	AP13CTG30892	304.188	147.935	322.174	325.317	0.486327	1.00975
LOC_Os05g50500	KanlowCTG03487_s_at	KanlCTG03487	300.361	118.675	71.7539	59.5107	0.395106	0.829373
LOC_Os05g49060	KanlowCTG34521_at	KanlCTG34521	517.429	118.211	579.867	108.997	0.228458	0.187968
LOC_Os05g48870	KanlowCTG32752_s_at	KanlCTG32752	120.996	48.3424	100.094	55.5308	0.399536	0.554785
LOC_Os05g48730	AP13ITG65205_at	AP13ISTG65205	144.503	42.6907	44.1916	43.5686	0.295432	0.985901
LOC_Os05g48410	AP13CTG56046_at	AP13CTG56046	125.474	44.7263	124.742	96.4839	0.356458	0.773467
LOC_Os05g48330	AP13CTG58858_at	AP13CTG58858	371.199	101.831	155.421	93.1888	0.27433	0.59959
LOC_Os05g48310	AP13CTG36074_s_at	AP13CTG36074	376.109	187.443	826.021	690.38	0.498375	0.83579
LOC_Os05g48260	AP13CTG09673_at	AP13CTG09673	50.3341	9.28613	10.6849	8.56716	0.18449	0.8018
LOC_Os05g48260	KanlowCTG23579_s_at	KanlCTG23579	464.828	210.844	183.044	186.89	0.453596	1.02101
LOC_Os05g48230	AP13CTG10569RC_s_at	AP13CTG10569-RC	520.978	223.668	498.047	541.206	0.429324	1.08666
LOC_Os05g48150	AP13CTG05026_s_at	AP13CTG05026	176.809	70.8565	1846.47	1878.04	0.400752	1.01709
LOC_Os05g47830	KanlowCTG30474_at	KanlCTG30474	258.982	52.1219	119.965	66.0313	0.201257	0.550424
LOC_Os05g47690	AP13CTG26821_s_at	AP13CTG26821	25.6737	12.0151	40.3643	45.8161	0.467995	1.13507
LOC_Os05g46720	OTHSWCTG23427_s_at	OthsCTG23427	37.7088	9.25967	14.5648	8.23756	0.245557	0.56558
LOC_Os05g46460	AP13CTG13482_s_at	AP13CTG13482	652.967	288.264	261.379	160.419	0.441468	0.613741
LOC_Os05g45830	KanlowCTG41889_s_at	KanlCTG41889	44.266	21.3345	26.4542	24.3533	0.481963	0.920585
LOC_Os05g45660	AP13CTG11447_s_at	AP13CTG11447	946.743	346.141	960.595	449.092	0.365613	0.467514
LOC_Os05g45410	AP13CTG37019_s_at	AP13CTG37019	186.108	49.8713	144.529	89.2829	0.267969	0.61775
LOC_Os05g45070	AP13ITG61284_at	AP13ISTG61284	173.129	77.0086	114.667	122.368	0.444806	1.06716
LOC_Os05g45040	AlamoCTG08569_x_at	AlamCTG08569	294.846	98.0597	185.466	85.1094	0.332579	0.458896
LOC_Os05g44916	AP13CTG11472_s_at	AP13CTG11472	710.267	280.381	849.244	590.179	0.394755	0.694947
LOC_Os05g44810	AP13CTG16560_s_at	AP13CTG16560	311.96	107.658	111.818	66.7242	0.345102	0.596722
LOC_Os05g44810	AP13CTG18243_at	AP13CTG18243	481.14	189.39	223.7	132.981	0.393628	0.594461
LOC_Os05g44810	AlamoCTG14714_s_at	AlamCTG14714	289.1	124.503	137.664	185.475	0.430657	1.3473
LOC_Os05g44786	AP13ITG41578_at	AP13ISTG41578	397.574	20.7094	174.999	52.0291	0.0520896	0.297312
LOC_Os05g44770	KanlowCTG22189_s_at	KanlCTG22189	903.147	79.1645	453.843	240.541	0.0876541	0.53001
LOC_Os05g44770	AP13CTG17394_at	AP13CTG17394	1444.61	34.6554	524.954	270.375	0.0239895	0.515045
LOC_Os05g44200	KanlowCTG13482_at	KanlCTG13482	129.401	35.0856	590.207	689.582	0.271139	1.16837
LOC_Os05g44130	AP13ITG52971_s_at	AP13ISTG52971	510.937	192.061	228.346	161.087	0.3759	0.705452
LOC_Os05g44130	KanlowCTG41987_s_at	KanlCTG41987	61.7693	29.171	40.7525	29.1411	0.472258	0.715075
LOC_Os05g44130	AlamoSLT16572_at	AlamSGLT16572	19.6544	8.16829	12.5029	10.4358	0.415596	0.834667
LOC_Os05g44130	KanlowCTG38394_at	KanlCTG38394	52.995	24.3157	33.8644	22.1158	0.458831	0.653068
LOC_Os05g44070	AP13CTG06185_at	AP13CTG06185	25.5156	11.5922	79.3942	62.9039	0.454316	0.792299
LOC_Os05g44050	AP13CTG15354_s_at	AP13CTG15354	1341.88	653.605	894.974	861.595	0.487083	0.962704
LOC_Os05g43930	KanlowSLT49902_s_at	KanlSGLT49902	128.012	18.8315	13.7638	13.1089	0.147107	0.95242
LOC_Os05g43790	AP13CTG25162_at	AP13CTG25162	237.298	14.5855	162.58	14.7916	0.061465	0.0909805
LOC_Os05g43760	KanlowCTG08716_s_at	KanlCTG08716	56.1688	27.0386	65.1285	43.5644	0.481381	0.6689
LOC_Os05g42270	KanlowCTG18540_at	KanlCTG18540	144.389	57.7299	79.3584	34.0156	0.399822	0.428633
LOC_Os05g42250	AP13CTG27509_at	AP13CTG27509	131.239	50.5639	123.643	99.7355	0.385282	0.806642
LOC_Os05g42100	AP13ITG61309_s_at	AP13ISTG61309	68.4372	27.1017	170.137	108.554	0.396008	0.638041
LOC_Os05g42060	KanlowCTG23954_s_at	KanlCTG23954	200.157	85.4959	8630.43	7858.48	0.427145	0.910555
LOC_Os05g42020	KanlowCTG45093_s_at	KanlCTG45093	43.7805	19.9623	885.478	786.88	0.455962	0.888651
LOC_Os05g40890	AP13ITG39078_at	AP13ISTG39078	120.844	40.126	26.3707	22.0108	0.332047	0.834667
LOC_Os05g40890	AP13ITG39079_s_at	AP13ISTG39079	1428.53	657.509	243.068	198.806	0.460271	0.817902
LOC_Os05g40890	AP13ITG59438_at	AP13ISTG59438	932.666	403.123	396.329	414.437	0.432227	1.04569
LOC_Os05g40010	AP13ITG64156RC_at	AP13ISTG64156-RC	60.8021	18.8538	35.5369	61.3944	0.310085	1.72762
LOC_Os05g40010	KanlowCTG17940_s_at	KanlCTG17940	726.596	254.531	128.893	68.1694	0.350306	0.528882
LOC_Os05g39990	AP13ITG71663_s_at	AP13ISTG71663	105.131	29.2194	1704.44	1274.24	0.277932	0.747604
LOC_Os05g39990	AP13ITG55345_at	AP13ISTG55345	420.242	120.331	3169.49	2478.08	0.286337	0.781856
LOC_Os05g39680	AP13CTG16935_at	AP13CTG16935	40.2244	16.2105	50.3673	49.1161	0.403001	0.97516
LOC_Os05g39240	AP13ITG45092_s_at	AP13ISTG45092	471.419	227.741	335.533	451.162	0.483096	1.34461
LOC_Os05g38940	AP13ITG59572_s_at	AP13ISTG59572	620.283	180.32	44.942	43.2105	0.290706	0.961473
LOC_Os05g38940	AP13ITG68625_at	AP13ISTG68625	523.374	195.741	115.21	102.404	0.373999	0.888843
LOC_Os05g38940	AP13ITG63494_at	AP13ISTG63494	494.699	113.424	45.597	45.6791	0.22928	1.0018
LOC_Os05g38730	AP13CTG09592_at	AP13CTG09592	332.041	59.525	219.065	126.805	0.17927	0.578844
LOC_Os05g38170	AP13CTG71684_at	AP13CTG71684	174.714	71.6292	258.864	135.769	0.409979	0.52448
LOC_Os05g37330	KanlowCTG06989_at	KanlCTG06989	811.933	349.841	754.989	784.728	0.430874	1.03939
LOC_Os05g37250	AP13ITG70943RC_at	AP13ISTG70943-RC	1116.74	413.04	94.2307	60.1352	0.369862	0.63817
LOC_Os05g37150	AP13CTG35901_s_at	AP13CTG35901	301.435	98.3624	103.253	81.3136	0.326314	0.787521
LOC_Os05g37150	KanlowCTG09603_s_at	KanlCTG09603	1083.04	396.786	606.8	417.34	0.366364	0.687771
LOC_Os05g35730	KanlowCTG20016RC_x_at	KanlCTG20016-RC	50.7589	23.3003	52.7098	27.3832	0.459038	0.519508
LOC_Os05g35730	KanlowCTG47302_s_at	KanlCTG47302	2000.37	804.36	2098.61	1230.66	0.402106	0.586417
LOC_Os05g35530	OTHSWCTG12794_at	OthsCTG12794	62.1544	11.5963	48.6951	37.3025	0.186572	0.766042
LOC_Os05g35530	AP13ITG74682_at	AP13ISTG74682	125.101	13.173	89.574	67.261	0.105299	0.750898
LOC_Os05g35480	KanlowCTG43577_s_at	KanlCTG43577	82.7794	23.2279	4182.47	2403.41	0.280599	0.574639
LOC_Os05g35274	AP13ITG39726_at	AP13ISTG39726	60.7758	28.7791	49.0172	37.4065	0.473529	0.76313
LOC_Os05g35070	AP13CTG45738_at	AP13CTG45738	29.8571	10.3852	268.753	190.024	0.347832	0.707056
LOC_Os05g34720	AP13CTG10119_s_at	AP13CTG10119	175.487	67.9529	140.083	158.347	0.387226	1.13038
LOC_Os05g34700	AP13CTG23779_at	AP13CTG23779	99.4029	36.5348	1197.18	1197.18	0.367543	1
LOC_Os05g34700	AP13CTG23780_at	AP13CTG23780	65.1848	25.03	1314.51	1612.42	0.383986	1.22663
LOC_Os05g34490	OTHSWCTG11225_at	OthsCTG11225	426.293	135.562	334.463	112.893	0.318001	0.337537
LOC_Os05g34490	OTHSWCTG11225_s_at	OthsCTG11225	541.518	171.271	411.133	125.892	0.31628	0.306208
LOC_Os05g34330	KanlowCTG30459_at	KanlCTG30459	136.897	63.5594	152.953	124.503	0.464286	0.813992
LOC_Os05g34180	KanlowCTG20133_s_at	KanlCTG20133	26.3228	9.22155	29.7951	49.0102	0.350325	1.64491
LOC_Os05g33810	AP13CTG07375_x_at	AP13CTG07375	465.197	194.78	249.902	191.635	0.418705	0.766842
LOC_Os05g33644	KanlowCTG19978_s_at	KanlCTG19978	374.696	104.852	446.126	427.606	0.279833	0.958487
LOC_Os05g33644	AP13CTG10658_s_at	AP13CTG10658	165.616	27.7627	179.786	94.4099	0.167633	0.525123
LOC_Os05g32630	AP13ITG37036_s_at	AP13ISTG37036	1570.44	678.263	855.13	342.715	0.431895	0.400776
LOC_Os05g32380	AP13ITG53048_at	AP13ISTG53048	412.128	115.404	273.623	200.689	0.280021	0.733449
LOC_Os05g32350	AP13CTG12874_at	AP13CTG12874	15.6358	7.60941	84.0875	78.8235	0.486665	0.937399
LOC_Os05g32350	AP13CTG12874_s_at	AP13CTG12874	97.3573	41.3712	648.316	540.257	0.424942	0.833323
LOC_Os05g32310	AP13CTG16359_at	AP13CTG16359	384.123	43.7529	129.376	92.8264	0.113903	0.717494
LOC_Os05g32230	AP13CTG11264_at	AP13CTG11264	543.154	263.83	872.843	639.529	0.485737	0.732697
LOC_Os05g32110	AP13ITG43381_at	AP13ISTG43381	207.228	102.36	1235.22	1859	0.493946	1.50499
LOC_Os05g32060	AP13CTG12562_s_at	AP13CTG12562	227.549	76.8615	202.294	174.425	0.33778	0.862234
LOC_Os05g31760	AP13ITG59361_at	AP13ISTG59361	711.984	258.4	803.491	436.643	0.36293	0.543433
LOC_Os05g31750	AP13ITG72655_s_at	AP13ISTG72655	966.716	369.646	1116.69	675.848	0.382373	0.605226
LOC_Os05g30750	AP13ITG62880_at	AP13ISTG62880	1176.38	64.6724	2361.06	2385.89	0.0549758	1.01052
LOC_Os05g30640	AP13CTG25948_at	AP13CTG25948	41.7934	20.7555	163.144	129.401	0.496623	0.79317
LOC_Os05g30300	AP13CTG31855_s_at	AP13CTG31855	65.1222	19.6191	146.611	54.7663	0.301266	0.373548
LOC_Os05g28740	AP13CTG31850_s_at	AP13CTG31850	4287.88	999.463	449.512	352.35	0.23309	0.78385
LOC_Os05g28740	KanlowCTG17528_s_at	KanlCTG17528	8286.02	4012.09	1428.25	1438.19	0.4842	1.00696
LOC_Os05g28180	AP13CTG07527_s_at	AP13CTG07527	320.871	111.398	85.6294	63.4236	0.347174	0.740676
LOC_Os05g28090	AP13ITG39106_s_at	AP13ISTG39106	90.6162	26.0825	216.897	104.754	0.287834	0.482968
LOC_Os05g25800	OTHSWCTG27067_at	OthsCTG27067	27.1721	11.4058	6.43177	7.29521	0.419762	1.13424
LOC_Os05g24970	AP13CTG12246_at	AP13CTG12246	441.178	120.826	278.211	292.148	0.27387	1.05009
LOC_Os05g24010	AP13CTG02208_at	AP13CTG02208	137.217	56.8873	144.89	197.603	0.41458	1.36381
LOC_Os05g23990	AP13ITG77099_s_at	AP13ISTG77099	22.3843	10.3753	22.7552	10.0916	0.463507	0.443484
LOC_Os05g23990	KanlowCTG45623_s_at	KanlCTG45623	100.427	36.7592	47.4005	50.3904	0.36603	1.06308
LOC_Os05g23990	AP13ITG67175_at	AP13ISTG67175	208.341	98.4451	245.784	133.448	0.472518	0.54295
LOC_Os05g23860	AP13ITG63112_at	AP13ISTG63112	20.6607	7.68729	33.9438	17.7003	0.372073	0.521458
LOC_Os05g19700	AP13CTG17802_at	AP13CTG17802	156.37	53.6011	114.698	52.5985	0.342784	0.458582
LOC_Os05g19630	AP13CTG12204_at	AP13CTG12204	109.455	38.3939	92.7329	61.3988	0.350775	0.662104
LOC_Os05g19470	KanlowCTG45073_s_at	KanlCTG45073	2180.3	685.167	1300.64	782.121	0.314253	0.601334
LOC_Os05g19370	KanlowCTG08571_s_at	KanlCTG08571	64.7938	28.6646	4173.23	3541.91	0.442398	0.848722
LOC_Os05g18960	KanlowCTG24124_s_at	KanlCTG24124	158.477	24.0042	58.6976	12.6442	0.151469	0.215413
LOC_Os05g18774	AP13ITG39296_s_at	AP13ISTG39296	496.422	235.206	273.899	224.433	0.473803	0.819398
LOC_Os05g18750	KanlowCTG42440_s_at	KanlCTG42440	113.379	14.273	34.9719	20.826	0.125888	0.595505
LOC_Os05g18470	AP13CTG09388_s_at	AP13CTG09388	213.788	60.3386	299.785	352.147	0.282236	1.17467
LOC_Os05g18470	AlamoCTG00116_at	AlamCTG00116	101.096	6.48678	51.8071	7.52299	0.0641647	0.145212
LOC_Os05g18470	OTHSWCTG10407_at	OthsCTG10407	84.4481	31.2483	22.7897	23.3512	0.370029	1.02464
LOC_Os05g16200	AP13CTG15678_at	AP13CTG15678	36.5883	14.3483	11.7848	10.2004	0.392155	0.865557
LOC_Os05g15510	AP13CTG30668_s_at	AP13CTG30668	1905.62	849.244	2640.26	2868.44	0.445651	1.08642
LOC_Os05g14440	AP13ITG65117_at	AP13ISTG65117	65.4453	30.6051	50.3953	41.679	0.467645	0.827041
LOC_Os05g14320	AP13CTG17349_at	AP13CTG17349	245.147	85.0686	287.406	131.915	0.347011	0.458984
LOC_Os05g14320	AlamoCTG14834_s_at	AlamCTG14834	230.742	90.0594	315.173	155.477	0.390303	0.493306
LOC_Os05g13780	AP13CTG15786_at	AP13CTG15786	182.921	75.6998	160.619	119.05	0.413838	0.741193
LOC_Os05g13330	AlamoCTG10490_at	AlamCTG10490	196.05	42.0142	88.3833	52.1649	0.214304	0.590213
LOC_Os05g12450	AP13ITG71841_at	AP13ISTG71841	50.2568	15.7929	94.5153	115.429	0.314243	1.22128
LOC_Os05g12000	KanlowCTG33324_at	KanlCTG33324	83.8833	26.1652	82.3367	44.5375	0.311924	0.540919
LOC_Os05g11910	VS16ITG00304_s_at	VS16ISTG00304	2006.29	797.941	1938.69	1845.94	0.39772	0.952158
LOC_Os05g11900	AP13CTG29927_s_at	AP13CTG29927	151.345	70.9202	78.9176	91.8084	0.4686	1.16335
LOC_Os05g11810	AP13ITG42644_at	AP13ISTG42644	64.7812	20.6184	52.7111	37.1445	0.318278	0.704682
LOC_Os05g10770	AP13ITG52447_s_at	AP13ISTG52447	366.529	120.127	227.934	161.006	0.327741	0.706369
LOC_Os05g10210	AP13ITG70120_at	AP13ISTG70120	259.498	83.5876	1951.19	778.746	0.322113	0.399113
LOC_Os05g09490	OTHSWCTG07756_at	OthsCTG07756	346.44	153.458	59.8971	68.2834	0.442956	1.14001
LOC_Os05g08720	KanlowCTG47571_at	KanlCTG47571	103.253	28.3443	109.266	64.895	0.274514	0.593919
LOC_Os05g08610	AP13CTG09271_s_at	AP13CTG09271	102.576	42.0142	34.2243	29.6273	0.40959	0.86568
LOC_Os05g07820	AP13ITG57973_at	AP13ISTG57973	262.326	96.345	1748.25	1801.53	0.367272	1.03048
LOC_Os05g06350	AP13CTG04740_at	AP13CTG04740	226.412	90.8506	170.174	114.607	0.401263	0.673471
LOC_Os05g06350	AP13ITG72938_at	AP13ISTG72938	141.532	61.3426	105.483	49.4008	0.433419	0.46833
LOC_Os05g06060	KanlowCTG43855_at	KanlCTG43855	402.63	74.8561	404.851	156.227	0.185918	0.385888
LOC_Os05g06050	KanlowCTG17460_s_at	KanlCTG17460	157.59	67.5321	108.594	67.6508	0.42853	0.622968
LOC_Os05g06050	AP13CTG24354_at	AP13CTG24354	139.686	69.3141	114.283	104.345	0.496212	0.913042
LOC_Os05g05840	AP13CTG28377_s_at	AP13CTG28377	85.0543	31.0845	62.4844	47.8352	0.365467	0.765554
LOC_Os05g05680	AP13ITG42532_at	AP13ISTG42532	218.532	41.4984	154.143	398.089	0.189897	2.5826
LOC_Os05g05270	OTHSWCTG13584_at	OthsCTG13584	107.263	50.7589	180.292	164.531	0.473219	0.912583
LOC_Os05g05240	OTHSWCTG08190_at	OthsCTG08190	57.7221	8.14106	39.7037	20.5672	0.141039	0.518018
LOC_Os05g05030	AP13CTG69253_at	AP13CTG69253	891.637	418.042	57.7687	48.4444	0.468848	0.838591
LOC_Os05g04700	AP13ITG64106_at	AP13ISTG64106	461.44	101.579	98.7068	73.6298	0.220136	0.745944
LOC_Os05g04640	AP13ITG73773_at	AP13ISTG73773	155.417	57.294	388.061	516.007	0.368647	1.32971
LOC_Os05g04520	AP13ITG48337_at	AP13ISTG48337	230.809	68.699	48.5134	51.2734	0.297645	1.05689
LOC_Os05g04390	AP13ITG36602_s_at	AP13ISTG36602	474.516	150.83	433.544	263.83	0.317862	0.608542
LOC_Os05g04170	AP13CTG14409_s_at	AP13CTG14409	208.69	38.618	2187.73	1971.97	0.18505	0.90138
LOC_Os05g04070	KanlowSLT50426_at	KanlSGLT50426	53.0609	21.1126	35.3025	20.6776	0.397894	0.585728
LOC_Os05g03830	AP13CTG17658_at	AP13CTG17658	49.6943	21.0847	67.5937	66.9487	0.424288	0.990458
LOC_Os05g03610	KanlowSLT48005_s_at	KanlSGLT48005	477.573	231.25	198.093	153.818	0.484219	0.776492
LOC_Os05g03610	KanlowCTG25092_s_at	KanlCTG25092	946.821	420.283	315.241	228.401	0.443888	0.724528
LOC_Os05g03610	AP13ITG59231_at	AP13ISTG59231	123.302	45.9406	103.624	80.0303	0.372587	0.772313
LOC_Os05g02750	AP13CTG15817_at	AP13CTG15817	71.5493	29.5848	42.2496	36.1375	0.413488	0.855333
LOC_Os05g02750	AP13ITG68435_at	AP13ISTG68435	139.586	57.5515	18.5388	19.5209	0.412302	1.05298
LOC_Os05g02310	KanlowCTG47713_s_at	KanlCTG47713	63.1325	29.1626	74.2243	49.7015	0.461927	0.669612
LOC_Os05g02310	AP13CTG25169_at	AP13CTG25169	170.088	74.1152	184.185	60.7758	0.435746	0.329972
LOC_Os05g01950	AP13ITG39172_s_at	AP13ISTG39172	253.354	113.16	1214.13	929.389	0.446647	0.76548
LOC_Os05g01910	AP13CTG12434_s_at	AP13CTG12434	537.847	173.046	318.871	317.105	0.321738	0.994462
LOC_Os05g01810	AP13CTG11250_s_at	AP13CTG11250	51.9171	15.5669	554.886	452.657	0.299841	0.815765
LOC_Os05g01230	AP13CTG25889_at	AP13CTG25889	81.6598	18.984	40.9829	19.4346	0.232476	0.474213
LOC_Os04g59200	AP13ITG72053_at	AP13ISTG72053	939.063	84.7463	2637.72	3350.85	0.0902456	1.27036
LOC_Os04g59160	AP13ITG65367_at	AP13ISTG65367	293.065	57.0064	517.603	648.083	0.194518	1.25209
LOC_Os04g59160	KanlowCTG16117_s_at	KanlCTG16117	456.999	195.366	2078.39	5073.68	0.427497	2.44117
LOC_Os04g59040	AlamoCTG06367_at	AlamCTG06367	79.2763	37.344	59.2252	36.0345	0.471062	0.608432
LOC_Os04g58840	KanlowCTG07133_at	KanlCTG07133	305.804	103.998	3682.48	2702.42	0.34008	0.733857
LOC_Os04g58840	AP13ITG74160_at	AP13ISTG74160	76.8228	18.4679	1054.84	639.207	0.240396	0.605976
LOC_Os04g58790	AP13CTG22130_at	AP13CTG22130	55.2455	25.7793	214.629	153.078	0.466631	0.713222
LOC_Os04g58720	KanlowCTG43913_s_at	KanlCTG43913	34.4756	11.324	834.639	1014.78	0.328463	1.21583
LOC_Os04g58400	AP13CTG05729_at	AP13CTG05729	205.132	99.7714	238.352	139.774	0.486377	0.586417
LOC_Os04g58330	AP13CTG27492_s_at	AP13CTG27492	354.298	143.579	81.5797	66.4906	0.40525	0.815038
LOC_Os04g58200	AP13CTG58880_at	AP13CTG58880	448.454	165.485	3908.01	1930.93	0.369011	0.494095
LOC_Os04g58200	AP13ITG69850_s_at	AP13ISTG69850	296.141	138.145	1815.37	820.374	0.466483	0.451905
LOC_Os04g58140	KanlowCTG14215_at	KanlCTG14215	650.634	315.786	458.958	280.247	0.485352	0.610616
LOC_Os04g58120	AP13ITG60130_at	AP13ISTG60130	352.173	170.076	280.166	185.956	0.482933	0.663735
LOC_Os04g57640	AP13CTG29316_s_at	AP13CTG29316	151.7	46.6581	92.0908	88.0685	0.307568	0.956323
LOC_Os04g57550	KanlowCTG42295_s_at	KanlCTG42295	1299.78	420.946	392.737	526.869	0.323859	1.34153
LOC_Os04g57550	AP13CTG14244_s_at	AP13CTG14244	4561.26	1607.18	1031.52	1483.73	0.352353	1.43839
LOC_Os04g57550	AP13CTG16391_s_at	AP13CTG16391	1071.71	471.147	312.097	554.513	0.439621	1.77674
LOC_Os04g57440	AP13CTG08384_at	AP13CTG08384	1079.43	345.024	2557.56	3518.8	0.319637	1.37584
LOC_Os04g57390	AP13CTG06413_at	AP13CTG06413	420.788	142.587	315.786	249.986	0.338858	0.791629
LOC_Os04g57300	KanlowCTG43680_s_at	KanlCTG43680	2241.33	913.472	1278.41	561.14	0.407558	0.438935
LOC_Os04g57300	AP13CTG05653_s_at	AP13CTG05653	2069.52	989.143	817.58	459.869	0.477958	0.562475
LOC_Os04g56740	AP13CTG27364_at	AP13CTG27364	642.015	296.141	371.199	182.33	0.461267	0.491192
LOC_Os04g56680	KanlowCTG23381_s_at	KanlCTG23381	107.34	29.737	1379.87	1332.7	0.277035	0.96582
LOC_Os04g56180	AP13ITG64470_at	AP13ISTG64470	394.584	151.2	2532.71	1918.05	0.383188	0.757313
LOC_Os04g55560	AP13ITG36075_at	AP13ISTG36075	389.485	186.765	83.6811	63.1005	0.479517	0.754059
LOC_Os04g55420	AP13CTG11958_at	AP13CTG11958	72.275	28.865	21.7939	20.3344	0.399377	0.933033
LOC_Os04g54890	KanlowCTG25308_at	KanlCTG25308	158.869	38.3983	139.626	39.2185	0.241697	0.280882
LOC_Os04g54280	AP13CTG23501RC_at	AP13CTG23501-RC	762.829	190.092	1034.71	699.681	0.249193	0.676211
LOC_Os04g54200	AP13ITG45013_s_at	AP13ISTG45013	1056.45	417.34	890.713	867.088	0.39504	0.973476
LOC_Os04g53994	OTHSWCTG11203_s_at	OthsCTG11203	75.0777	18.9692	27.6659	19.8287	0.252661	0.71672
LOC_Os04g53994	AP13CTG32403_at	AP13CTG32403	30.5108	11.2528	41.2632	24.7634	0.368815	0.600134
LOC_Os04g53994	AP13CTG05362_at	AP13CTG05362	31.0198	15.5023	8.02821	7.78797	0.499756	0.970076
LOC_Os04g53990	AP13ITG38480_at	AP13ISTG38480	325.176	131.09	20.846	20.3344	0.403136	0.975458
LOC_Os04g53700	AP13CTG05151_at	AP13CTG05151	14.6438	5.61791	46.2476	40.9691	0.383638	0.885864
LOC_Os04g53540	AP13CTG23667_s_at	AP13CTG23667	231.756	91.3166	1154.83	922.903	0.39402	0.799169
LOC_Os04g53540	KanlowCTG02214_s_at	KanlCTG02214	64.2318	30.9098	315.93	365.266	0.481223	1.15616
LOC_Os04g53460	OTHSWCTG03797_x_at	OthsCTG03797	116.982	15.2378	34.2896	20.9985	0.130258	0.612388
LOC_Os04g53460	OTHSWSLT23496_at	OthsSGLT23496	35.7953	13.8409	26.2765	13.5076	0.386668	0.514057
LOC_Os04g53350	KanlowCTG04111_s_at	KanlCTG04111	168.322	44.6188	1060.14	965.464	0.26508	0.910697
LOC_Os04g53350	AP13CTG02334_at	AP13CTG02334	75.3225	15.9259	280.684	293.093	0.211436	1.04421
LOC_Os04g53300	AP13CTG58929_s_at	AP13CTG58929	488.325	67.0946	6842.52	5367.5	0.137398	0.784433
LOC_Os04g53160	AP13CTG19837_at	AP13CTG19837	54.4063	11.835	22.6296	14.0742	0.21753	0.62194
LOC_Os04g53160	AP13CTG26708_at	AP13CTG26708	139.667	31.4168	67.2222	44.215	0.22494	0.657744
LOC_Os04g53160	KanlowCTG44047_s_at	KanlCTG44047	133.996	66.5658	99.4029	61.5714	0.496774	0.619413
LOC_Os04g53160	AP13ITG72788_at	AP13ISTG72788	89.8845	30.0559	32.1518	22.7127	0.334384	0.706419
LOC_Os04g53160	OTHSWSLT31449_at	OthsSGLT31449	398.942	196.135	280.307	138.266	0.491638	0.493267
LOC_Os04g53120	AlamoCTG13711_at	AlamCTG13711	194.827	76.311	175.841	148.721	0.391686	0.845771
LOC_Os04g53050	AP13ITG43037_at	AP13ISTG43037	901.199	420.283	1020.76	430.798	0.46636	0.422037
LOC_Os04g52960	KanlowCTG44498_at	KanlCTG44498	1696.24	350.387	4147.79	2469.73	0.206567	0.595434
LOC_Os04g52890	KanlowCTG12496_at	KanlCTG12496	1213.54	582.641	1222.16	1152.5	0.480116	0.943005
LOC_Os04g52690	AP13CTG13376_s_at	AP13CTG13376	297.812	61.48	182.909	114.588	0.206439	0.626474
LOC_Os04g52660	KanlowCTG24541_s_at	KanlCTG24541	474.459	155.432	432.244	140.557	0.327598	0.325179
LOC_Os04g52660	KanlowCTG42849_at	KanlCTG42849	73.4952	25.6564	111.339	57.1606	0.349089	0.513391
LOC_Os04g52660	AP13CTG14167_s_at	AP13CTG14167	466.893	42.0804	229.923	133.154	0.0901286	0.579122
LOC_Os04g52300	AP13ITG75140_at	AP13ISTG75140	114.962	52.7719	70.8012	37.5	0.459039	0.529652
LOC_Os04g52164	AP13ITG57260_at	AP13ISTG57260	212.132	69.3097	334.713	266.929	0.326729	0.797485
LOC_Os04g52050	AP13CTG30299_at	AP13CTG30299	176.222	43.1402	94.58	40.5285	0.244807	0.428511
LOC_Os04g51830	KanlowCTG25253RC_at	KanlCTG25253-RC	117.535	46.3798	34.5652	52.8957	0.394604	1.53032
LOC_Os04g51560	AP13CTG27461_at	AP13CTG27461	420.242	199.509	199.701	152.748	0.474748	0.764883
LOC_Os04g51440	AP13CTG25103_at	AP13CTG25103	149.261	32.5411	65.9574	28.4765	0.218014	0.43174
LOC_Os04g51340	AP13CTG12959_s_at	AP13CTG12959	85.1667	32.6456	1337.4	999.751	0.383315	0.747532
LOC_Os04g51190	KanlowCTG21065RC_at	KanlCTG21065-RC	484.393	180.784	1038.29	975.501	0.373218	0.939523
LOC_Os04g51190	AP13CTG10841RC_s_at	AP13CTG10841-RC	342.509	148.344	747.059	734.256	0.43311	0.982862
LOC_Os04g51180	OTHSWSLT29181_at	OthsSGLT29181	29.8841	13.8087	16.2464	11.3169	0.462074	0.696581
LOC_Os04g51150	AP13CTG27916RC_at	AP13CTG27916-RC	36.4151	14.0341	37.0282	42.7786	0.385393	1.1553
LOC_Os04g51110	AP13ITG40332_s_at	AP13ISTG40332	87.7306	38.4073	167.376	112.751	0.437787	0.673642
LOC_Os04g50090	AP13ITG75724RC_s_at	AP13ISTG75724-RC	145.829	60.84	666.687	676.172	0.4172	1.01423
LOC_Os04g49954	KanlowCTG39487_at	KanlCTG39487	43.9243	21.0392	8.82562	8.00942	0.478988	0.907519
LOC_Os04g49748	OTHSWCTG13418_at	OthsCTG13418	150.667	70.5236	123.379	112.378	0.468077	0.910839
LOC_Os04g49370	AP13CTG21138_s_at	AP13CTG21138	1351.47	588.19	317.983	279.185	0.435223	0.877988
LOC_Os04g49350	AP13CTG27345_s_at	AP13CTG27345	42.4016	19.234	85.3562	84.7463	0.453615	0.992854
LOC_Os04g49130	KanlowCTG35328_at	KanlCTG35328	255.557	109.962	331.041	231.391	0.430285	0.69898
LOC_Os04g49130	KanlowCTG35328_s_at	KanlCTG35328	129.401	54.275	164.282	152.094	0.419434	0.925807
LOC_Os04g48790	AP13CTG01756_s_at	AP13CTG01756	1391.3	694.581	90.5292	44.7999	0.499232	0.494867
LOC_Os04g48490	KanlowCTG10618_s_at	KanlCTG10618	438.088	202.954	933.786	411.594	0.463272	0.44078
LOC_Os04g48416	KanlowCTG19900_at	KanlCTG19900	150.155	37.4161	1845.81	1223.22	0.249183	0.662701
LOC_Os04g48416	KanlowCTG19971_at	KanlCTG19971	72.5899	17.9777	870.501	891.529	0.247661	1.02416
LOC_Os04g48160	AP13ITG60968_at	AP13ISTG60968	464.929	147.122	1185.47	690.198	0.316439	0.582213
LOC_Os04g47780	AP13CTG27519_at	AP13CTG27519	1473.48	673.287	202.27	123.937	0.456938	0.61273
LOC_Os04g47770	AP13CTG17417_x_at	AP13CTG17417	27.3924	9.59848	78.0574	65.5815	0.350407	0.84017
LOC_Os04g47690	OTHSWCTG08870_s_at	OthsCTG08870	634.746	311.91	1464	1256.34	0.491393	0.858153
LOC_Os04g47360	AP13ITG41920_at	AP13ISTG41920	138.702	35.4193	71.0278	27.6978	0.255362	0.389957
LOC_Os04g47040	AP13ITG76661_at	AP13ISTG76661	147.651	48.4005	984.198	363.298	0.327803	0.369131
LOC_Os04g46990	KanlowCTG07013_x_at	KanlCTG07013	214.588	95.6424	996.86	727.119	0.445703	0.729409
LOC_Os04g46830	AP13CTG54097_at	AP13CTG54097	150.652	40.0289	4771.78	2808.19	0.265704	0.588499
LOC_Os04g46830	KanlowCTG46024_s_at	KanlCTG46024	249.904	84.0092	7915.99	3493.38	0.336166	0.441307
LOC_Os04g46730	OTHSWCTG17639_s_at	OthsCTG17639	1004.11	456.736	413.249	172.181	0.454868	0.416653
LOC_Os04g46310	AP13CTG17727_s_at	AP13CTG17727	66.317	33.0236	30.963	21.5381	0.497965	0.695606
LOC_Os04g46310	OTHSWCTG17772_s_at	OthsCTG17772	129.042	59.7371	52.7212	43.1778	0.462927	0.818983
LOC_Os04g45970	AP13CTG14427_at	AP13CTG14427	227.549	113.682	1067.9	1530.87	0.499591	1.43354
LOC_Os04g45850	AlamoCTG12813_at	AlamCTG12813	186.149	14.0075	156.295	14.7891	0.0752489	0.0946232
LOC_Os04g45070	AP13CTG26504_at	AP13CTG26504	54.2848	25.9522	20.5353	16.4751	0.478075	0.802283
LOC_Os04g44910	AP13ITG42698_at	AP13ISTG42698	279.373	133.9	70.4304	58.0063	0.479287	0.823598
LOC_Os04g44610	KanlowCTG19253_s_at	KanlCTG19253	157.723	65.7139	541.245	582.082	0.416641	1.07545
LOC_Os04g44530	OTHSWCTG05847_at	OthsCTG05847	207.228	100.344	146.049	67.8877	0.484222	0.464827
LOC_Os04g44320	AP13ITG57354_at	AP13ISTG57354	793.603	342.715	346.091	316.421	0.431847	0.914271
LOC_Os04g43840	KanlowCTG42028_s_at	KanlCTG42028	367.128	20.3987	147.545	74.6307	0.0555631	0.505818
LOC_Os04g43390	AP13ITG59973_at	AP13ISTG59973	352.985	158.728	23.4935	15.7892	0.449672	0.672067
LOC_Os04g42430	OTHSWSLT25531_at	OthsSGLT25531	30.3619	14.7849	34.1122	19.361	0.486954	0.567566
LOC_Os04g42340	KanlowCTG23829_at	KanlCTG23829	1801.79	870.083	1413.45	897.666	0.482899	0.635087
LOC_Os04g42130	AP13ITG62602_at	AP13ISTG62602	227.549	110.756	78.0162	39.0737	0.486736	0.500841
LOC_Os04g42020	AP13CTG29933_s_at	AP13CTG29933	309.85	110.727	196.72	171.875	0.357358	0.873704
LOC_Os04g41250	KanlowCTG24850RC_at	KanlCTG24850-RC	32.2317	15.8651	16.1673	14.0594	0.49222	0.869618
LOC_Os04g40730	KanlowCTG18818_at	KanlCTG18818	153.855	64.4699	1197.18	760.094	0.419031	0.634904
LOC_Os04g40630	AP13CTG24570_s_at	AP13CTG24570	60.9634	26.8487	16.6298	17.3944	0.440408	1.04598
LOC_Os04g40470	AP13ITG67659_at	AP13ISTG67659	992.606	400.377	445.733	444.204	0.40336	0.99657
LOC_Os04g39880	OTHSWSLT23951_s_at	OthsSGLT23951	92.2516	43.1115	89.4781	100.429	0.467325	1.12239
LOC_Os04g39880	AP13CTG05855_x_at	AP13CTG05855	54.0123	23.1558	68.5951	75.8573	0.428714	1.10587
LOC_Os04g39880	KanlowCTG03580_at	KanlCTG03580	181.454	18.2121	8097.78	5423.76	0.100368	0.669784
LOC_Os04g39610	KanlowCTG19501_at	KanlCTG19501	160.619	70.9917	312.455	329.795	0.441987	1.0555
LOC_Os04g39444	AlamoCTG01691_at	AlamCTG01691	95.046	22.9135	127.486	26.3472	0.241078	0.206668
LOC_Os04g39430	KanlowCTG18647_s_at	KanlCTG18647	128.482	59.2252	212.719	147.631	0.46096	0.694017
LOC_Os04g39210	AP13ITG55555_at	AP13ISTG55555	2899.72	1318.86	192.061	222.995	0.454824	1.16106
LOC_Os04g39150	AP13CTG53749_at	AP13CTG53749	190.311	87.4287	4125.38	4170.63	0.459398	1.01097
LOC_Os04g38600	VS16ITG05042_s_at	VS16ISTG05042	471.691	216.049	2385.43	1841.24	0.458032	0.77187
LOC_Os04g38570	AP13ITG53820_at	AP13ISTG53820	424.622	207.577	657.367	692.681	0.488851	1.05372
LOC_Os04g38570	AP13CTG29300_s_at	AP13CTG29300	43.9096	20.0957	705.107	609.006	0.457662	0.863707
LOC_Os04g37760	AP13CTG15340_at	AP13CTG15340	1020.76	358.348	1937.94	2079.03	0.351061	1.0728
LOC_Os04g37760	KanlowCTG20971_at	KanlCTG20971	133.919	50.2906	292.118	260.489	0.37553	0.891724
LOC_Os04g37530	AP13CTG17748_at	AP13CTG17748	68.139	32.8735	102.198	95.4361	0.482448	0.93384
LOC_Os04g35990	AP13ITG42874_at	AP13ISTG42874	167.767	71.5266	204.395	154.358	0.426346	0.755195
LOC_Os04g35990	KanlowCTG19233_s_at	KanlCTG19233	181.832	84.7422	139.186	102.923	0.466046	0.739467
LOC_Os04g35840	KanlowCTG44259_at	KanlCTG44259	1698.49	771.872	648.628	369.868	0.454446	0.570231
LOC_Os04g35260	OTHSWCTG21202_s_at	OthsCTG21202	40.4721	19.3305	30.8854	18.6117	0.477625	0.602605
LOC_Os04g35020	AP13ITG76341_at	AP13ISTG76341	25.7308	12.2584	260.079	357.089	0.476411	1.373
LOC_Os04g33860	AP13CTG19061_s_at	AP13CTG19061	489.447	218.275	45.7858	31.3699	0.445962	0.685143
LOC_Os04g33370	KanlowCTG13484_s_at	KanlCTG13484	161.145	72.8301	864.322	600.621	0.451954	0.694905
LOC_Os04g33370	AP13CTG21492_s_at	AP13CTG21492	461.54	216.954	870.333	788.412	0.470066	0.905873
LOC_Os04g33210	KanlowCTG44515_s_at	KanlCTG44515	72.5202	22.5251	95.3537	33.0712	0.310605	0.346826
LOC_Os04g32950	OTHSWCTG12470_at	OthsCTG12470	653.139	319.603	2013.12	1635.4	0.489334	0.812369
LOC_Os04g32480	AP13ITG74967_at	AP13ISTG74967	546.879	106.932	65.3883	69.6608	0.195532	1.06534
LOC_Os04g32350	AlamoCTG08083_s_at	AlamCTG08083	36.2662	12.9803	41.2125	61.2987	0.357918	1.48738
LOC_Os04g32270	KanlowCTG05374_s_at	KanlCTG05374	161.481	62.2953	1536.49	1082.49	0.385776	0.704521
LOC_Os04g31924	AP13ITG76778_at	AP13ISTG76778	93.0632	45.4733	100.094	56.2979	0.488629	0.562448
LOC_Os04g31924	AP13CTG05750_s_at	AP13CTG05750	1247.84	545.167	650.977	411.99	0.436889	0.632878
LOC_Os04g31924	AP13CTG05750_at	AP13CTG05750	407.684	201.697	129.089	101.147	0.49474	0.783549
LOC_Os04g31924	OTHSWCTG19454_s_at	OthsCTG19454	879.255	401.746	1332.61	1097.52	0.456916	0.823591
LOC_Os04g31700	AP13CTG53359_s_at	AP13CTG53359	504.951	199.485	1341.39	952.4	0.395059	0.710009
LOC_Os04g30760	KanlowCTG27124_at	KanlCTG27124	62.3481	30.3791	49.8807	41.9366	0.48725	0.840739
LOC_Os04g30420	AP13ITG54793_at	AP13ISTG54793	636.938	284.111	330.571	180.394	0.446058	0.545704
LOC_Os04g28580	AlamoCTG05276_at	AlamCTG05276	138.194	62.7006	72.0107	87.4602	0.453714	1.21454
LOC_Os04g28420	OTHSWCTG05141_s_at	OthsCTG05141	388.061	55.5911	193.853	75.6725	0.143254	0.390361
LOC_Os04g28180	AlamoCTG04084_at	AlamCTG04084	170.566	33.1317	96.0169	66.9056	0.194245	0.696811
LOC_Os04g27610	KanlowSLT55878_at	KanlSGLT55878	45.131	19.0949	38.7689	29.2433	0.4231	0.754297
LOC_Os04g27610	OTHSWCTG06260_at	OthsCTG06260	62.6315	19.6641	51.4468	34.6146	0.313965	0.672824
LOC_Os04g27020	AP13CTG69193_at	AP13CTG69193	160.558	67.8942	1291.72	2113.51	0.422865	1.6362
LOC_Os04g26910	AP13ITG62309_at	AP13ISTG62309	100.781	37.0576	1319.18	1728.39	0.367705	1.3102
LOC_Os04g25780	AP13CTG13500_at	AP13CTG13500	67.9334	30.9129	56.306	36.562	0.455048	0.649345
LOC_Os04g25520	AP13CTG14143_s_at	AP13CTG14143	347.299	107.407	714.263	374.842	0.309265	0.524795
LOC_Os04g25520	AlamoCTG06438_s_at	AlamCTG06438	310.579	8.86503	201.755	69.2051	0.0285435	0.343015
LOC_Os04g24478	AP13ITG62412_s_at	AP13ISTG62412	1071.25	464.514	773.367	744.452	0.433619	0.962612
LOC_Os04g24469	AP13CTG07769_at	AP13CTG07769	535.599	211.674	1320.57	932.8	0.39521	0.70636
LOC_Os04g23550	KanlowCTG23668_s_at	KanlCTG23668	673.287	287.931	87.4602	59.3529	0.427649	0.678628
LOC_Os04g23550	AP13ITG40657_s_at	AP13ISTG40657	469.577	225.323	141.147	89.2889	0.479842	0.632596
LOC_Os04g21320	AP13ITG64245_at	AP13ISTG64245	539.48	220.663	1986.07	2048.79	0.40903	1.03158
LOC_Os04g19684	OTHSWCTG31950_at	OthsCTG31950	54.0305	19.8525	78.2261	15.869	0.367431	0.202861
LOC_Os04g18200	AP13CTG15670_at	AP13CTG15670	424.61	190.183	494.699	533.755	0.447902	1.07895
LOC_Os04g16680	AP13CTG02780_at	AP13CTG02780	521.103	229.126	697.332	505.06	0.439695	0.724275
LOC_Os04g15630	KanlowCTG38939_at	KanlCTG38939	91.5485	43.3124	86.3011	56.9201	0.473109	0.659552
LOC_Os04g13640	AP13CTG49083_at	AP13CTG49083	42.5177	20.6459	15.5864	15.0846	0.485583	0.967807
LOC_Os04g13470	AP13CTG29084_s_at	AP13CTG29084	476.086	237.777	261.165	141.044	0.499441	0.540057
LOC_Os04g12970	AP13ITG38511_s_at	AP13ISTG38511	88.9809	33.999	650.352	929.322	0.382093	1.42895
LOC_Os04g12840	KanlowCTG33128_at	KanlCTG33128	34.7964	16.515	60.1093	40.6509	0.474618	0.676284
LOC_Os04g11810	AP13CTG15650_at	AP13CTG15650	716.592	155.558	5025.35	2809.4	0.21708	0.559046
LOC_Os04g10460	AP13ITG54794_at	AP13ISTG54794	121.021	42.0784	52.5656	24.2947	0.347694	0.462178
LOC_Os04g10160	KanlowCTG12932_s_at	KanlCTG12932	685.43	173.75	3225.3	5205.07	0.25349	1.61383
LOC_Os04g10160	KanlowCTG13984_x_at	KanlCTG13984	122.45	41.5685	828.993	1652.04	0.339474	1.99283
LOC_Os04g10160	KanlowCTG21384_x_at	KanlCTG21384	168.314	69.5507	479.397	659.399	0.413221	1.37548
LOC_Os04g10160	AP13CTG20898_x_at	AP13CTG20898	273.505	47.9743	1299.25	2988.09	0.175405	2.29986
LOC_Os04g02780	AP13CTG09205_s_at	AP13CTG09205	334.318	158.728	217.397	151.53	0.47478	0.697021
LOC_Os04g01960	KanlowCTG07087_s_at	KanlCTG07087	150.213	69.8788	418.222	382.02	0.465198	0.913437
LOC_Os04g01540	AP13CTG29075_s_at	AP13CTG29075	1271.41	584.296	1004.11	820.374	0.459564	0.817019
LOC_Os04g01540	KanlowCTG22702_s_at	KanlCTG22702	1635.58	554.172	747.131	623.86	0.338823	0.835008
LOC_Os04g01480	AP13CTG17985_at	AP13CTG17985	75.4238	32.786	81.7006	41.8078	0.43469	0.51172
LOC_Os04g01340	AP13CTG30334_at	AP13CTG30334	161.457	77.1936	43.7395	34.7854	0.478105	0.795284
LOC_Os04g01300	KanlowCTG12168_s_at	KanlCTG12168	1380.4	145.135	1273.88	501.475	0.10514	0.393661
LOC_Os04g01290	AP13CTG08248_at	AP13CTG08248	578.617	56.0568	663.986	214.111	0.0968807	0.322464
LOC_Os04g01230	AlamoCTG04424_s_at	AlamCTG04424	328.565	124.983	1536.05	1445.09	0.380391	0.940787
LOC_Os03g64080	KanlowCTG38675_at	KanlCTG38675	78.2227	27.9827	40.0855	55.5495	0.357731	1.38577
LOC_Os03g64050	AP13ITG71590RC_at	AP13ISTG71590-RC	111.462	50.9386	716.592	650.509	0.457004	0.907781
LOC_Os03g63490	AP13ITG71057_at	AP13ISTG71057	160.365	65.5815	55.7487	55.3317	0.408951	0.99252
LOC_Os03g63390	AP13ITG63169_at	AP13ISTG63169	1944.26	558.746	76.6603	70.2784	0.287382	0.91675
LOC_Os03g63370	AP13ITG74075RC_at	AP13ISTG74075-RC	158.744	5.64138	208.76	267.812	0.0355377	1.28287
LOC_Os03g63074	AP13CTG13344_at	AP13CTG13344	13.9583	4.46915	10.8552	10.5474	0.320178	0.971648
LOC_Os03g62910	OTHSWCTG35877_at	OthsCTG35877	138.41	65.8056	104.714	58.1339	0.475439	0.555168
LOC_Os03g62790	AP13ITG38566_s_at	AP13ISTG38566	2054.28	865.941	503.28	376.109	0.421531	0.747317
LOC_Os03g62780	AP13CTG19782_at	AP13CTG19782	892.85	260.489	428.547	270.003	0.29175	0.630041
LOC_Os03g62780	AP13CTG29679_s_at	AP13CTG29679	431.046	124.862	306.759	70.5219	0.289672	0.229894
LOC_Os03g62780	AP13ITG34400_s_at	AP13ISTG34400	156.497	28.9063	54.4063	27.8817	0.184708	0.512472
LOC_Os03g62730	AlamoCTG13222_at	AlamCTG13222	53.4777	19.3156	44.6704	30.9367	0.36119	0.692555
LOC_Os03g62650	KanlowSLT51673_s_at	KanlSGLT51673	1305.93	545.01	586.187	243.899	0.417333	0.416077
LOC_Os03g61960	KanlowCTG00753_at	KanlCTG00753	135.788	20.3497	95.2378	188.779	0.149863	1.98218
LOC_Os03g61570	AP13ITG67688_at	AP13ISTG67688	251.616	124.799	331.351	121.534	0.495991	0.366783
LOC_Os03g60910	KanlowCTG37208_s_at	KanlCTG37208	453.537	211.022	736.951	503.352	0.465279	0.68302
LOC_Os03g60850	AP13ITG72097_at	AP13ISTG72097	8573.7	4262.55	65.8179	71.5906	0.497166	1.08771
LOC_Os03g60620	AP13CTG02833_s_at	AP13CTG02833	649.556	15.7163	217.552	223.647	0.0241954	1.02802
LOC_Os03g60620	KanlowCTG02569_at	KanlCTG02569	1627.92	25.5067	771.872	749.774	0.0156682	0.971371
LOC_Os03g60480	AP13ITG54550_at	AP13ISTG54550	133.641	65.6983	739.31	482.902	0.491603	0.65318
LOC_Os03g60400	KanlowCTG45836_at	KanlCTG45836	112.989	47.8915	73.0024	66.0598	0.423861	0.9049
LOC_Os03g60100	AP13ITG37877_at	AP13ISTG37877	56.1243	16.122	234.396	145.05	0.287256	0.618825
LOC_Os03g60030	AP13CTG10294_s_at	AP13CTG10294	34.783	16.7991	68.2523	16.5068	0.482968	0.241849
LOC_Os03g60030	AP13CTG30779_s_at	AP13CTG30779	117.75	48.0015	112.475	55.8237	0.407658	0.49632
LOC_Os03g59640	OTHSWCTG02826_s_at	OthsCTG02826	151.171	62.1989	364.592	287.158	0.411448	0.787615
LOC_Os03g59480	AP13ITG40496_s_at	AP13ISTG40496	132.543	40.9271	115.795	36.457	0.308785	0.314842
LOC_Os03g59450	AlamoCTG14784_s_at	AlamCTG14784	40.9474	16.7543	32.4049	47.2174	0.409167	1.45711
LOC_Os03g59080	KanlowCTG19634_at	KanlCTG19634	56.306	20.3665	34.4756	30.6566	0.361711	0.889227
LOC_Os03g59080	KanlowCTG19634_s_at	KanlCTG19634	170.712	68.6199	174.425	173.75	0.401962	0.996128
LOC_Os03g58940	KanlowCTG07364_s_at	KanlCTG07364	273.505	26.011	457.285	377.495	0.0951026	0.825513
LOC_Os03g58900	AP13CTG32627_s_at	AP13CTG32627	24.2567	9.03703	12.1358	14.4331	0.372558	1.1893
LOC_Os03g58780	AP13CTG03162_at	AP13CTG03162	479.397	126.833	272.007	252.573	0.264567	0.92855
LOC_Os03g58600	AP13CTG31992_s_at	AP13CTG31992	246.603	81.2031	120.677	77.7383	0.329286	0.644184
LOC_Os03g58430	AP13ITG71579_at	AP13ISTG71579	39.2889	18.6254	39.0924	18.2121	0.474064	0.465874
LOC_Os03g58340	AP13.12220.m00014_s_at	AP13_model_12220.m00014	397.669	186.756	532.819	355.872	0.469626	0.667905
LOC_Os03g58170	VS16ITG01008RC_s_at	VS16ISTG01008-RC	5875.74	2797.92	3705.43	4466.75	0.476182	1.20546
LOC_Os03g58130	AlamoCTG03912_at	AlamCTG03912	1590.68	314.628	1039.52	401.861	0.197795	0.386585
LOC_Os03g57940	AlamoCTG11164_s_at	AlamCTG11164	24.3456	9.41531	13.3694	10.4993	0.386736	0.785319
LOC_Os03g57780	KanlowCTG12292_at	KanlCTG12292	60.767	21.2222	506.78	447.874	0.349239	0.883763
LOC_Os03g57690	AP13CTG31837_s_at	AP13CTG31837	150.354	75.0632	609.591	628.169	0.499244	1.03048
LOC_Os03g57330	AlamoCTG09734_at	AlamCTG09734	1296.41	149.376	1093.86	553.415	0.115222	0.505927
LOC_Os03g57220	AP13ITG40336_at	AP13ISTG40336	119.033	55.6965	624.459	633.389	0.467909	1.0143
LOC_Os03g57149	AP13ITG70523_at	AP13ISTG70523	170.403	75.0777	524.601	304.437	0.440589	0.580321
LOC_Os03g57140	KanlowCTG35557_at	KanlCTG35557	43.428	17.1484	32.5099	17.877	0.394869	0.549895
LOC_Os03g56869	OTHSWCTG15437_at	OthsCTG15437	33.9667	7.28575	71.0278	7.56592	0.214497	0.106521
LOC_Os03g56760	AP13CTG37367_at	AP13CTG37367	202.737	10.5766	38.0629	16.5096	0.0521692	0.433745
LOC_Os03g56760	AP13ITG37368_s_at	AP13ISTG37368	95.0095	31.3699	38.9476	33.4559	0.330176	0.858998
LOC_Os03g56630	KanlowCTG24972_at	KanlCTG24972	66.027	24.8483	68.2367	27.4641	0.376336	0.402484
LOC_Os03g56580	AP13ITG57822_at	AP13ISTG57822	67.5453	24.9128	24.8901	27.1901	0.368831	1.0924
LOC_Os03g56050	AP13ITG38806_s_at	AP13ISTG38806	102.894	35.9987	223.668	243.068	0.349863	1.08673
LOC_Os03g55820	AP13CTG03373_at	AP13CTG03373	173.695	49.2209	106.706	45.1854	0.283376	0.423455
LOC_Os03g55720	KanlowCTG05192_s_at	KanlCTG05192	138.224	48.1677	1944.82	972.272	0.348475	0.499928
LOC_Os03g55420	AP13CTG23191RC_at	AP13CTG23191-RC	70.4	30.4843	609.24	747.561	0.433015	1.22704
LOC_Os03g55420	AP13ITG69997RC_at	AP13ISTG69997-RC	331.993	161.211	1013.9	1141.68	0.485585	1.12603
LOC_Os03g55350	AP13ITG59100_at	AP13ISTG59100	725.487	184.432	2218.05	2265.64	0.254219	1.02145
LOC_Os03g55240	AP13ITG70365_at	AP13ISTG70365	227.549	110.703	1049.2	2105.78	0.486503	2.00703
LOC_Os03g55180	AP13CTG19932_s_at	AP13CTG19932	112.216	51.2882	162.604	188.38	0.457047	1.15852
LOC_Os03g55150	AlamoCTG10891_at	AlamCTG10891	114.588	53.4662	50.0391	33.1794	0.466595	0.66307
LOC_Os03g55120	KanlowCTG37613_s_at	KanlCTG37613	120.285	46.3887	504.296	497.854	0.385657	0.987226
LOC_Os03g55040	AP13ITG70945_s_at	AP13ISTG70945	232.33	114.962	38.3782	56.4765	0.494819	1.47158
LOC_Os03g55030	KanlowCTG06441_at	KanlCTG06441	229.126	71.3471	5635.44	4672.68	0.311387	0.82916
LOC_Os03g55010	AP13ITG70226_at	AP13ISTG70226	660.669	303.061	797.884	657.114	0.458718	0.823571
LOC_Os03g54870	AP13CTG05164_at	AP13CTG05164	247.428	81.9972	192.098	138.628	0.331398	0.721653
LOC_Os03g52880	AP13CTG27793_at	AP13CTG27793	129.749	29.7625	53.4572	51.63	0.229385	0.96582
LOC_Os03g52670	AP13ITG34715_s_at	AP13ISTG34715	17.6926	8.75435	8.89383	6.63643	0.494802	0.746184
LOC_Os03g52320	AP13ITG64499_s_at	AP13ISTG64499	274.374	133.391	2396.09	2538.98	0.486164	1.05964
LOC_Os03g52239	AP13ITG62675_at	AP13ISTG62675	88.991	34.5898	17.4703	12.3951	0.388689	0.709497
LOC_Os03g51970	AP13CTG01772_s_at	AP13CTG01772	53.204	25.6564	330.85	297.442	0.482227	0.899022
LOC_Os03g51600	KanlowCTG14168_s_at	KanlCTG14168	2867.75	1374.8	1116.69	879.699	0.479402	0.787776
LOC_Os03g51430	AP13CTG03737_at	AP13CTG03737	37.8363	15.8354	194.345	226.823	0.418523	1.16712
LOC_Os03g51430	AP13CTG03737_s_at	AP13CTG03737	143.429	46.987	338.969	353.414	0.327598	1.04262
LOC_Os03g50420	AP13ITG40788_s_at	AP13ISTG40788	57.3036	16.6734	237.349	327.517	0.290966	1.37989
LOC_Os03g50420	AP13CTG26742_s_at	AP13CTG26742	23.4111	11.0442	535.624	411.594	0.471751	0.768438
LOC_Os03g50390	AP13ITG42992_s_at	AP13ISTG42992	628.471	257.787	254.238	171.292	0.410181	0.673746
LOC_Os03g49880	KanlowCTG43170_at	KanlCTG43170	47.3399	21.5563	186.765	196.559	0.455351	1.05244
LOC_Os03g49620	AP13ITG76698_at	AP13ISTG76698	70.605	22.4211	39.0737	22.0848	0.317556	0.56521
LOC_Os03g49600	AP13.12929.m00008_s_at	AP13_model_12929.m00008	1777.58	401.012	5113.28	4225.8	0.225594	0.826435
LOC_Os03g49440	AP13ITG52662_at	AP13ISTG52662	482.435	240.57	125.329	93.0271	0.498658	0.742262
LOC_Os03g49200	AP13ITG35006_at	AP13ISTG35006	58.8723	7.83612	18.1212	11.2081	0.133104	0.618503
LOC_Os03g48430	AP13ITG35866_s_at	AP13ISTG35866	435.627	179.838	111.462	198.253	0.412826	1.77866
LOC_Os03g47980	AP13CTG27185_at	AP13CTG27185	151.167	70.0348	236.455	159.28	0.463294	0.673617
LOC_Os03g47940	KanlowCTG05391_at	KanlCTG05391	31.4928	15.5497	1109.77	958.887	0.493756	0.864039
LOC_Os03g47270	AP13CTG24555_at	AP13CTG24555	959.44	455.787	7946.19	9476.5	0.475056	1.19258
LOC_Os03g46440	AP13ITG46268_at	AP13ISTG46268	153.818	25.1091	18.7694	12.6907	0.163239	0.676139
LOC_Os03g46440	AP13CTG04670_at	AP13CTG04670	1226.25	597.504	76.646	86.5478	0.487262	1.12919
LOC_Os03g46070	KanlowCTG17286_s_at	KanlCTG17286	126.286	44.7935	59.3145	92.7373	0.354698	1.56349
LOC_Os03g45619	AP13CTG08152_at	AP13CTG08152	104.714	17.2803	3209.48	2436.43	0.165023	0.759135
LOC_Os03g45619	AP13CTG03270_s_at	AP13CTG03270	142.602	55.1435	5447.23	5338.49	0.386696	0.980038
LOC_Os03g45270	AP13ITG62034_at	AP13ISTG62034	127.73	38.3449	92.0923	81.1362	0.300204	0.881032
LOC_Os03g45260	AP13CTG59162_at	AP13CTG59162	483.544	152.745	314.084	202.27	0.315887	0.643999
LOC_Os03g43840	AP13CTG17209_at	AP13CTG17209	395.852	12.1493	86.6392	13.6088	0.0306916	0.157074
LOC_Os03g43650	AP13ITG37114_s_at	AP13ISTG37114	4632.27	2151.11	532.155	415.963	0.464375	0.781658
LOC_Os03g43580	AP13ITG54205_at	AP13ISTG54205	47.9106	21.1121	75.85	60.0372	0.440656	0.791525
LOC_Os03g43410	AP13ITG69368RC_s_at	AP13ISTG69368-RC	75.3587	37.0724	151.802	132.718	0.491946	0.874281
LOC_Os03g42380	OTHSWCTG32475_at	OthsCTG32475	221.369	11.1491	110.39	7.86299	0.0503642	0.0712293
LOC_Os03g41330	AP13CTG23514_at	AP13CTG23514	1230.48	584.969	471.317	260.079	0.475398	0.551813
LOC_Os03g40670	AP13CTG09527_s_at	AP13CTG09527	219.044	105.817	381.543	388.256	0.483084	1.0176
LOC_Os03g40670	OTHSWCTG03314_at	OthsCTG03314	134.364	61.1154	200.16	194.03	0.45485	0.969377
LOC_Os03g40130	KanlowCTG28106_s_at	KanlCTG28106	164.85	44.1687	9.25373	9.03611	0.267933	0.976483
LOC_Os03g39000	AP13CTG27136_at	AP13CTG27136	49.5518	23.1079	46.8932	21.6463	0.466337	0.461608
LOC_Os03g32050	AP13ITG45454_s_at	AP13ISTG45454	66.9118	19.981	285.175	253.39	0.298616	0.888544
LOC_Os03g32050	AP13ITG45453_s_at	AP13ISTG45453	30.9367	14.0785	90.0388	101.858	0.455075	1.13126
LOC_Os03g31740	KanlowCTG35024_at	KanlCTG35024	72.5481	34.421	57.1112	60.1425	0.474457	1.05308
LOC_Os03g31010	OTHSWCTG08631_s_at	OthsCTG08631	136.6	56.3141	87.7348	54.7742	0.412254	0.624315
LOC_Os03g31010	OTHSWCTG08631_at	OthsCTG08631	75.4854	25.0238	30.0763	20.4639	0.331505	0.6804
LOC_Os03g30920	AlamoCTG03838_s_at	AlamCTG03838	267.185	120.285	196.182	131.22	0.450193	0.668872
LOC_Os03g29950	KanlowCTG41711_at	KanlCTG41711	70.6304	12.3467	42.2892	22.6208	0.174807	0.534908
LOC_Os03g29740	OTHSWSLT23241_s_at	OthsSGLT23241	156.07	53.2994	148.179	111.527	0.34151	0.752648
LOC_Os03g29260	OTHSWCTG18171_at	OthsCTG18171	184.185	82.2689	317.487	315.362	0.446665	0.993307
LOC_Os03g29170	AP13CTG02927_at	AP13CTG02927	945.595	471.317	374.887	266.878	0.498435	0.711888
LOC_Os03g29170	AP13CTG04647_s_at	AP13CTG04647	789.168	381.873	873.853	956.252	0.483893	1.09429
LOC_Os03g29150	AP13ITG51564_s_at	AP13ISTG51564	760.094	335.363	432.244	273.44	0.441212	0.632605
LOC_Os03g28980	KanlowCTG19205_at	KanlCTG19205	989.143	230.155	4213.68	2077.39	0.232682	0.49301
LOC_Os03g27930	AP13CTG09017_at	AP13CTG09017	351.024	47.8783	491.438	222.882	0.136396	0.453531
LOC_Os03g27210	AP13ITG69519RC_at	AP13ISTG69519-RC	21.7969	10.6663	8.79113	7.83706	0.489349	0.891473
LOC_Os03g26910	KanlowCTG41704_s_at	KanlCTG41704	113.906	53.647	38.468	41.6589	0.470976	1.08295
LOC_Os03g26530	AP13ITG77098_at	AP13ISTG77098	18.2116	8.53542	30.3815	39.3285	0.468682	1.29449
LOC_Os03g26260	AP13CTG05428_at	AP13CTG05428	243.881	79.9008	30.7083	26.4062	0.327622	0.859906
LOC_Os03g26210	AP13CTG17601_at	AP13CTG17601	105.673	23.6703	20.9039	18.1412	0.223996	0.867838
LOC_Os03g26210	AP13CTG27301_s_at	AP13CTG27301	638.622	233.637	199.509	162.799	0.365846	0.815998
LOC_Os03g24940	AP13.12756.m00003_s_at	AP13_model_12756.m00003	19.1199	8.02327	121.07	93.0205	0.419629	0.76832
LOC_Os03g24940	AP13CTG12536_s_at	AP13CTG12536	148.06	60.767	999.751	814.649	0.410423	0.814852
LOC_Os03g24920	AP13CTG16081_at	AP13CTG16081	883.755	184.934	654.939	238.043	0.209259	0.363458
LOC_Os03g24730	KanlowCTG20243_s_at	KanlCTG20243	224.95	94.3555	105.969	117.923	0.41945	1.1128
LOC_Os03g24640	AP13ITG75222_at	AP13ISTG75222	5481.34	626.559	498.191	309.162	0.114308	0.620569
LOC_Os03g24640	AP13ITG75222_s_at	AP13ISTG75222	2522.35	318.622	182.939	107.278	0.126319	0.586417
LOC_Os03g24640	AP13ITG40542_at	AP13ISTG40542	2526.29	228.205	54.7979	55.8237	0.0903322	1.01872
LOC_Os03g24410	KanlowCTG40226_s_at	KanlCTG40226	142.56	36.2824	52.1725	21.9749	0.254507	0.421197
LOC_Os03g24220	AP13CTG17686_at	AP13CTG17686	222.39	101.164	1231.07	1027.71	0.454895	0.834807
LOC_Os03g24220	AP13CTG17686_s_at	AP13CTG17686	353.414	163.285	1596.69	1488.9	0.462021	0.932495
LOC_Os03g22810	KanlowCTG03981_s_at	KanlCTG03981	1536.79	731.649	2264.66	1852.27	0.47609	0.817902
LOC_Os03g22634	AP13CTG03477_s_at	AP13CTG03477	32.1508	7.31926	8.5142	6.32413	0.227654	0.742774
LOC_Os03g22360	AP13ITG61080_at	AP13ISTG61080	114.308	54.0201	72.5673	64.6786	0.472584	0.891292
LOC_Os03g22190	AP13ITG64410_at	AP13ISTG64410	44.3618	19.7783	19.0387	17.1686	0.445841	0.90177
LOC_Os03g22190	AlamoCTG14051_s_at	AlamCTG14051	194.606	86.7973	50.2131	46.5581	0.446015	0.92721
LOC_Os03g22140	AP13CTG25918_at	AP13CTG25918	21.9454	9.59848	14.0422	9.3829	0.437379	0.668193
LOC_Os03g21990	AlamoCTG08278_at	AlamCTG08278	2619.76	1269.09	3434.07	2272.62	0.484431	0.661786
LOC_Os03g21960	AP13ITG69825_s_at	AP13ISTG69825	84.1568	27.0743	39.8488	44.3331	0.321713	1.11253
LOC_Os03g21530	AlamoCTG05140_s_at	AlamCTG05140	1579.23	739.452	1547.48	952.126	0.468235	0.615277
LOC_Os03g20860	AP13CTG00941_at	AP13CTG00941	501.656	72.2889	340.274	176.919	0.144101	0.519932
LOC_Os03g20670	AP13CTG15038_at	AP13CTG15038	673.74	69.3608	271.123	335.469	0.102949	1.23733
LOC_Os03g20580	AlamoCTG06267_at	AlamCTG06267	31.3241	13.6962	98.4451	85.2014	0.437241	0.865471
LOC_Os03g20560	AP13ITG33723_s_at	AP13ISTG33723	97.5116	16.2237	35.1746	19.4738	0.166377	0.553632
LOC_Os03g20560	AP13ITG33726_s_at	AP13ISTG33726	143.517	18.0048	46.1348	18.7942	0.125454	0.407376
LOC_Os03g20560	AP13ITG33730RC_s_at	AP13ISTG33730-RC	62.4754	22.3361	27.6173	20.0048	0.357519	0.724357
LOC_Os03g18980	AP13CTG09397_s_at	AP13CTG09397	337.794	154.587	1156.12	1006.46	0.457637	0.870551
LOC_Os03g18950	AP13ITG70917_at	AP13ISTG70917	92.1064	38.6981	102.783	32.0069	0.420145	0.311402
LOC_Os03g18870	KanlowCTG27958RC_s_at	KanlCTG27958-RC	1515.63	745.883	1564.73	834.679	0.492127	0.533434
LOC_Os03g17930	AlamoCTG11816_s_at	AlamCTG11816	814.649	189.36	936.573	207.248	0.232443	0.221284
LOC_Os03g17760	AP13ITG56224RC_at	AP13ISTG56224-RC	258.53	24.2142	786.88	1096.07	0.0936611	1.39293
LOC_Os03g17730	AP13CTG11383_s_at	AP13CTG11383	2334.43	634.746	508.769	626.052	0.271906	1.23052
LOC_Os03g17480	AP13CTG16606_s_at	AP13CTG16606	858.516	381.415	852.791	1278.29	0.444272	1.49895
LOC_Os03g17270	KanlowCTG20371RC_at	KanlCTG20371-RC	86.5852	18.1266	32.0031	27.0036	0.20935	0.84378
LOC_Os03g16860	KanlowCTG01047_at	KanlCTG01047	395.34	191.341	141.098	209.383	0.483991	1.48395
LOC_Os03g16740	AP13CTG02846_at	AP13CTG02846	3022.86	1046.14	1923.58	1332.7	0.346078	0.692824
LOC_Os03g15930	AP13ITG65161_s_at	AP13ISTG65161	626.954	260.551	719.093	692.681	0.415583	0.963271
LOC_Os03g15810	AP13ITG67415_at	AP13ISTG67415	234.216	116.65	131.207	72.1173	0.498046	0.549645
LOC_Os03g15780	KanlowCTG10071_s_at	KanlCTG10071	214.588	97.6266	177.567	238.146	0.454949	1.34116
LOC_Os03g15780	AP13CTG04244_s_at	AP13CTG04244	1055.85	496.78	713.182	787.183	0.470503	1.10376
LOC_Os03g14170	AP13ITG59364RC_at	AP13ISTG59364-RC	125.393	45.7303	205.073	171.197	0.364696	0.834812
LOC_Os03g13970	AP13CTG00045_at	AP13CTG00045	1086.15	154.387	592.922	625.992	0.142142	1.05578
LOC_Os03g13960	AP13ITG63220_at	AP13ISTG63220	97.0641	39.8637	117.603	30.1522	0.410694	0.256389
LOC_Os03g13550	AP13CTG25293_at	AP13CTG25293	346.091	165.564	141.129	88.86	0.478383	0.629639
LOC_Os03g13300	KanlowCTG05883_s_at	KanlCTG05883	2702.42	695.399	1226.95	1076.18	0.257325	0.877111
LOC_Os03g13250	AlamoCTG02682_s_at	AlamCTG02682	1094.23	174.351	366	140.624	0.159336	0.384219
LOC_Os03g13250	KanlowCTG05735_s_at	KanlCTG05735	2551.18	372.441	800.755	283.273	0.145988	0.353757
LOC_Os03g12620	KanlowCTG05125_s_at	KanlCTG05125	1630.24	709.789	1686.75	1189.42	0.43539	0.705156
LOC_Os03g12500	AP13CTG43249_at	AP13CTG43249	177.996	68.3894	259.673	332.089	0.384219	1.27887
LOC_Os03g12390	AP13CTG10806_at	AP13CTG10806	609.006	293.558	333.152	327.863	0.482029	0.984125
LOC_Os03g12238	AP13CTG32560_at	AP13CTG32560	165.564	78.1091	63.5961	38.4914	0.471775	0.605248
LOC_Os03g12236	AP13CTG09832_at	AP13CTG09832	16.2024	7.06587	19.3156	11.1973	0.436099	0.579701
LOC_Os03g12160	AP13ITG41572_s_at	AP13ISTG41572	97.7691	24.28	85.2312	33.193	0.24834	0.389446
LOC_Os03g12150	AP13ITG71929_at	AP13ISTG71929	234.153	110.57	90.0263	56.2747	0.472213	0.625092
LOC_Os03g12150	AP13ITG58385_at	AP13ISTG58385	153.336	49.3307	48.05	43.4958	0.321716	0.905221
LOC_Os03g12140	AP13ITG70179_at	AP13ISTG70179	122.86	43.8864	1675.43	1525.44	0.357208	0.910478
LOC_Os03g11900	AP13CTG27562_s_at	AP13CTG27562	572.725	210.92	248.175	286.197	0.368275	1.15321
LOC_Os03g11140	KanlowSLT52008_at	KanlSGLT52008	496.303	170.109	170.893	65.4453	0.342751	0.382961
LOC_Os03g11010	KanlowSLT48056_at	KanlSGLT48056	251.117	92.2009	120.91	89.0194	0.367163	0.736248
LOC_Os03g10880	KanlowCTG42760_s_at	KanlCTG42760	280.247	71.1507	81.5797	73.3367	0.253886	0.898958
LOC_Os03g10880	AP13ITG55120_s_at	AP13ISTG55120	278.211	55.4861	76.5061	63.1735	0.199439	0.825732
LOC_Os03g10390	AP13ITG51009_at	AP13ISTG51009	117.535	32.3744	17.9569	13.8365	0.275445	0.770542
LOC_Os03g10350	KanlowCTG37968_at	KanlCTG37968	172.062	64.9184	102.453	110.517	0.377297	1.07871
LOC_Os03g10100	AP13ITG76471_s_at	AP13ISTG76471	363.472	95.3445	316.269	521.654	0.262316	1.6494
LOC_Os03g10030	AP13ITG37781_at	AP13ISTG37781	72.047	26.7065	429.485	503.715	0.370682	1.17283
LOC_Os03g09970	AP13CTG01912_s_at	AP13CTG01912	176.137	84.3793	568.113	1291.66	0.479055	2.27359
LOC_Os03g09100	KanlowCTG15399_s_at	KanlCTG15399	224.497	99.0656	63.3753	53.1224	0.441277	0.838218
LOC_Os03g09020	AP13ITG56240_at	AP13ISTG56240	130.244	49.351	607.383	917.056	0.378911	1.50985
LOC_Os03g08960	AP13CTG58935RC_at	AP13CTG58935-RC	161.457	76.9052	46.634	41.707	0.476319	0.894347
LOC_Os03g08770	AlamoCTG03173_at	AlamCTG03173	24.5699	10.8026	13.5743	8.78991	0.43967	0.647541
LOC_Os03g08624	AP13CTG08227_s_at	AP13CTG08227	509.062	102.256	283.11	322.174	0.200872	1.13798
LOC_Os03g08360	KanlowCTG13283_s_at	KanlCTG13283	601.66	224.233	3099.42	3373.51	0.37269	1.08843
LOC_Os03g08360	AP13ITG70368_at	AP13ISTG70368	393.525	84.2418	3294.97	4451.69	0.21407	1.35106
LOC_Os03g08320	KanlowCTG02718_at	KanlCTG02718	611.021	284.111	732.001	694.648	0.464978	0.948972
LOC_Os03g08320	AP13ITG39562_s_at	AP13ISTG39562	430.798	143.026	864.073	1300.64	0.332004	1.50525
LOC_Os03g08070	KanlowCTG22538_s_at	KanlCTG22538	211.603	103.749	161.037	104.345	0.490298	0.647957
LOC_Os03g08050	OTHSWCTG11990_x_at	OthsCTG11990	36.5044	16.179	53.8187	71.3553	0.443206	1.32585
LOC_Os03g08050	KanlowCTG15033_at	KanlCTG15033	157.681	52.0853	50.8068	3630.24	0.330321	71.4519
LOC_Os03g08050	KanlowCTG11199_at	KanlCTG11199	637.397	188.552	264.125	215.093	0.295815	0.814361
LOC_Os03g07880	OTHSWCTG18055_s_at	OthsCTG18055	602.87	208.67	189.618	105.893	0.346127	0.558456
LOC_Os03g07880	OTHSWCTG18055_at	OthsCTG18055	111.622	15.1049	31.5502	11.6806	0.135322	0.370224
LOC_Os03g07540	KanlowCTG30657_s_at	KanlCTG30657	62.9262	23.0365	870.208	696.997	0.366088	0.800954
LOC_Os03g07530	KanlowCTG09702_s_at	KanlCTG09702	789.617	367.101	236.387	253.695	0.464911	1.07322
LOC_Os03g07100	AP13ITG69392_at	AP13ISTG69392	114.698	51.3288	1565.93	1951.05	0.447513	1.24594
LOC_Os03g06940	KanlowCTG01654_at	KanlCTG01654	109.203	48.1725	1393.99	1102.79	0.441129	0.791104
LOC_Os03g06920	AP13CTG30617_s_at	AP13CTG30617	22.4236	9.31876	24.1673	11.5068	0.415578	0.476131
LOC_Os03g06920	AP13CTG30617_at	AP13CTG30617	25.2982	10.9847	21.1446	10.4177	0.434208	0.492687
LOC_Os03g06610	AP13CTG23906_at	AP13CTG23906	154.925	61.8734	588.19	600.506	0.399377	1.02094
LOC_Os03g06520	AP13CTG13347_s_at	AP13CTG13347	1108.97	400.858	372.36	342.715	0.361468	0.920387
LOC_Os03g05920	AP13ITG60317_at	AP13ISTG60317	330.571	128.077	219.983	151.225	0.387441	0.687441
LOC_Os03g05920	AP13CTG24619_at	AP13CTG24619	126.25	46.9419	61.4652	92.6238	0.371818	1.50693
LOC_Os03g05620	KanlowCTG14963_s_at	KanlCTG14963	411.871	140.285	229.934	194.128	0.340604	0.844277
LOC_Os03g05430	AP13CTG15467_at	AP13CTG15467	145.065	24.5581	121.575	48.3424	0.16929	0.397635
LOC_Os03g05400	AP13ITG71150_at	AP13ISTG71150	318.464	22.6361	188.747	98.3313	0.0710791	0.520968
LOC_Os03g05340	KanlowCTG14621_at	KanlCTG14621	165.437	75.3768	35.7953	33.3867	0.455622	0.932711
LOC_Os03g05330	AlamoCTG01172_at	AlamCTG01172	80.3097	10.2319	86.044	11.8796	0.127406	0.138064
LOC_Os03g05310	OTHSWCTG22127_s_at	OthsCTG22127	1453.4	628.471	1924.33	1692.82	0.432414	0.879697
LOC_Os03g05310	AP13CTG11521_s_at	AP13CTG11521	1612.88	603.622	2336.51	1849.35	0.374251	0.791503
LOC_Os03g05290	KanlowCTG00274_at	KanlCTG00274	603.622	214.526	171.271	88.647	0.355398	0.517583
LOC_Os03g04970	KanlowCTG41334_s_at	KanlCTG41334	84.8888	38.7387	111.473	64.309	0.456346	0.5769
LOC_Os03g04660	KanlowCTG20172_at	KanlCTG20172	152.792	74.3605	160.558	81.3487	0.486678	0.506663
LOC_Os03g04620	KanlowCTG16329_s_at	KanlCTG16329	75.9776	22.8751	164.673	143.026	0.301076	0.868547
LOC_Os03g04580	AP13ITG70023_at	AP13ISTG70023	141.047	67.9529	185.466	141.074	0.481774	0.760649
LOC_Os03g04410	AP13CTG13241_s_at	AP13CTG13241	181.736	87.4287	109.939	53.1389	0.481075	0.483351
LOC_Os03g04169	AP13CTG01183_at	AP13CTG01183	598.446	293.558	929.501	648.316	0.490534	0.697489
LOC_Os03g04020	KanlowCTG38433_at	KanlCTG38433	68.7866	26.3548	18.6362	18.9671	0.383138	1.01775
LOC_Os03g03510	AP13CTG08138_s_at	AP13CTG08138	685.085	188.878	78.6268	68.8294	0.275699	0.875394
LOC_Os03g03420	KanlowCTG36734_s_at	KanlCTG36734	26.2037	11.7228	12.671	11.4785	0.447373	0.905887
LOC_Os03g03400	AP13CTG11590_s_at	AP13CTG11590	170.072	84.8562	321.803	226.319	0.498944	0.703285
LOC_Os03g03164	AP13CTG28866RC_at	AP13CTG28866-RC	144.96	58.6876	28.9543	22.2262	0.404853	0.767631
LOC_Os03g03150	AP13CTG44086_s_at	AP13CTG44086	465.052	221.327	260.739	128.893	0.475919	0.494338
LOC_Os03g02690	KanlowCTG08064_s_at	KanlCTG08064	166.116	78.0746	279.212	146.917	0.47	0.526183
LOC_Os03g02530	AP13ITG40170_s_at	AP13ISTG40170	132.514	53.9023	66.5545	125.378	0.406767	1.88384
LOC_Os03g02410	AP13CTG13620_at	AP13CTG13620	36.1715	12.4564	19.3096	15.8899	0.344371	0.822899
LOC_Os03g02050	KanlowCTG22620_s_at	KanlCTG22620	445.357	108.009	736.774	535.676	0.242523	0.727056
LOC_Os03g02050	KanlowCTG03991_s_at	KanlCTG03991	1057.07	262.139	1894.37	1458.23	0.247988	0.769769
LOC_Os03g02050	AP13CTG22875_at	AP13CTG22875	444.246	73.0159	1413.45	850.529	0.164359	0.601738
LOC_Os03g02040	KanlowCTG12613_at	KanlCTG12613	173.22	79.9239	37.3355	37.7427	0.4614	1.01091
LOC_Os03g01790	KanlowCTG24066_s_at	KanlCTG24066	253.427	121.282	136.95	77.1884	0.478567	0.563626
LOC_Os03g01770	OTHSWCTG01200_at	OthsCTG01200	83.0022	27.5736	126.241	122.786	0.332203	0.972632
LOC_Os03g01770	OTHSWCTG01200_s_at	OthsCTG01200	363.298	114.607	456.802	424.612	0.315464	0.929531
LOC_Os02g58580	KanlowCTG16381_s_at	KanlCTG16381	317.64	127.687	124.951	106.902	0.401986	0.855549
LOC_Os02g58170	KanlowCTG15149_s_at	KanlCTG15149	115.404	30.8458	453.646	425.265	0.267285	0.937436
LOC_Os02g58030	KanlowCTG44479_at	KanlCTG44479	396.415	179.786	289.031	146.442	0.453531	0.506668
LOC_Os02g58030	KanlowCTG42933_at	KanlCTG42933	79.9158	32.6034	47.8639	29.9623	0.407971	0.62599
LOC_Os02g57480	AP13CTG55507_at	AP13CTG55507	76.3776	16.0188	54.7663	116.165	0.209732	2.12111
LOC_Os02g57350	AP13ITG54566_at	AP13ISTG54566	2329.89	841.05	526.597	1035.75	0.360982	1.96688
LOC_Os02g57290	AP13CTG29880_at	AP13CTG29880	221.522	94.6276	192.015	91.4825	0.42717	0.476433
LOC_Os02g57280	KanlowCTG17200_s_at	KanlCTG17200	2264.66	829.71	1888.21	2273.27	0.366373	1.20393
LOC_Os02g57260	OTHSWCTG07462_at	OthsCTG07462	541.31	228.346	281.194	183.829	0.421839	0.653742
LOC_Os02g57200	KanlowCTG40761_at	KanlCTG40761	32.0377	8.84945	25.6564	19.2184	0.27622	0.749068
LOC_Os02g57140	AP13CTG06451_s_at	AP13CTG06451	62.6844	30.1338	503.57	530.68	0.480722	1.05384
LOC_Os02g57110	AP13CTG28880_s_at	AP13CTG28880	362.352	38.8776	3009.74	2829.76	0.107292	0.9402
LOC_Os02g57110	AP13CTG28881_at	AP13CTG28881	146.533	31.2933	2797.92	1328.16	0.213559	0.474697
LOC_Os02g57090	KanlowCTG43774_at	KanlCTG43774	35.5096	15.0449	316.269	289.225	0.423684	0.91449
LOC_Os02g57010	AP13ITG69621_at	AP13ISTG69621	122.125	49.5411	237.212	200.506	0.405658	0.84526
LOC_Os02g56920	AP13ITG40386_s_at	AP13ISTG40386	149.612	59.7638	792.829	915.099	0.39946	1.15422
LOC_Os02g56860	AP13CTG30712_s_at	AP13CTG30712	209.886	58.7122	502.234	439.754	0.279733	0.875596
LOC_Os02g56565	AP13CTG15704_at	AP13CTG15704	351.091	144.758	185.107	122.147	0.41231	0.659872
LOC_Os02g56160	AP13ITG75254_s_at	AP13ISTG75254	159.786	20.9744	245.578	40.4924	0.131266	0.164886
LOC_Os02g56140	KanlowCTG36893_at	KanlCTG36893	49.8713	22.717	220.663	183.546	0.455513	0.831794
LOC_Os02g56140	KanlowCTG31654_at	KanlCTG31654	167.013	42.2101	231.589	179.277	0.252735	0.774117
LOC_Os02g56120	AP13ITG58227_at	AP13ISTG58227	48.8591	24.0004	12.0321	15.9139	0.491216	1.32262
LOC_Os02g55910	AP13CTG28367_s_at	AP13CTG28367	141.725	69.8209	93.0806	58.286	0.492651	0.626189
LOC_Os02g55890	AP13ITG74019_at	AP13ISTG74019	823.188	154.714	444.396	548.748	0.187945	1.23482
LOC_Os02g55890	AP13ITG58786_at	AP13ISTG58786	3354.07	1239.22	1156.23	1618.04	0.369467	1.39941
LOC_Os02g55880	AP13ITG36778_s_at	AP13ISTG36778	274.539	135.35	50.4122	31.8164	0.49301	0.631124
LOC_Os02g55870	AP13ITG48849_s_at	AP13ISTG48849	57.7479	26.7286	333.216	324.104	0.462849	0.972655
LOC_Os02g55870	KanlowCTG42320_at	KanlCTG42320	63.1325	17.1064	276.063	414.457	0.27096	1.50131
LOC_Os02g55610	AP13ITG58296_at	AP13ISTG58296	1010	498.14	1536.94	1120.23	0.493209	0.728868
LOC_Os02g55530	AP13CTG19707_at	AP13CTG19707	83.4173	35.0208	108.061	98.4191	0.419826	0.910774
LOC_Os02g55530	AlamoCTG05642_s_at	AlamCTG05642	792.372	168.962	666.543	481.972	0.213236	0.723092
LOC_Os02g54890	KanlowCTG22597_at	KanlCTG22597	57.6856	25.2508	75.4485	52.498	0.437731	0.695812
LOC_Os02g54580	AlamoCTG07995_at	AlamCTG07995	186.18	68.8354	70.5287	60.0514	0.369725	0.851446
LOC_Os02g54280	AP13CTG30681_s_at	AP13CTG30681	143.016	26.2531	62.9855	48.1783	0.183567	0.764911
LOC_Os02g54080	AP13CTG15793_s_at	AP13CTG15793	37.6631	11.9232	20.6062	13.4079	0.316576	0.650671
LOC_Os02g53810	AlamoCTG10939_at	AlamCTG10939	93.3009	25.0994	50.5675	30.1838	0.269015	0.596901
LOC_Os02g53720	KanlowCTG44814_s_at	KanlCTG44814	129.042	56.0568	1287.95	1300.7	0.434407	1.0099
LOC_Os02g53680	AP13CTG09551_at	AP13CTG09551	76.3306	22.2452	76.24	29.8483	0.291433	0.391505
LOC_Os02g53180	AP13CTG45278_s_at	AP13CTG45278	3483.84	1646.3	3169.41	2826.91	0.472552	0.891934
LOC_Os02g52900	AP13CTG13683_at	AP13CTG13683	75.3212	31.8164	46.2102	24.4849	0.422409	0.529859
LOC_Os02g52900	AP13CTG19854_at	AP13CTG19854	97.603	46.3401	89.61	49.7301	0.474781	0.554962
LOC_Os02g52314	KanlowCTG22508_at	KanlCTG22508	384.197	174.063	199.509	183.546	0.453056	0.919989
LOC_Os02g52290	AP13CTG38106_at	AP13CTG38106	954.667	353.618	768.578	657.13	0.37041	0.854994
LOC_Os02g52280	AP13CTG32003_s_at	AP13CTG32003	81.9382	27.0036	49.1045	17.3277	0.32956	0.352874
LOC_Os02g52280	AP13CTG20729_s_at	AP13CTG20729	420.525	120.285	560.615	111.126	0.286035	0.198221
LOC_Os02g51620	KanlowCTG29317_at	KanlCTG29317	107.505	27.2514	18.254	20.4115	0.25349	1.11819
LOC_Os02g51100	AP13CTG00531_s_at	AP13CTG00531	186.845	78.4287	215.275	167.159	0.419752	0.776492
LOC_Os02g51040	AP13CTG23988_at	AP13CTG23988	182.921	78.2057	2385.89	2601.41	0.427538	1.09033
LOC_Os02g50110	VS16ITG25228_s_at	VS16ISTG25228	137.664	63.0369	19.0314	15.8346	0.457904	0.832024
LOC_Os02g49590	AP13CTG12601_at	AP13CTG12601	52.5584	17.2681	22.5883	17.2312	0.32855	0.762837
LOC_Os02g49170	OTHSWCTG10816_at	OthsCTG10816	62.7286	26.8265	59.0335	22.0959	0.42766	0.374293
LOC_Os02g48360	AP13CTG00275_s_at	AP13CTG00275	87.6367	28.0768	2157.4	1839.47	0.320377	0.852635
LOC_Os02g47980	KanlowCTG18055_s_at	KanlCTG18055	1121.88	554.753	467.927	494.666	0.494487	1.05714
LOC_Os02g47650	KanlowCTG03193_at	KanlCTG03193	44.3738	15.1373	7.65726	9.28711	0.341131	1.21285
LOC_Os02g47510	AP13ITG73780RC_at	AP13ISTG73780-RC	107.8	18.7014	45.9141	25.2606	0.173482	0.550171
LOC_Os02g47130	AP13CTG18754_s_at	AP13CTG18754	42.1512	18.9869	700.018	513.781	0.450448	0.733954
LOC_Os02g46980	AP13ITG63543_at	AP13ISTG63543	62.2675	26.2828	151.116	126.951	0.422095	0.840086
LOC_Os02g46930	AP13CTG30135_at	AP13CTG30135	143.238	50.1722	41.3801	37.4065	0.350271	0.903972
LOC_Os02g46930	AP13CTG30135_s_at	AP13CTG30135	760.24	311.93	285.421	205.817	0.410304	0.721098
LOC_Os02g46130	AP13CTG15018_at	AP13CTG15018	545.599	250.118	442.739	230.233	0.458428	0.520019
LOC_Os02g45950	KanlowCTG44921_at	KanlCTG44921	57.8973	25.935	97.239	70.0954	0.447948	0.720857
LOC_Os02g45930	AP13CTG58898_at	AP13CTG58898	492.851	211.164	139.132	108.025	0.428453	0.776418
LOC_Os02g45930	KanlowCTG11498_s_at	KanlCTG11498	1017.32	495.34	528.377	405.123	0.486908	0.766731
LOC_Os02g45160	AP13ITG72437_at	AP13ISTG72437	34.8165	12.4325	10.2767	9.31988	0.357088	0.906893
LOC_Os02g44654	KanlowCTG22292RC_at	KanlCTG22292-RC	36.3839	6.80079	308.944	303.473	0.186917	0.982292
LOC_Os02g44654	KanlowCTG22292RC_s_at	KanlCTG22292-RC	65.8246	11.8254	546.267	523.562	0.17965	0.958436
LOC_Os02g44654	KanlowCTG09710RC_s_at	KanlCTG09710-RC	70.6592	12.4504	622.4	542.767	0.176204	0.872056
LOC_Os02g44320	AP13ITG66892_at	AP13ISTG66892	190.092	30.7857	4871.11	4643.08	0.161952	0.953187
LOC_Os02g44320	AP13ITG59124_s_at	AP13ISTG59124	75.3442	16.4502	2704.69	2759.4	0.218334	1.02023
LOC_Os02g44230	AP13ITG56710_s_at	AP13ISTG56710	103.023	44.7341	244.735	172.86	0.434213	0.706316
LOC_Os02g44200	AP13CTG03683_at	AP13CTG03683	98.9655	47.6692	27.3813	15.1716	0.481675	0.554087
LOC_Os02g44108	AP13ITG61224_at	AP13ISTG61224	25.687	9.75015	1197.18	1351.21	0.379575	1.12866
LOC_Os02g44108	AP13ITG40301_s_at	AP13ISTG40301	43.4207	13.045	273.505	232.414	0.300432	0.849762
LOC_Os02g43906	AlamoCTG03785_s_at	AlamCTG03785	2157.92	932.666	1226.34	528.377	0.432206	0.430858
LOC_Os02g42650	AP13ITG43349_at	AP13ISTG43349	45.7347	17.9041	734.344	290.046	0.391477	0.394973
LOC_Os02g42620	AP13CTG21388_at	AP13CTG21388	91.793	41.3016	29.1458	20.1468	0.449943	0.69124
LOC_Os02g42600	AP13CTG30906_at	AP13CTG30906	54.4711	26.5542	18.2574	13.3968	0.487491	0.733775
LOC_Os02g42600	AP13CTG09926_s_at	AP13CTG09926	632.994	282.115	199.509	148.892	0.445683	0.746293
LOC_Os02g42380	KanlowCTG29391_at	KanlCTG29391	46.0528	21.7815	823.267	699.48	0.472968	0.849639
LOC_Os02g42230	AP13CTG07835_at	AP13CTG07835	160.943	69.5307	296.196	198.164	0.43202	0.669031
LOC_Os02g42150	AP13ITG72176_at	AP13ISTG72176	452.042	225.282	229.264	192.671	0.498365	0.840388
LOC_Os02g41990	KanlowCTG42298_at	KanlCTG42298	129.837	43.6569	108.087	65.8009	0.336245	0.608777
LOC_Os02g41780	AP13ITG36452_s_at	AP13ISTG36452	48.44	17.1359	28.3733	10.668	0.353756	0.375987
LOC_Os02g41670	AP13ITG44895_s_at	AP13ISTG44895	56.6895	23.4817	361.569	429.052	0.414216	1.18664
LOC_Os02g40900	KanlowCTG15212_s_at	KanlCTG15212	493.207	176.069	304.042	179.2	0.356989	0.589392
LOC_Os02g40784	AP13CTG12889_s_at	AP13CTG12889	474.413	124.646	4167.82	5113.28	0.262738	1.22685
LOC_Os02g40664	KanlowCTG38452_s_at	KanlCTG38452	119.878	42.9798	319.479	353.363	0.358529	1.10606
LOC_Os02g40514	AlamoCTG09720_at	AlamCTG09720	65.472	22.8805	94.4643	14.5887	0.349471	0.154436
LOC_Os02g40490	AP13ITG63083_at	AP13ISTG63083	1073.51	535.753	1532.05	773.59	0.499065	0.504938
LOC_Os02g40440	AP13CTG28906_s_at	AP13CTG28906	728.516	135.952	2998.52	2586.79	0.186614	0.86269
LOC_Os02g40260	KanlowCTG42160_s_at	KanlCTG42160	119.849	53.6573	3685.14	1483.73	0.447706	0.402624
LOC_Os02g40180	OTHSWSLT24717_at	OthsSGLT24717	49.3653	20.1243	20.915	12.3853	0.407661	0.592173
LOC_Os02g40090	AP13CTG06695_at	AP13CTG06695	613.242	219.139	54.761	35.3025	0.357345	0.644664
LOC_Os02g39600	AP13ITG43123_s_at	AP13ISTG43123	138.194	48.05	158.142	85.7282	0.347699	0.542096
LOC_Os02g39360	KanlowCTG02945_s_at	KanlCTG02945	3386.14	1579.23	2530.52	2522.35	0.466382	0.996774
LOC_Os02g39040	AP13CTG03278_at	AP13CTG03278	205.094	86.527	164.472	106.245	0.42189	0.645975
LOC_Os02g38980	AP13CTG00262_s_at	AP13CTG00262	510.599	135.328	245.195	89.3687	0.265037	0.364481
LOC_Os02g38410	AP13ITG59625_at	AP13ISTG59625	178.544	85.7014	251.724	181.649	0.480001	0.721618
LOC_Os02g38410	AP13ITG59625_s_at	AP13ISTG59625	229.214	101.492	405.927	286.087	0.44278	0.704775
LOC_Os02g38020	AP13CTG12056_s_at	AP13CTG12056	124.646	57.349	372.36	302.334	0.460094	0.81194
LOC_Os02g37490	AlamoCTG10334_at	AlamCTG10334	47.0272	16.0556	1386.07	1547.35	0.341412	1.11636
LOC_Os02g37420	AP13ITG56661_s_at	AP13ISTG56661	341.425	144.703	218.61	198.131	0.42382	0.906322
LOC_Os02g37290	AP13ITG41464_at	AP13ISTG41464	121.972	29.2928	15.0919	12.8623	0.24016	0.852265
LOC_Os02g37050	KanlowCTG19820_at	KanlCTG19820	186.263	86.2416	78.9144	60.3821	0.463009	0.765159
LOC_Os02g37040	AP13ITG59984_at	AP13ISTG59984	150.754	69.7902	86.7973	165.425	0.462942	1.90588
LOC_Os02g36880	AP13CTG23466_at	AP13CTG23466	364.084	167.44	158.294	201.581	0.459895	1.27346
LOC_Os02g36550	AP13ITG38578_at	AP13ISTG38578	323.349	117.394	258.4	202.328	0.363057	0.783004
LOC_Os02g35640	AP13CTG32182_at	AP13CTG32182	76.4046	19.6191	66.335	18.2023	0.256779	0.2744
LOC_Os02g35590	AlamoCTG05853_s_at	AlamCTG05853	836.846	287.158	4956.17	5732.74	0.343144	1.15669
LOC_Os02g34810	AP13ITG48297_at	AP13ISTG48297	22.0916	9.78112	12.7735	9.44044	0.442753	0.739067
LOC_Os02g34710	KanlowCTG31678_s_at	KanlCTG31678	144.007	58.7055	164.897	128.538	0.407656	0.779501
LOC_Os02g33500	KanlowCTG45873_s_at	KanlCTG45873	1239.64	291.237	9843.86	10408.1	0.234937	1.05732
LOC_Os02g33110	KanlowCTG35859_at	KanlCTG35859	83.5996	39.5355	288.014	193.342	0.472915	0.671294
LOC_Os02g32660	AlamoCTG07358_s_at	AlamCTG07358	198.26	94.3895	199.471	100.109	0.47609	0.501871
LOC_Os02g32660	AlamoCTG07358_at	AlamCTG07358	69.4607	5.66578	63.6155	5.51539	0.0815681	0.0866988
LOC_Os02g32650	AP13CTG22989_at	AP13CTG22989	51.6263	17.213	224.416	151.258	0.333415	0.674005
LOC_Os02g32170	AlamoCTG05385_at	AlamCTG05385	284.159	125.263	107.728	29.1775	0.44082	0.270844
LOC_Os02g32170	AlamoCTG05385_s_at	AlamCTG05385	352.147	125.559	128.607	27.6882	0.356551	0.215293
LOC_Os02g31030	AP13ITG56317_at	AP13ISTG56317	238.879	58.1729	401.948	857.185	0.243524	2.13258
LOC_Os02g30480	AP13CTG15899_at	AP13CTG15899	266.659	114.607	61.8734	48.1864	0.429789	0.77879
LOC_Os02g30480	KanlowCTG25563_at	KanlCTG25563	170.219	43.7984	47.8639	14.8268	0.257306	0.309771
LOC_Os02g30480	AP13ITG42050_s_at	AP13ISTG42050	62.6021	28.3331	66.027	27.4767	0.45259	0.416144
LOC_Os02g30460	AP13CTG09773_s_at	AP13CTG09773	148.571	72.1439	83.8732	51.116	0.485585	0.609443
LOC_Os02g29960	AP13ITG74032_at	AP13ISTG74032	2856.71	661.939	1365.31	972.272	0.231714	0.712128
LOC_Os02g28720	KanlowCTG20046_s_at	KanlCTG20046	54.3828	8.71916	11.8841	6.69371	0.160329	0.563249
LOC_Os02g28720	AP13ITG74149_at	AP13ISTG74149	24.7182	12.268	10.5989	9.52189	0.496315	0.89838
LOC_Os02g27760	AP13CTG29639_s_at	AP13CTG29639	295.658	133.964	545.429	418.806	0.453105	0.767847
LOC_Os02g27360	AP13ITG54145_at	AP13ISTG54145	66.3143	25.2965	68.5935	21.5889	0.381464	0.314737
LOC_Os02g27000	AlamoCTG11130_s_at	AlamCTG11130	98.6461	39.5075	158.399	179.604	0.400498	1.13387
LOC_Os02g27000	KanlowCTG45036_s_at	KanlCTG45036	367.101	95.0186	297.185	224.497	0.258835	0.755413
LOC_Os02g26850	AP13CTG11542_at	AP13CTG11542	1972.55	296.689	2730.61	201.09	0.150408	0.0736428
LOC_Os02g26814	AP13ITG61115_s_at	AP13ISTG61115	222.251	94.3257	141.047	108.014	0.42441	0.765802
LOC_Os02g26014	KanlowCTG09237_s_at	KanlCTG09237	34.2374	16.8536	2020.24	1332.86	0.492257	0.659754
LOC_Os02g24090	OTHSWCTG19758_at	OthsCTG19758	120.262	56.4196	72.2542	54.998	0.46914	0.761174
LOC_Os02g21970	AP13CTG04735_at	AP13CTG04735	525.106	215.688	289.225	232.347	0.410753	0.803344
LOC_Os02g21460	AP13CTG26817_at	AP13CTG26817	98.8267	39.766	185.555	281.109	0.402381	1.51496
LOC_Os02g20170	AP13CTG03594_at	AP13CTG03594	177.938	26.2659	110.323	144.89	0.147613	1.31333
LOC_Os02g19820	AP13ITG61404_s_at	AP13ISTG61404	528.225	208.125	1930.83	2062.69	0.394008	1.06829
LOC_Os02g19440	AlamoCTG11154_at	AlamCTG11154	88.0596	41.6199	69.8264	83.3179	0.472634	1.19321
LOC_Os02g19200	AP13CTG19847_at	AP13CTG19847	552.777	100.094	23.8382	22.3542	0.181075	0.937749
LOC_Os02g18510	AP13CTG32642_s_at	AP13CTG32642	284.159	133.397	163.336	101.831	0.469444	0.623446
LOC_Os02g18510	AP13CTG04656_at	AP13CTG04656	226.319	111.078	82.808	59.4171	0.4908	0.717528
LOC_Os02g18070	KanlowCTG44715_at	KanlCTG44715	749.612	205.197	787.05	435.104	0.273738	0.552829
LOC_Os02g17870	AP13CTG18075_at	AP13CTG18075	399.891	195.436	160.339	122.798	0.488724	0.765861
LOC_Os02g17640	KanlowCTG33477_s_at	KanlCTG33477	3072.98	1265.68	201.61	26.5305	0.411875	0.131593
LOC_Os02g17520	AP13CTG28284_at	AP13CTG28284	93.0632	43.7175	89.9903	51.7065	0.469761	0.574579
LOC_Os02g15360	AP13CTG29495_s_at	AP13CTG29495	103.29	44.5225	87.2125	45.4696	0.431045	0.521365
LOC_Os02g15360	AP13CTG30709_s_at	AP13CTG30709	41.7945	12.6913	38.1888	15.7744	0.303661	0.413064
LOC_Os02g15120	AP13CTG28798_x_at	AP13CTG28798	295.175	139.186	80.2288	59.3031	0.471537	0.739174
LOC_Os02g14770	KanlowCTG46162_s_at	KanlCTG46162	162.646	26.1276	11.5308	13.6545	0.160641	1.18417
LOC_Os02g14430	KanlowCTG18961_at	KanlCTG18961	128.028	39.4588	631.088	870.208	0.308205	1.3789
LOC_Os02g14130	AP13CTG01259_at	AP13CTG01259	73.2839	36.3095	57.0828	48.8415	0.495463	0.855625
LOC_Os02g14000	AP13CTG31490_at	AP13CTG31490	88.0368	35.5753	126.347	81.6032	0.404096	0.645866
LOC_Os02g13890	AlamoCTG07603_s_at	AlamCTG07603	594.57	250.786	351.024	189.554	0.421794	0.540003
LOC_Os02g13890	AlamoCTG11912_s_at	AlamCTG11912	598.418	239.063	299.223	167.746	0.399492	0.560607
LOC_Os02g13870	AP13ITG43484RC_at	AP13ISTG43484-RC	16.3927	6.9437	63.6634	61.2171	0.423584	0.961574
LOC_Os02g13710	AP13ITG74494_at	AP13ISTG74494	395.852	196.38	37.0363	27.2843	0.496094	0.736692
LOC_Os02g13660	AP13ITG76758_s_at	AP13ISTG76758	32.5752	13.8418	932.576	975.712	0.424919	1.04625
LOC_Os02g13630	AP13CTG21302_x_at	AP13CTG21302	138.378	49.5221	370.779	256.154	0.357874	0.690853
LOC_Os02g13400	KanlowCTG45988_s_at	KanlCTG45988	197.926	98.0344	77.7383	92.1587	0.495308	1.1855
LOC_Os02g13370	OTHSWSLT23761_s_at	OthsSGLT23761	72.3792	13.7489	9.95695	8.99332	0.189957	0.903221
LOC_Os02g13310	AP13ITG63206_at	AP13ISTG63206	213.106	43.1506	229.99	194.743	0.202484	0.846745
LOC_Os02g13140	AP13ITG40468_at	AP13ISTG40468	483.985	105.106	867.4	492.851	0.217168	0.568193
LOC_Os02g12740	AP13CTG12998_at	AP13CTG12998	47.0476	18.5269	48.1725	32.2132	0.393792	0.668704
LOC_Os02g12480	KanlowCTG24828_at	KanlCTG24828	347.967	123.272	85.7282	86.3245	0.354264	1.00696
LOC_Os02g12480	AP13CTG08200_s_at	AP13CTG08200	522.079	138.028	156.558	104.058	0.264381	0.664662
LOC_Os02g12480	AP13CTG32352_at	AP13CTG32352	74.2855	33.2677	96.2107	118.192	0.447835	1.22847
LOC_Os02g12480	AP13CTG32352_s_at	AP13CTG32352	99.6036	33.3316	153.458	134.87	0.334642	0.878873
LOC_Os02g11830	KanlowCTG25925_at	KanlCTG25925	176.474	31.6353	10.4993	9.9888	0.179263	0.951381
LOC_Os02g11720	KanlowCTG30195_at	KanlCTG30195	174.857	85.0441	79.6402	52.8957	0.486363	0.664183
LOC_Os02g11640	AP13ITG69899_at	AP13ISTG69899	29.7343	13.9328	254.329	192.145	0.468575	0.755495
LOC_Os02g11030	AP13CTG09197_s_at	AP13CTG09197	433.534	164.065	432.057	602.609	0.378437	1.39474
LOC_Os02g10990	AlamoCTG00720_at	AlamCTG00720	242.747	52.3606	134.035	58.5358	0.2157	0.436721
LOC_Os02g10390	OTHSWSLT23999_s_at	OthsSGLT23999	2249.99	855.212	5481.34	3528.91	0.380096	0.643805
LOC_Os02g10390	KanlowCTG00148_at	KanlCTG00148	1351.21	452.335	3236.32	2146.1	0.334763	0.66313
LOC_Os02g09930	KanlowCTG44084_s_at	KanlCTG44084	16.3378	6.43116	131.182	136.567	0.393637	1.04105
LOC_Os02g09930	AP13CTG01642_s_at	AP13CTG01642	594.712	295.089	3114.98	2977.81	0.496189	0.955963
LOC_Os02g09930	AP13CTG14018_at	AP13CTG14018	188.38	81.6973	1022.43	1117.49	0.433683	1.09298
LOC_Os02g09720	AP13ITG46565_s_at	AP13ISTG46565	153.855	66.2713	100.436	75.6998	0.430739	0.753708
LOC_Os02g09490	KanlowCTG21634_s_at	KanlCTG21634	535.985	166.576	1865.06	2098.41	0.310785	1.12511
LOC_Os02g09400	AP13ITG76082_at	AP13ISTG76082	23.859	9.32051	13.4582	10.0716	0.390649	0.748362
LOC_Os02g08420	AP13ITG69021_s_at	AP13ISTG69021	775.039	371.912	223.123	215.399	0.479862	0.96538
LOC_Os02g08230	AP13CTG25515_s_at	AP13CTG25515	61.8374	18.9671	559.819	793.039	0.306725	1.4166
LOC_Os02g08180	OTHSWSLT30261_at	OthsSGLT30261	2846.98	93.5798	2105.63	1201.44	0.0328699	0.570587
LOC_Os02g08030	AP13CTG18750_at	AP13CTG18750	120.886	48.3636	177.362	148.113	0.400076	0.835088
LOC_Os02g06840	AP13ITG70919_at	AP13ISTG70919	49.6411	13.2996	49.8018	38.3081	0.267915	0.769212
LOC_Os02g06360	AP13CTG14141_s_at	AP13CTG14141	290.36	123.213	3385.65	1999.5	0.424345	0.590581
LOC_Os02g05330	KanlowCTG44432_at	KanlCTG44432	68.3763	30.7437	26.602	13.6048	0.449624	0.511422
LOC_Os02g04730	KanlowCTG40254_s_at	KanlCTG40254	378.744	84.5215	474.823	165.437	0.223163	0.348418
LOC_Os02g04710	AP13CTG27951_at	AP13CTG27951	37.7618	17.9048	27.5857	23.1034	0.474152	0.837514
LOC_Os02g04640	AP13CTG62446_s_at	AP13CTG62446	335.751	143.75	139.507	96.9775	0.428145	0.695147
LOC_Os02g04020	OTHSWCTG21045_at	OthsCTG21045	24.9249	11.4436	11.3645	7.83273	0.459121	0.689228
LOC_Os02g03210	AP13ITG71243_at	AP13ISTG71243	105.837	39.1131	26.2744	25.9946	0.369559	0.989349
LOC_Os02g03100	AP13CTG30425_at	AP13CTG30425	55.699	17.3894	15.5199	12.0431	0.312204	0.77598
LOC_Os02g02890	VS16ITG03466_at	VS16ISTG03466	161.737	75.3768	63.3475	34.7764	0.466046	0.548977
LOC_Os02g02540	KanlowCTG45599_at	KanlCTG45599	396.186	187.348	219.328	207.218	0.472879	0.944786
LOC_Os02g02524	AP13CTG32677_at	AP13CTG32677	33.5811	13.9961	20.1939	16.2374	0.416783	0.804073
LOC_Os02g02350	OTHSWCTG21604_s_at	OthsCTG21604	411.594	166.004	239.699	181.305	0.403321	0.756387
LOC_Os02g02350	AP13CTG02388_at	AP13CTG02388	47.7972	21.6317	38.2145	28.4867	0.452573	0.745442
LOC_Os02g02120	AlamoCTG10624_s_at	AlamCTG10624	277.323	111.455	141.166	130.69	0.401894	0.925787
LOC_Os02g02120	AlamoCTG10624_at	AlamCTG10624	61.1809	30.1569	34.9719	35.3336	0.492913	1.01034
LOC_Os02g01950	OTHSWCTG14976_at	OthsCTG14976	253.39	125.61	125.802	70.9202	0.495717	0.563746
LOC_Os02g01760	AlamoCTG04707_s_at	AlamCTG04707	237.258	97.0711	932.532	744.505	0.409137	0.79837
LOC_Os02g01590	AP13ITG61323_s_at	AP13ISTG61323	414.736	99.7546	284.111	177.447	0.240526	0.62457
LOC_Os02g01560	KanlowCTG00271_at	KanlCTG00271	362.465	178.218	651.573	409.438	0.491685	0.628384
LOC_Os02g01380	AP13ITG36476_s_at	AP13ISTG36476	41.7938	13.2919	163.148	173.796	0.318035	1.06527
LOC_Os02g01310	KanlowCTG28934_at	KanlCTG28934	75.8866	31.4877	16.7954	15.6504	0.414931	0.931826
LOC_Os02g01310	AP13ITG60963_at	AP13ISTG60963	94.7496	39.4294	15.6467	17.9599	0.416143	1.14784
LOC_Os02g01190	KanlowCTG05140_s_at	KanlCTG05140	272.505	110.026	155.036	145.513	0.403757	0.938576
LOC_Os02g01140	KanlowCTG17474_at	KanlCTG17474	186.149	18.8397	2312.13	1652.36	0.101208	0.714647
LOC_Os02g01100	KanlowCTG44133_at	KanlCTG44133	46.3664	16.1361	49.8773	33.8254	0.348012	0.678172
LOC_Os02g01010	OTHSWCTG11279_at	OthsCTG11279	50.8234	11.8048	7.26643	7.55537	0.232272	1.03976
LOC_Os01g74650	KanlowCTG41591_at	KanlCTG41591	80.4254	31.2457	32.4498	19.91	0.388506	0.613564
LOC_Os01g74650	KanlowCTG41591_s_at	KanlCTG41591	200.91	91.5485	89.2829	41.097	0.455668	0.460301
LOC_Os01g74650	AP13CTG30943_s_at	AP13CTG30943	841.05	388.359	380.485	198.107	0.461755	0.52067
LOC_Os01g74152	AP13CTG08072_s_at	AP13CTG08072	843.377	262.982	792.429	553.893	0.311819	0.698981
LOC_Os01g73790	KanlowCTG43138_at	KanlCTG43138	53.4572	10.7345	16.4407	8.42216	0.200806	0.512274
LOC_Os01g73760	OTHSWCTG20601_x_at	OthsCTG20601	103.567	47.5333	48.0085	42.6658	0.458963	0.888715
LOC_Os01g73670	AP13ITG48619_at	AP13ISTG48619	36.2521	10.2674	19.361	16.346	0.283222	0.844277
LOC_Os01g73234	AP13ITG41862_at	AP13ISTG41862	226.921	50.7531	393.325	75.0611	0.22366	0.190837
LOC_Os01g73140	AP13ITG54233_at	AP13ISTG54233	365.825	77.6468	331.993	239.86	0.212251	0.722485
LOC_Os01g73110	AlamoCTG08164_at	AlamCTG08164	494.666	167.795	327.422	211.164	0.339208	0.644927
LOC_Os01g72880	AP13CTG32206_at	AP13CTG32206	111.872	42.2909	213.803	59.5079	0.37803	0.27833
LOC_Os01g72790	AP13ITG59885_s_at	AP13ISTG59885	72.069	30.1001	47.7524	41.7998	0.417657	0.875344
LOC_Os01g72790	KanlowCTG44815_s_at	KanlCTG44815	354.622	61.0406	179.786	140.751	0.172129	0.78288
LOC_Os01g72740	AP13CTG50178_at	AP13CTG50178	67.8459	29.0518	92.2915	36.642	0.428202	0.397024
LOC_Os01g72630	AP13ITG39956_at	AP13ISTG39956	49.2095	12.8669	25.3875	17.7569	0.261471	0.699436
LOC_Os01g72490	KanlowCTG20311_s_at	KanlCTG20311	1230.54	486.206	837.713	724.095	0.395116	0.864371
LOC_Os01g72490	AP13ITG74024RC_at	AP13ISTG74024-RC	487.351	159.832	251.599	212.326	0.32796	0.843906
LOC_Os01g72470	AP13ITG61319_at	AP13ISTG61319	147.09	37.3355	234.754	206.505	0.253827	0.879665
LOC_Os01g72460	AP13ITG35862_s_at	AP13ISTG35862	36.1122	15.7812	38.4071	20.3284	0.437006	0.529287
LOC_Os01g72350	AP13CTG16231_at	AP13CTG16231	57.1249	22.7781	53.2866	37.8145	0.398743	0.709643
LOC_Os01g72230	AP13CTG03401_at	AP13CTG03401	200.873	86.2747	124.862	66.317	0.429499	0.531123
LOC_Os01g71810	KanlowCTG24512_s_at	KanlCTG24512	100.903	37.4119	192.034	483.056	0.37077	2.51548
LOC_Os01g71740	AP13ITG66875_at	AP13ISTG66875	911.246	424.732	240.321	269.345	0.4661	1.12077
LOC_Os01g71310	OTHSWCTG28881_at	OthsCTG28881	76.8544	31.7797	8.84717	8.54581	0.413506	0.965936
LOC_Os01g71280	AP13CTG18603_at	AP13CTG18603	170.226	59.0273	94.6814	43.2739	0.346759	0.457047
LOC_Os01g70810	AP13CTG30869_at	AP13CTG30869	216.015	88.4045	112.307	110.31	0.409253	0.98222
LOC_Os01g70525	AP13ITG60890_at	AP13ISTG60890	123.687	42.6907	60.4548	83.7201	0.34515	1.38484
LOC_Os01g70525	AP13ITG58373_at	AP13ISTG58373	2335.6	831.926	69.8264	75.6464	0.356194	1.08335
LOC_Os01g70490	KanlowCTG10065_at	KanlCTG10065	1252.74	432.161	419.427	446.407	0.344974	1.06433
LOC_Os01g70210	AP13CTG22655_at	AP13CTG22655	141.541	45.1592	301.119	241.354	0.319054	0.801525
LOC_Os01g70200	AP13ITG73878_at	AP13ISTG73878	117.155	30.5203	36.1288	28.1845	0.260512	0.780111
LOC_Os01g69290	AP13ITG62509_s_at	AP13ISTG62509	31.0541	14.9461	197.603	179.838	0.481293	0.910096
LOC_Os01g69190	AP13ITG43212_at	AP13ISTG43212	87.9204	23.1641	101.858	87.7348	0.263467	0.861349
LOC_Os01g69190	AP13ITG39352_s_at	AP13ISTG39352	29.5626	12.9574	23.2117	19.9288	0.438303	0.858565
LOC_Os01g68860	AP13CTG31242_at	AP13CTG31242	243.068	109.161	151.802	100.094	0.449096	0.659374
LOC_Os01g67950	AP13ITG71026_at	AP13ISTG71026	753.52	61.3944	1144.21	661.748	0.0814767	0.578344
LOC_Os01g67810	KanlowCTG33442_at	KanlCTG33442	119.05	47.3634	78.5249	57.5388	0.397845	0.732746
LOC_Os01g67480	KanlowCTG08412_at	KanlCTG08412	54.7742	15.0657	8.00725	8.73585	0.275051	1.09099
LOC_Os01g67340	OTHSWCTG27517_at	OthsCTG27517	423.877	66.9981	142.039	111.078	0.15806	0.782025
LOC_Os01g67310	AP13CTG09481_at	AP13CTG09481	137.73	49.5649	50.4475	20.4845	0.359869	0.406057
LOC_Os01g67054	AP13CTG11309_at	AP13CTG11309	187.407	47.5863	77.2014	50.7097	0.253919	0.65685
LOC_Os01g66940	KanlowCTG23469_at	KanlCTG23469	539.713	33.1013	417.62	166.588	0.0613314	0.398898
LOC_Os01g66830	OTHSWCTG22735_at	OthsCTG22735	106.665	35.9034	69.8633	50.0391	0.336598	0.716243
LOC_Os01g66820	AP13ITG68595_at	AP13ISTG68595	264.239	102.027	66.6648	61.6094	0.386115	0.924166
LOC_Os01g66730	AP13CTG12855_at	AP13CTG12855	289.934	41.0854	980.211	32.235	0.141706	0.0328857
LOC_Os01g66590	AP13CTG24781_at	AP13CTG24781	42.4527	16.5427	205.886	191.643	0.389675	0.930819
LOC_Os01g66000	AP13CTG15759_at	AP13CTG15759	943.721	444.631	1428.53	657.13	0.471146	0.460005
LOC_Os01g65890	AP13CTG15436_at	AP13CTG15436	487.798	211.786	87.5022	71.2697	0.434168	0.81449
LOC_Os01g65700	AP13CTG22260_at	AP13CTG22260	155.551	56.6885	359.849	448.995	0.364436	1.24773
LOC_Os01g65680	AP13CTG55482_at	AP13CTG55482	1747.25	719.145	982.381	930.103	0.411588	0.946785
LOC_Os01g65460	KanlowCTG20309_s_at	KanlCTG20309	90.564	36.8618	993.274	903.975	0.407025	0.910096
LOC_Os01g65460	KanlowCTG20625_at	KanlCTG20625	35.6291	15.4609	367.172	374.95	0.433941	1.02118
LOC_Os01g65460	AP13CTG29928_at	AP13CTG29928	163.242	41.1052	1491.16	1389.16	0.251805	0.9316
LOC_Os01g65070	AP13CTG18211_x_at	AP13CTG18211	726.63	333.432	806.324	481.775	0.458874	0.597496
LOC_Os01g65070	KanlowCTG20650_x_at	KanlCTG20650	244.866	118.067	244.97	150.645	0.48217	0.614952
LOC_Os01g64810	AP13CTG08944_s_at	AP13CTG08944	466.266	144.426	118.449	81.3136	0.309751	0.686484
LOC_Os01g64760	KanlowCTG02101_at	KanlCTG02101	2042.99	630.346	921.682	958.887	0.308541	1.04037
LOC_Os01g64720	AP13ITG42146_s_at	AP13ISTG42146	64.6724	25.9977	38.6786	34.3635	0.401991	0.888438
LOC_Os01g64020	AP13ITG42808_s_at	AP13ISTG42808	60.4996	16.2489	23.1384	18.0173	0.268579	0.778673
LOC_Os01g63990	AP13ITG70311_at	AP13ISTG70311	339.067	136.753	176.277	115.537	0.403321	0.655433
LOC_Os01g63854	AP13ITG66485_at	AP13ISTG66485	112.475	46.1932	197.461	211.583	0.410697	1.07152
LOC_Os01g63580	KanlowCTG41770_s_at	KanlCTG41770	166.576	64.7812	1050.56	1176.6	0.388899	1.11997
LOC_Os01g63310	AP13ITG44200_s_at	AP13ISTG44200	211.725	62.6102	1505.16	1423.97	0.295715	0.946058
LOC_Os01g63310	AP13ITG44199_s_at	AP13ISTG44199	166.576	82.8526	944.437	792.578	0.497387	0.839207
LOC_Os01g63260	AP13ITG73588_at	AP13ISTG73588	1897.7	886.052	1049.3	936.123	0.466909	0.892137
LOC_Os01g63210	AP13ITG58299_at	AP13ISTG58299	71.2937	15.9011	476.887	467.893	0.223036	0.981141
LOC_Os01g62890	AP13CTG09949_s_at	AP13CTG09949	306.915	98.36	173.65	102.232	0.320479	0.588726
LOC_Os01g62830	AP13ITG60314_at	AP13ISTG60314	15.0366	7.23798	13.9211	23.2837	0.481357	1.67254
LOC_Os01g62800	AP13CTG13453_at	AP13CTG13453	64.0554	15.3158	89.6946	54.4849	0.239103	0.607449
LOC_Os01g62720	AlamoCTG01997_at	AlamCTG01997	76.6946	12.1737	59.351	13.4573	0.15873	0.22674
LOC_Os01g62600	AP13CTG27884_s_at	AP13CTG27884	75.9229	28.106	72.2576	71.8068	0.370191	0.993761
LOC_Os01g62430	KanlowCTG39886_at	KanlCTG39886	136.713	33.9229	144.011	199.773	0.248132	1.38721
LOC_Os01g62390	KanlowCTG14452_at	KanlCTG14452	61.0626	26.8153	35.3025	38.0629	0.439145	1.07819
LOC_Os01g62390	AP13CTG07180_s_at	AP13CTG07180	655.317	87.8487	299.252	212.306	0.134055	0.709455
LOC_Os01g62070	KanlowCTG07072_s_at	KanlCTG07072	4197.82	2083.81	1027.56	1132.6	0.496403	1.10222
LOC_Os01g62070	AP13CTG08251_at	AP13CTG08251	329.716	101.128	112.628	94.8948	0.306712	0.842549
LOC_Os01g61900	AP13ITG43094_s_at	AP13ISTG43094	255.238	120.009	31.9768	30.2804	0.470185	0.946949
LOC_Os01g61610	KanlowCTG32760_at	KanlCTG32760	51.8942	20.9708	10.5425	10.8205	0.404107	1.02638
LOC_Os01g61610	AP13ITG56201_at	AP13ISTG56201	2486.73	897.731	40.2863	50.497	0.361008	1.25345
LOC_Os01g61410	AP13CTG06494_at	AP13CTG06494	158.294	65.6035	173.146	148.754	0.414441	0.859121
LOC_Os01g61400	AP13CTG04904_at	AP13CTG04904	809.675	9.26151	222.574	87.7818	0.0114385	0.394394
LOC_Os01g60860	AP13ITG69037_at	AP13ISTG69037	419.581	205.315	588.642	816.501	0.489334	1.38709
LOC_Os01g60410	KanlowCTG01089_at	KanlCTG01089	58.3841	26.2142	47.8536	39.9936	0.448995	0.83575
LOC_Os01g59970	AlamoCTG07751_s_at	AlamCTG07751	261.04	121.949	75.7133	49.2576	0.467168	0.650581
LOC_Os01g59870	AP13ITG60987_at	AP13ISTG60987	141.555	28.5913	4420.94	3692.32	0.20198	0.835188
LOC_Os01g59340	KanlowCTG08431_s_at	KanlCTG08431	1606.98	710.267	2621.27	2385.89	0.441988	0.910205
LOC_Os01g59050	KanlowCTG02589_at	KanlCTG02589	83.5281	17.9474	1214.42	700.488	0.214866	0.57681
LOC_Os01g58910	AP13CTG21583_at	AP13CTG21583	1307.39	424.622	9.47542	10.3482	0.324786	1.09211
LOC_Os01g58910	KanlowCTG17058_s_at	KanlCTG17058	7617.37	3292.59	13.7489	13.8907	0.432248	1.01031
LOC_Os01g58910	AP13CTG25271_at	AP13CTG25271	352.458	39.6195	4.68143	5.44921	0.112409	1.16401
LOC_Os01g58890	KanlowSLT48721_s_at	KanlSGLT48721	1846.87	871.153	1071.71	910.525	0.471692	0.849598
LOC_Os01g58550	AP13CTG27387RC_s_at	AP13CTG27387-RC	321.008	109.4	2112.9	2152.35	0.3408	1.01867
LOC_Os01g58400	AP13ITG40559_at	AP13ISTG40559	162.588	62.7567	77.7383	71.0961	0.385986	0.914556
LOC_Os01g58390	AP13ITG58203_at	AP13ISTG58203	505.254	250.118	264.468	203.701	0.495033	0.770231
LOC_Os01g58240	KanlowCTG37772_at	KanlCTG37772	18.6429	8.60525	11.8471	12.0562	0.461583	1.01764
LOC_Os01g57870	AP13CTG03266_s_at	AP13CTG03266	250.011	111.872	119.021	128.575	0.447467	1.08027
LOC_Os01g57340	KanlowCTG31966_at	KanlCTG31966	743.824	137.664	380.485	290.192	0.185076	0.76269
LOC_Os01g57340	AP13CTG20116RC_s_at	AP13CTG20116-RC	102.539	49.4174	43.8674	29.9494	0.481936	0.682726
LOC_Os01g57150	KanlowCTG18914_at	KanlCTG18914	40.1915	19.5698	319.849	217.813	0.486913	0.680988
LOC_Os01g56969	AP13ITG61479RC_at	AP13ISTG61479-RC	424.652	191.414	606.859	276.389	0.450755	0.455442
LOC_Os01g56870	AP13CTG30984_at	AP13CTG30984	152.821	35.7747	220.78	76.1385	0.234095	0.344862
LOC_Os01g56780	KanlowCTG29000_s_at	KanlCTG29000	920.621	432.244	770.686	870.501	0.469513	1.12951
LOC_Os01g56680	KanlowCTG34108RC_at	KanlCTG34108-RC	640.614	30.6566	1257.24	438.825	0.0478551	0.349038
LOC_Os01g56670	AlamoCTG02075_s_at	AlamCTG02075	445.592	163.285	290.715	162.208	0.366445	0.55796
LOC_Os01g56630	AP13CTG04856_at	AP13CTG04856	1992.43	987.029	985.987	655.65	0.49539	0.664968
LOC_Os01g56550	AP13ITG43099_s_at	AP13ISTG43099	263.355	52.8124	160.902	113.054	0.200537	0.702627
LOC_Os01g56320	KanlowCTG04488_at	KanlCTG04488	42.5343	19.234	503.231	466.288	0.4522	0.926588
LOC_Os01g55780	AP13CTG00116_at	AP13CTG00116	894.544	372.36	1403.76	1305.15	0.416257	0.929755
LOC_Os01g55570	KanlowSLT52252_s_at	KanlSGLT52252	134.19	53.3811	965.695	543.623	0.397801	0.562935
LOC_Os01g55410	AP13CTG22322_s_at	AP13CTG22322	391.393	178.218	57.939	62.1691	0.455344	1.07301
LOC_Os01g55160	AP13ITG65774_at	AP13ISTG65774	251.604	102.892	191.382	160.365	0.408944	0.837932
LOC_Os01g55000	AP13ITG54606RC_at	AP13ISTG54606-RC	600.491	136.357	4240.85	3202.71	0.227076	0.755205
LOC_Os01g54880	AP13CTG09156_at	AP13CTG09156	563.2	274.149	214.034	128.012	0.486771	0.598093
LOC_Os01g54600	AP13CTG29441_s_at	AP13CTG29441	2428.25	1057.52	792.658	539.48	0.435505	0.680596
LOC_Os01g54400	AP13ITG61500_s_at	AP13ISTG61500	1006.46	393.525	387.074	369.655	0.390998	0.954999
LOC_Os01g54390	OTHSWCTG04470_at	OthsCTG04470	140.699	59.7539	87.5022	75.5853	0.424695	0.863811
LOC_Os01g54340	AP13CTG29344RC_s_at	AP13CTG29344-RC	1101.84	241.528	219.507	325.207	0.219204	1.48153
LOC_Os01g54340	AP13CTG29353_s_at	AP13CTG29353	566.128	158.698	244.461	286.465	0.280321	1.17182
LOC_Os01g53730	AP13CTG12807_at	AP13CTG12807	81.8542	40.0855	140.928	85.1094	0.489718	0.60392
LOC_Os01g53240	KanlowCTG07174_s_at	KanlCTG07174	1310.07	544.25	2143.42	2012.93	0.415437	0.939117
LOC_Os01g53079	AP13CTG75729_s_at	AP13CTG75729	239.929	115.795	141.047	95.3445	0.48262	0.675976
LOC_Os01g52770	AP13CTG09526_at	AP13CTG09526	129.799	24.1308	1484.8	1274.79	0.185909	0.858565
LOC_Os01g52690	AP13ITG67750_s_at	AP13ISTG67750	236.027	74.5426	714.311	717.556	0.315823	1.00454
LOC_Os01g52550	KanlowSLT48585_at	KanlSGLT48585	136.812	48.3586	47.9173	29.2679	0.353469	0.6108
LOC_Os01g52290	OTHSWCTG06178_s_at	OthsCTG06178	58.3549	17.2182	108.394	127.73	0.29506	1.17838
LOC_Os01g52290	OTHSWCTG06178_at	OthsCTG06178	25.8297	8.78945	53.2692	66.8204	0.340284	1.25439
LOC_Os01g52260	KanlowCTG14848_s_at	KanlCTG14848	5793.87	2849.44	2113.2	2847.39	0.491803	1.34743
LOC_Os01g52240	AP13ITG52988_at	AP13ISTG52988	330.85	152.77	3633.01	1852.18	0.461749	0.50982
LOC_Os01g52230	AP13ITG40240_at	AP13ISTG40240	4909.12	1356.07	897.666	1243.46	0.276235	1.38521
LOC_Os01g51610	KanlowCTG44016_s_at	KanlCTG44016	33.8538	7.12168	25.4572	6.90111	0.210365	0.271087
LOC_Os01g51540	AP13CTG22204RC_s_at	AP13CTG22204-RC	2046.32	942.476	1188.57	1301.58	0.460571	1.09508
LOC_Os01g51380	AlamoCTG14499_at	AlamCTG14499	130.164	35.1493	70.8182	41.8371	0.270038	0.590767
LOC_Os01g51060	AP13ITG55311_s_at	AP13ISTG55311	223.7	77.0382	198.787	172.711	0.344381	0.868826
LOC_Os01g50760	AP13CTG06254_s_at	AP13CTG06254	3001.04	1458.79	6472.17	6145.08	0.486094	0.949462
LOC_Os01g50760	KanlowSLT51859_at	KanlSGLT51859	149.215	50.1265	78.4013	32.4662	0.335935	0.414103
LOC_Os01g50160	AP13CTG24230_at	AP13CTG24230	388.359	136.505	533.755	559.819	0.351491	1.04883
LOC_Os01g50160	AP13CTG24230_s_at	AP13CTG24230	159.882	63.8433	270.597	278.264	0.399315	1.02834
LOC_Os01g50160	KanlowSLT56395_at	KanlSGLT56395	76.1989	29.6592	148.894	174.342	0.389234	1.17091
LOC_Os01g49470	AP13CTG29606_at	AP13CTG29606	100.878	46.6957	46.0462	20.5288	0.462894	0.445831
LOC_Os01g48920	KanlowSLT49429_s_at	KanlSGLT49429	162.604	57.1112	93.5035	44.6414	0.351229	0.477431
LOC_Os01g48500	AP13CTG44939_s_at	AP13CTG44939	655.226	222.947	621.802	346.258	0.340259	0.556861
LOC_Os01g48500	AP13ITG66448_at	AP13ISTG66448	335.856	149.712	288.097	224.411	0.445764	0.778944
LOC_Os01g47400	AP13ITG63138_at	AP13ISTG63138	145.52	40.3211	781.52	792.429	0.277082	1.01396
LOC_Os01g47330	AP13ITG44527_at	AP13ISTG44527	745.31	357.912	3829.14	3083.04	0.480219	0.805152
LOC_Os01g46510	AP13ITG51361_at	AP13ISTG51361	243.454	58.342	130.582	79.6746	0.239643	0.610148
LOC_Os01g46350	KanlowCTG15035_at	KanlCTG15035	60.5535	29.3438	572.051	339.311	0.484593	0.593148
LOC_Os01g45990	AP13CTG14782_at	AP13CTG14782	111.622	45.0114	19.9675	19.0826	0.403249	0.955688
LOC_Os01g44260	AP13ITG75074RC_at	AP13ISTG75074-RC	46.5282	22.8805	708.595	400.377	0.491756	0.56503
LOC_Os01g44110	AP13CTG03827_at	AP13CTG03827	46.0528	12.0454	349.782	216.049	0.261556	0.617669
LOC_Os01g44069	AP13CTG24857_at	AP13CTG24857	398.089	122.45	2028.29	1971.69	0.307594	0.972094
LOC_Os01g43851	KanlowCTG46600_s_at	KanlCTG46600	526.394	228.331	463.668	617.374	0.433765	1.3315
LOC_Os01g43851	KanlowCTG03249_s_at	KanlCTG03249	460.465	206.505	423.348	558.343	0.448471	1.31887
LOC_Os01g43320	AP13CTG29008_at	AP13CTG29008	1992.05	584.197	91.1414	62.1184	0.293265	0.681561
LOC_Os01g43110	AP13CTG05211_at	AP13CTG05211	248.14	47.0272	18.913	11.9834	0.189519	0.633608
LOC_Os01g42960	AP13CTG13004_at	AP13CTG13004	36.8428	11.27	131.855	128.927	0.305894	0.977794
LOC_Os01g42870	KanlowCTG38964_at	KanlCTG38964	179.277	42.4831	286.285	17.7685	0.236969	0.0620657
LOC_Os01g42850	KanlowCTG42942_s_at	KanlCTG42942	75.9924	18.373	92.1064	25.1976	0.241774	0.273571
LOC_Os01g42810	AP13ITG35018_s_at	AP13ISTG35018	251.64	119.842	134.57	107.547	0.476243	0.799185
LOC_Os01g42810	KanlowCTG38132_at	KanlCTG38132	491.721	34.3099	178.566	141.555	0.0697751	0.792732
LOC_Os01g42810	AP13CTG31346_s_at	AP13CTG31346	65.8179	31.4595	29.7294	26.787	0.477978	0.901028
LOC_Os01g42810	AP13ITG35017_s_at	AP13ISTG35017	219.798	102.599	114.607	89.8866	0.466785	0.784301
LOC_Os01g42730	KanlowCTG16224_s_at	KanlCTG16224	1397.01	652.384	962.279	812.401	0.466987	0.844247
LOC_Os01g42520	AP13CTG10706_at	AP13CTG10706	267.812	92.6233	403.613	241.096	0.345852	0.597344
LOC_Os01g42520	KanlowCTG00536_at	KanlCTG00536	281.721	68.9247	238.661	384.843	0.244655	1.61251
LOC_Os01g42520	AP13CTG28858_at	AP13CTG28858	118.199	54.7979	256	58.1943	0.463606	0.227321
LOC_Os01g42520	AP13CTG28858_s_at	AP13CTG28858	232.777	89.4009	466.4	241.366	0.384062	0.517508
LOC_Os01g42410	AP13ITG38560_s_at	AP13ISTG38560	96.7405	35.6314	763.746	620.714	0.36832	0.812723
LOC_Os01g42234	KanlowCTG24341_at	KanlCTG24341	2027.12	562.794	41.9336	67.1268	0.277632	1.60079
LOC_Os01g42234	AP13ITG42570_s_at	AP13ISTG42570	2512.8	975.501	234.081	222.699	0.388213	0.951375
LOC_Os01g41750	OTHSWSLT24295_at	OthsSGLT24295	486.557	126.437	39.6716	44.8085	0.259861	1.12949
LOC_Os01g41550	KanlowCTG21527RC_s_at	KanlCTG21527-RC	576.708	228.335	3391.02	3052.34	0.395928	0.900126
LOC_Os01g38670	AP13CTG21631RC_at	AP13CTG21631-RC	94.3528	16.3503	106.278	55.5911	0.173289	0.523073
LOC_Os01g37860	AP13ITG38035_s_at	AP13ISTG38035	291.321	18.6117	200.873	76.7049	0.0638874	0.381858
LOC_Os01g36500	AP13CTG09428_at	AP13CTG09428	1053.19	256.221	132.075	157.647	0.243281	1.19362
LOC_Os01g36240	AP13ITG62739RC_s_at	AP13ISTG62739-RC	101.244	46.3887	2868.44	2798.26	0.458186	0.975534
LOC_Os01g36220	AP13ITG67847_s_at	AP13ISTG67847	293.347	142.827	209.383	192.787	0.486888	0.92074
LOC_Os01g34870	OTHSWCTG19741_x_at	OthsCTG19741	292.211	122.411	188.19	131.602	0.418913	0.699302
LOC_Os01g34870	AlamoCTG04220_s_at	AlamCTG04220	473.685	227.566	486.136	293.445	0.480416	0.603628
LOC_Os01g34560	AP13CTG24698_at	AP13CTG24698	1061.74	468.286	2674.55	2856.71	0.441055	1.06811
LOC_Os01g34430	KanlowCTG40935_at	KanlCTG40935	2226.49	1020.95	33.2772	112.641	0.458549	3.38493
LOC_Os01g33960	AP13CTG31922_s_at	AP13CTG31922	256.221	122.485	113.804	126.951	0.478044	1.11552
LOC_Os01g32730	AP13CTG06375_s_at	AP13CTG06375	136.243	63.6043	773.738	455.5	0.466846	0.5887
LOC_Os01g31810	OTHSWSLT28819_at	OthsSGLT28819	101.526	45.7896	98.2794	89.919	0.451015	0.914932
LOC_Os01g31810	OTHSWSLT28819_s_at	OthsSGLT28819	150.213	60.2002	202.434	162.114	0.400766	0.800825
LOC_Os01g31750	KanlowCTG36358_s_at	KanlCTG36358	280.166	73.0247	433.544	88.6721	0.260648	0.204528
LOC_Os01g28030	AP13CTG23744_at	AP13CTG23744	107.294	12.8391	709.176	615.33	0.119663	0.867669
LOC_Os01g27940	AlamoCTG14785_s_at	AlamCTG14785	400.512	198.093	196.238	120.259	0.4946	0.61282
LOC_Os01g25600	AP13ITG43326_at	AP13ISTG43326	43.2614	14.8791	71.7539	14.8877	0.343935	0.207483
LOC_Os01g22980	KanlowCTG33186_at	KanlCTG33186	39.1245	18.7412	12.3502	13.6631	0.479014	1.10631
LOC_Os01g22900	KanlowCTG24283_s_at	KanlCTG24283	455.087	208.81	381.47	359.849	0.458835	0.943322
LOC_Os01g22630	KanlowCTG39523_at	KanlCTG39523	343.8	14.1062	197.193	59.0997	0.0410303	0.299705
LOC_Os01g22500	KanlowCTG20160_at	KanlCTG20160	109.533	36.1375	96.2107	66.9821	0.329925	0.696202
LOC_Os01g22352	AP13ITG64585_at	AP13ISTG64585	926.135	282.42	1946.88	1972.83	0.304945	1.01333
LOC_Os01g22336	AP13ITG42139_s_at	AP13ISTG42139	377.495	163.711	3823.17	3509.25	0.433678	0.917891
LOC_Os01g22080	AP13ITG74612_at	AP13ISTG74612	81.5481	39.1282	101.128	77.4401	0.479818	0.765765
LOC_Os01g21970	AP13CTG29741_at	AP13CTG29741	327.422	32.1545	61.2054	49.6661	0.098205	0.811465
LOC_Os01g21970	AP13CTG29741_s_at	AP13CTG29741	354.128	39.2346	71.5132	54.5739	0.110792	0.76313
LOC_Os01g21970	AP13CTG22020_at	AP13CTG22020	59.7844	5.5023	81.6032	17.2803	0.0920357	0.211759
LOC_Os01g21034	AP13CTG24766_at	AP13CTG24766	154.436	38.0693	1807.82	1640.75	0.246505	0.907585
LOC_Os01g20910	AP13ITG62884_at	AP13ISTG62884	165.616	76.6681	607.821	325.598	0.462927	0.535681
LOC_Os01g20730	AP13ITG71248_at	AP13ISTG71248	69.0972	16.3653	790.588	666.431	0.236845	0.842956
LOC_Os01g19970	KanlowCTG09455_at	KanlCTG09455	367.101	170.959	296.112	297.228	0.465698	1.00377
LOC_Os01g19740	AP13ITG60873RC_at	AP13ISTG60873-RC	412.662	111.046	256.221	194.128	0.269096	0.757658
LOC_Os01g19470	KanlowCTG06622_at	KanlCTG06622	459.869	90.5445	263.507	276.309	0.196892	1.04858
LOC_Os01g18800	KanlowCTG42796_at	KanlCTG42796	423.666	205.251	310.073	344.9	0.484465	1.11232
LOC_Os01g18660	AP13ITG41997_at	AP13ISTG41997	388.48	172.45	22.8371	14.5989	0.443909	0.639259
LOC_Os01g18400	AP13CTG59058_at	AP13CTG59058	2328.89	692.681	64.101	58.1943	0.29743	0.907853
LOC_Os01g18290	AP13CTG19978_s_at	AP13CTG19978	3104.26	458.352	685.085	709.329	0.147652	1.03539
LOC_Os01g17214	KanlowCTG40605_s_at	KanlCTG40605	109.899	43.3146	69.7963	40.6998	0.394131	0.583122
LOC_Os01g17214	AlamoCTG14525_s_at	AlamCTG14525	95.7071	41.0736	71.0278	47.3748	0.429159	0.66699
LOC_Os01g17214	AP13ITG39195_x_at	AP13ISTG39195	196.559	69.5778	106.537	55.5228	0.353979	0.521158
LOC_Os01g16960	AP13CTG07060_at	AP13CTG07060	446.589	201.61	516.354	403.647	0.451444	0.781724
LOC_Os01g16960	AP13CTG07060_s_at	AP13CTG07060	274.539	130.464	337.997	273.702	0.47521	0.809778
LOC_Os01g16620	AP13CTG01066_at	AP13CTG01066	120.764	52.6289	37.7927	31.2347	0.435799	0.826475
LOC_Os01g16540	AP13CTG03192_at	AP13CTG03192	138.41	41.5502	121.751	120.285	0.300196	0.987962
LOC_Os01g16414	KanlowCTG16237_at	KanlCTG16237	80.3051	31.3422	68.727	68.1786	0.390289	0.992021
LOC_Os01g16354	AP13CTG18162_at	AP13CTG18162	629.527	134.367	525.106	411.772	0.213441	0.78417
LOC_Os01g16152	AP13CTG30879_s_at	AP13CTG30879	5330.42	1980.57	4841.53	3769.18	0.371559	0.77851
LOC_Os01g15900	AP13CTG06047_at	AP13CTG06047	796.485	388.48	138.141	174.92	0.487744	1.26624
LOC_Os01g15690	AP13ITG38145_s_at	AP13ISTG38145	444.311	210.212	181.675	93.09	0.47312	0.512398
LOC_Os01g15600	AP13CTG13008_at	AP13CTG13008	803.414	325.176	826.974	666.351	0.404743	0.805771
LOC_Os01g15340	AP13ITG71976_at	AP13ISTG71976	1172.37	448.046	118.339	104.063	0.38217	0.879359
LOC_Os01g15340	AP13ITG63789_at	AP13ISTG63789	2006.05	798.804	202.372	194.03	0.398198	0.95878
LOC_Os01g15110	OTHSWCTG06809_x_at	OthsCTG06809	136.239	30.5472	32.4438	18.9031	0.224218	0.582643
LOC_Os01g14890	AP13.13166.m00004_s_at	AP13_model_13166.m00004	190.476	90.8609	92.146	66.5353	0.477021	0.722064
LOC_Os01g14590	AP13CTG59140_s_at	AP13CTG59140	903.975	327.658	1315.78	976.345	0.362464	0.74203
LOC_Os01g13800	AP13CTG27435_s_at	AP13CTG27435	420.215	194.8	303.386	149.755	0.463572	0.493614
LOC_Os01g12810	AP13CTG21450_s_at	AP13CTG21450	20.3225	5.62664	50.064	32.1807	0.276867	0.642792
LOC_Os01g12770	AP13ITG36667_s_at	AP13ISTG36667	1055.32	521.028	803.588	584.127	0.493716	0.726899
LOC_Os01g12720	KanlowCTG15665_at	KanlCTG15665	154.377	64.9324	102.892	57.3335	0.42061	0.557221
LOC_Os01g12440	KanlowCTG07363_s_at	KanlCTG07363	798.804	335.461	671.066	630.588	0.419954	0.939681
LOC_Os01g12220	AP13CTG57667_at	AP13CTG57667	90.5118	12.001	118.888	68.842	0.13259	0.579048
LOC_Os01g12160	AP13ITG44930_s_at	AP13ISTG44930	155.957	60.9688	88.3663	60.8021	0.390932	0.688068
LOC_Os01g12110	AP13ITG51654_at	AP13ISTG51654	1057.87	236.501	1152.17	798.344	0.223563	0.692904
LOC_Os01g11910	AP13ITG64948_at	AP13ISTG64948	498.586	155.6	106.553	79.9008	0.312083	0.749871
LOC_Os01g11810	AP13CTG21618_at	AP13CTG21618	77.99	34.507	423.145	400.435	0.442454	0.94633
LOC_Os01g11710	AP13ITG65018_at	AP13ISTG65018	141.807	53.8753	3169.72	2482.37	0.37992	0.783152
LOC_Os01g11550	KanlowCTG15853_s_at	KanlCTG15853	61.0055	26.0146	466.537	394.808	0.42643	0.846252
LOC_Os01g11240	AP13CTG15627_at	AP13CTG15627	2977.74	42.4444	5538.26	3203.48	0.0142539	0.578427
LOC_Os01g11240	AP13CTG15627_s_at	AP13CTG15627	768.394	305.03	2469.49	3030.24	0.396971	1.22707
LOC_Os01g11240	KanlowCTG40034_at	KanlCTG40034	52.5656	21.739	159.234	93.3823	0.41356	0.586446
LOC_Os01g11080	KanlowCTG46218_s_at	KanlCTG46218	45.6397	19.5003	45.6415	19.1991	0.427266	0.420651
LOC_Os01g10810	AP13CTG16277_s_at	AP13CTG16277	66.5353	26.4478	140.658	73.5238	0.397501	0.522713
LOC_Os01g10490	KanlowCTG01543_s_at	KanlCTG01543	637.121	172.305	11347.1	10086.5	0.270442	0.888907
LOC_Os01g10490	AP13ITG41200_s_at	AP13ISTG41200	177.936	83.3839	3929.15	3653.54	0.468617	0.929855
LOC_Os01g10210	AP13ITG73747RC_at	AP13ISTG73747-RC	128.847	6.26704	15.1664	7.44282	0.0486394	0.490744
LOC_Os01g09860	KanlowSLT51930_s_at	KanlSGLT51930	33.2437	16.3927	452.824	394.865	0.493108	0.872007
LOC_Os01g09860	AP13CTG15035_s_at	AP13CTG15035	69.7533	31.1159	312.335	317.105	0.446085	1.01527
LOC_Os01g09750	AP13CTG19900_at	AP13CTG19900	846.331	144.679	551.053	320.838	0.170948	0.582227
LOC_Os01g09750	KanlowCTG10768_s_at	KanlCTG10768	433.544	76.2841	318.469	252.148	0.175955	0.79175
LOC_Os01g09590	AP13ITG58998_at	AP13ISTG58998	309.85	73.9	53.3148	39.4004	0.238503	0.739015
LOC_Os01g08780	AP13CTG22224RC_at	AP13CTG22224-RC	226.238	90.9161	64.4839	45.458	0.40186	0.704952
LOC_Os01g08110	KanlowCTG38713_s_at	KanlCTG38713	202.294	91.1126	40.7899	147.122	0.450396	3.60682
LOC_Os01g08110	AP13CTG05506_s_at	AP13CTG05506	194.686	91.7991	35.233	142.519	0.471523	4.04504
LOC_Os01g08020	AP13CTG07764_at	AP13CTG07764	37.4209	11.4403	266.077	287.31	0.305718	1.0798
LOC_Os01g07770	AP13CTG08714_at	AP13CTG08714	77.2384	28.69	5.38945	7.85336	0.371447	1.45717
LOC_Os01g07376	AP13CTG25025_s_at	AP13CTG25025	673.287	300.253	384.012	205.079	0.445951	0.534042
LOC_Os01g07300	AP13ITG69011_at	AP13ISTG69011	1892.46	265.028	50.2552	32.0735	0.140044	0.638213
LOC_Os01g07200	VS16ITG11053_at	VS16ISTG11053	92.4314	34.1122	31.782	36.6807	0.369054	1.15413
LOC_Os01g06560	AP13CTG23688RC_at	AP13CTG23688-RC	1177.65	297.656	1443.15	939.018	0.252754	0.650671
LOC_Os01g06000	KanlowCTG39691_at	KanlCTG39691	133.516	64.6786	150.181	116.996	0.484427	0.779034
LOC_Os01g05840	AP13CTG03357_at	AP13CTG03357	249.006	109.35	1608.22	1188.74	0.439145	0.739165
LOC_Os01g05140	AP13ITG43732_at	AP13ISTG43732	280.307	85.1094	256.927	230.809	0.303629	0.898343
LOC_Os01g04950	KanlowCTG09772_at	KanlCTG09772	84.169	18.0878	188.929	252.627	0.214899	1.33716
LOC_Os01g04860	AP13CTG25644_s_at	AP13CTG25644	503.352	179.716	346.341	303.473	0.357039	0.876227
LOC_Os01g04630	AP13CTG04467_at	AP13CTG04467	1105.37	501.475	429.114	330.143	0.453672	0.769361
LOC_Os01g04200	AP13ITG55160_at	AP13ISTG55160	58.3841	27.9889	21.8755	23.9175	0.479393	1.09334
LOC_Os01g04070	KanlowCTG27929_at	KanlCTG27929	275.328	129.94	125.149	80.2095	0.471944	0.640912
LOC_Os01g04070	AP13ITG73730RC_at	AP13ISTG73730-RC	27.3788	11.1622	10.9141	10.3753	0.407697	0.950628
LOC_Os01g03980	AP13ITG66005_at	AP13ISTG66005	205.251	86.1523	175.697	197.404	0.419741	1.12355
LOC_Os01g03620	KanlowCTG46406_at	KanlCTG46406	75.3261	32.8018	1049.14	823.386	0.435464	0.784823
LOC_Os01g03510	AP13CTG02702_at	AP13CTG02702	1578.34	668.925	1296.91	1034.71	0.423817	0.797824
LOC_Os01g03490	KanlowCTG04495_s_at	KanlCTG04495	628.35	302.334	2639.5	2410.32	0.481156	0.913173
LOC_Os01g03490	KanlowCTG06005_s_at	KanlCTG06005	637.121	297.185	2768.86	2530.27	0.466449	0.913831
LOC_Os01g02400	AP13CTG13341_at	AP13CTG13341	674.083	183.586	64.7812	76.9163	0.272349	1.18732
LOC_Os01g01870	KanlowCTG21153_at	KanlCTG21153	249.024	97.1947	80.7757	75.0395	0.390303	0.928986
LOC_Os01g01420	KanlowCTG12927_at	KanlCTG12927	38.7194	11.0096	19.7748	14.8429	0.284343	0.750597
LOC_Os01g01369	AP13CTG06540_at	AP13CTG06540	637.581	295.487	359.547	287.158	0.46345	0.798668
LOC_Os01g01280	AP13ITG76742RC_at	AP13ISTG76742-RC	149.118	43.7042	57.9585	38.4803	0.293084	0.663928
LOC_Os01g01150	KanlowCTG42011_s_at	KanlCTG42011	739.292	330.571	385.797	238.546	0.447146	0.618321
//Purine metabolism; Selenoamino acid metabolism; Sulfur metabolism; Metabolic pathways/0	KanlowCTG46500_s_at	KanlCTG46500	157.087	76.5061	121.604	115.537	0.487028	0.950112
///	AlamoCTG08874_s_at	AlamCTG08874	24.5699	6.63599	14.7801	9.55133	0.270087	0.646227
///	AP13CTG08705_at	AP13CTG08705	1175.3	352.139	776.345	394.045	0.299615	0.507564
///	AP13CTG09772_s_at	AP13CTG09772	70.6304	18.0722	38.6313	32.1962	0.255871	0.833423
///	AP13CTG11937_at	AP13CTG11937	310.834	103.168	206.997	126.951	0.331908	0.613299
///	AP13CTG13282_s_at	AP13CTG13282	413.04	97.9153	270.623	193.047	0.23706	0.713342
///	AP13CTG26712_at	AP13CTG26712	180.045	51.5358	119.532	82.7285	0.286238	0.692106
///	AP13CTG30642_at	AP13CTG30642	91.698	23.0541	58.0336	36.4243	0.251413	0.627641
///	AP13ITG36232_s_at	AP13ISTG36232	211.725	64.5036	160.342	85.1667	0.304657	0.531156
///	KanlowCTG24187_s_at	KanlCTG24187	659.589	257.569	537.468	314.311	0.3905	0.584799
///	KanlowCTG30050_x_at	KanlCTG30050	78.4888	29.8635	61.713	37.4119	0.380481	0.606224
///	KanlowCTG30566_s_at	KanlCTG30566	52.1091	22.168	44.955	25.5453	0.425416	0.568242
///	KanlowCTG34303_at	KanlCTG34303	144.235	53.96	113.258	63.7973	0.374113	0.563295
///	KanlowSLT49315_at	KanlSGLT49315	390.873	122.626	263.355	177.311	0.313725	0.673277
///	KanlowSLT50313_at	KanlSGLT50313	206.559	79.1133	173.595	94.8088	0.383006	0.54615
///	KanlowSLT51619_at	KanlSGLT51619	72.4834	18.8229	56.212	34.4408	0.259685	0.612696
///	OTHSWSLT31512_at	OthsSGLT31512	344.9	108.511	228.5	151.802	0.314616	0.664343
///	AlamoCTG02258_at	AlamCTG02258	70.8012	17.205	37.2681	24.8591	0.243004	0.667033
///	AlamoCTG06984_at	AlamCTG06984	60.3386	27.1193	56.8982	32.3781	0.449452	0.569054
///	AlamoCTG07516_at	AlamCTG07516	65.0821	27.5692	59.5069	39.2383	0.423606	0.65939
///	AlamoCTG07825_at	AlamCTG07825	71.3313	35.4601	49.0243	28.874	0.497119	0.588973
[truncated: 594 more rows]
